# Supplementary material
Source: PubMed Central journal article supplement (PMC3197745)
Supplement: NIHMS329039-supplement-1_si_001.pdf [file NIHMS329039-supplement-1_si_001.pdf]

# Supporting Information

## Pre-oxidation for Colorimetric Sensor Array Detection of VOCs

Hengwei Lin,<sup>†</sup> Minseok Jang<sup>†</sup> and Kenneth S. Suslick\*

*Department of Chemistry, University of Illinois at Urbana-Champaign,  
600 S. Mathews Avenue, Urbana, Illinois 61801 USA*

\*Corresponding author: ksuslick@illinois.edu

<sup>†</sup>Contributed equally

### Experimental Section

All reagents, including the 20 VOCs, were analytical-reagent grade, obtained from Sigma-Aldrich, and used without further purification unless otherwise specified. The silica used was Davisil 636, 250-500  $\mu\text{m}$ , pore size 6.0 nm, 480  $\text{m}^2/\text{g}$ .

The preparation of colorimetric sensor array, including the dyes used in the arrays, had been reported in our earlier paper.<sup>1</sup> For these studies comparing the effects of pre-oxidation, we specifically have used the array developed in reference 1 and not that of later publications (reference 2). The array used in this study (and reference 1) is more sensitive to detection of acids than the array used in reference 2, and hence better suited to the partial oxidation products created during the pre-oxidation process.

#### Procedure for preparation of chromic acid loaded on silica:

The chromic acid on silica was made by mixing silica gel (10.0 g),  $\text{Na}_2\text{Cr}_2\text{O}_7$  (4.0 g), 98%  $\text{H}_2\text{SO}_4$  (2.5 mL), and  $\text{H}_2\text{O}$  (10.0 mL). CAUTION: exothermic reaction upon mixing! Water was removed under vacuum at 60  $^\circ\text{C}$  for an hour. The resulting gel was further dried by flowing dry nitrogen overnight.

For liquids, the VOC vapor streams were produced by bubbling dry nitrogen through their corresponding pure compound. The vapors of solid VOCs were generated from flowing dry nitrogen through the corresponding compound that filled in glass tube (~20 cm long). The resulting vapor stream was then mixed with a diluting stream of nitrogen gas and nitrogen bubbled through water to keep the stream at 50% relative humidity (RH). Importantly, VOC vapor concentrations were confirmed by in-line analysis using an FT-IR multi-gas analyzer, MKS Instruments model 2030.

MKS digital mass flow controllers were used to adjust the wet/dry  $\text{N}_2$  flow rate to achieve the desired concentrations at 50%

RH. The response of the colorimetric sensor arrays is essentially an equilibrium response and is therefore not generally dependent (after equilibration) on flow rate or dose.<sup>1,2</sup> Slower flow rates of course require longer equilibration times. For all data used in these studies, the flow rate was 500 sccm and fully equilibrated responses were taken after 5 minutes of exposure to the VOC flow.

For all sensing experiments, the arrays were imaged on an ordinary flatbed scanner (Epson Perfection V200); the before-exposure image was acquired after 2 min of 50% RH  $\text{N}_2$  at a flow rate of 500 sccm, and after-exposure images were acquired with full equilibration after five minutes of exposure to the pre-determined VOC vapor concentrations at 500 sccm. Difference maps were obtained by taking the difference of the red, green, and blue (RGB) values from the center of every colorant spot (~300 pixels) from the “before” and “after” images; all difference maps shown here are averages of multiple trials. Digitization of the color differences can be performed using Adobe Photoshop<sup>TM</sup> or with a customized software package, ChemEye<sup>TM</sup> (ChemSensing, Inc., Champaign, IL). The chemometric analysis was carried out on the color difference vectors using the Multi-Variate Statistical Package<sup>TM</sup> (MVSP v.3.1, Kovach Computing); in all cases, minimum variance (i.e., “Ward’s Method”) was used for HCA clustering.

- (1) Lim, S. H.; Feng, L.; Kemling, J. W.; Musto, C. J.; Suslick, K. S. *Nature Chem.* **2009**, *1*, 562-567.
- (2) (a) Feng, L.; Musto, C. J.; Kemling, J. W.; Lim, S. H.; Suslick, K. S. *Chem. Commun.* **2010**, *46*, 2037-2039. (b) Feng, L.; Musto, C. J.; Kemling, J. W.; Lim, S. H.; Zhong, W.; Suslick, K. S. *Anal. Chem.* **2010**, *82*, 9433-9440.

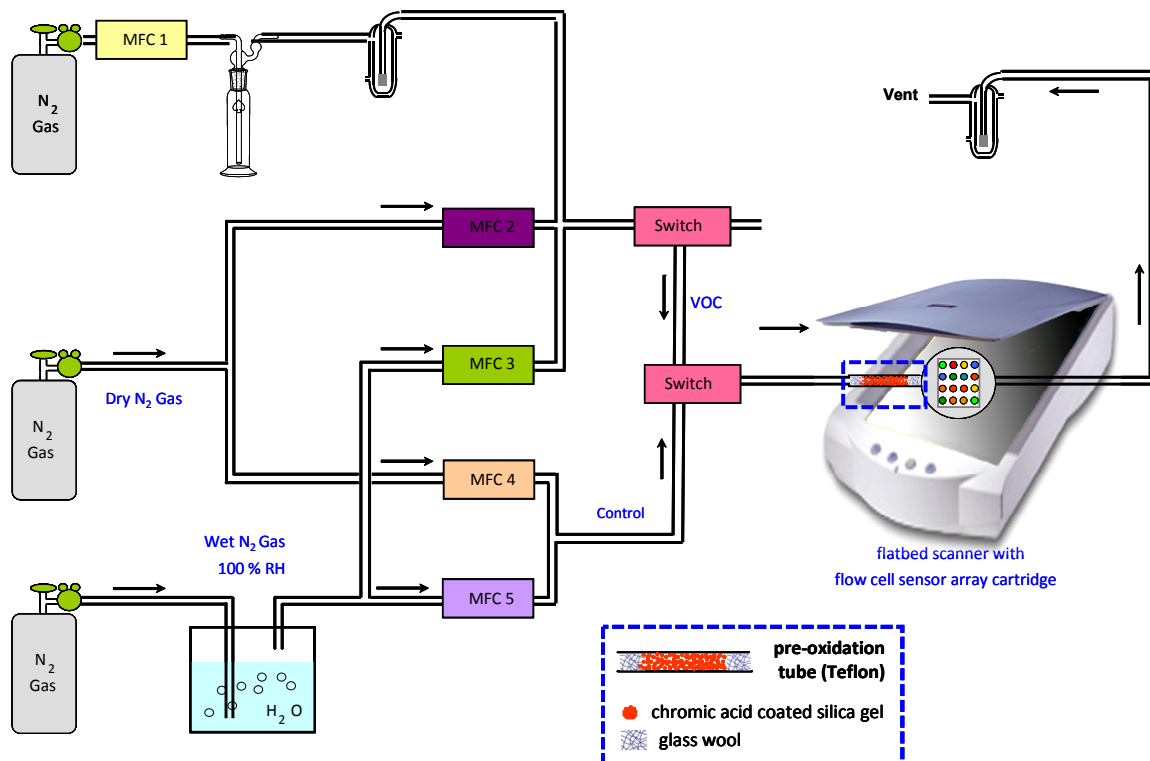

**Figure S1.** Experimental setup for exposure of colorimetric sensor arrays with pre-oxidation. The experiments of direct responses to VOCs were carried out similarly but without the pre-oxidation tube. The box labeled “switch” is actually a series of three three-way valves, which allows for venting and also diversion of the analyte stream to the MKS multi-gas analyzer. MFC = mass flow controller.

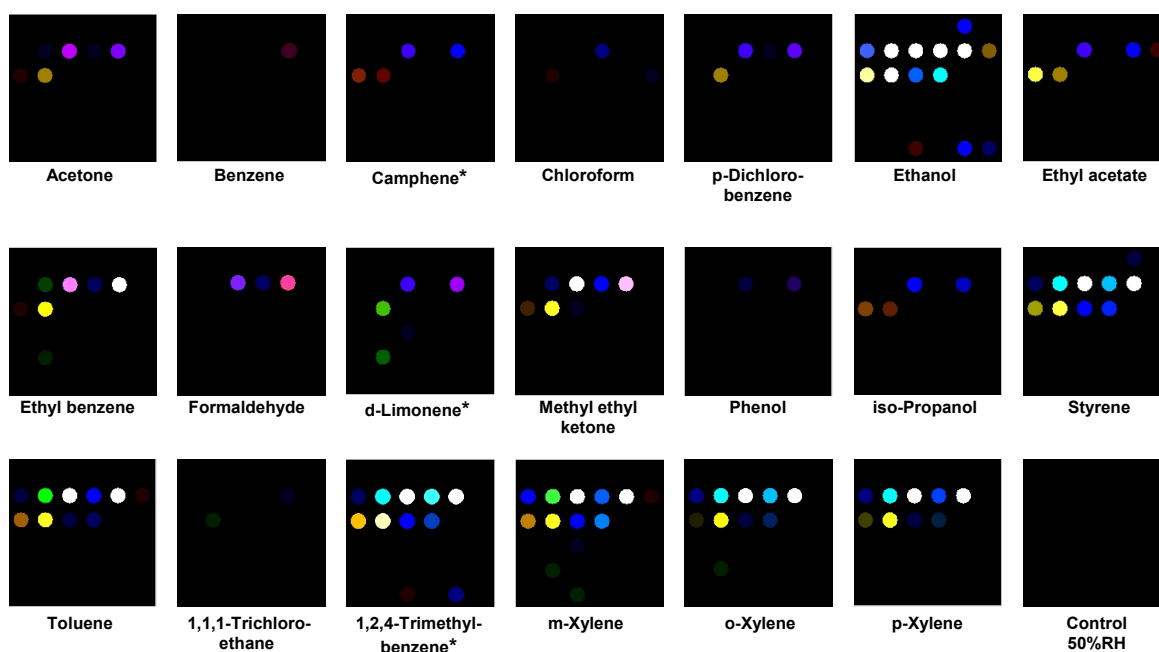

**Figure S2.** Color change profiles of the 20 representative volatile organic compounds (VOCs) at their Permissible Exposure Limit (PEL) concentrations using pre-oxidation and a control; 5 min exposure at 50% relative humidity and 298K. PEL concentrations are given in Table 1. For purposes of visualization, the color range of these difference maps is expanded from 3 to 8 bits per color (RGB range of 3-10 expanded to 0-255). All experiments were run in quintuplicate with 30 mg chromic acid loaded silica gel as pre-oxidation reagent.

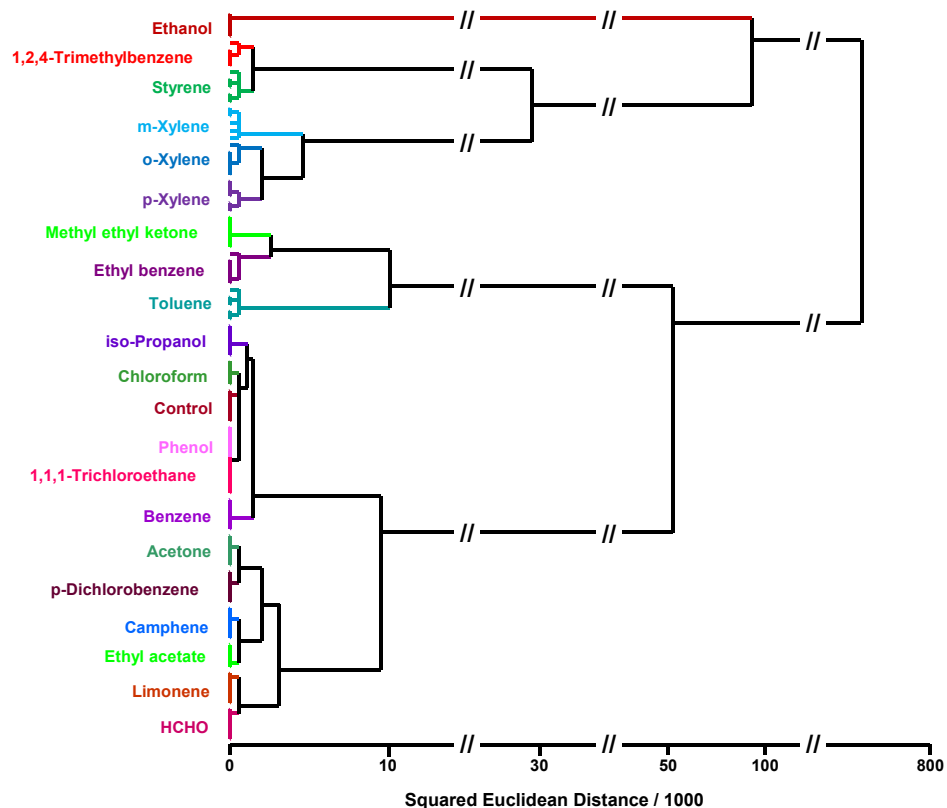

**Figure S3.** Hierarchical cluster analysis for 20 commonly found VOCs at their PEL and a control. All experiments were run in quintuplicate with 30 mg chromic acid loaded silica gel as pre-oxidation reagent; no confusions or errors in classification were observed in 105 trials.

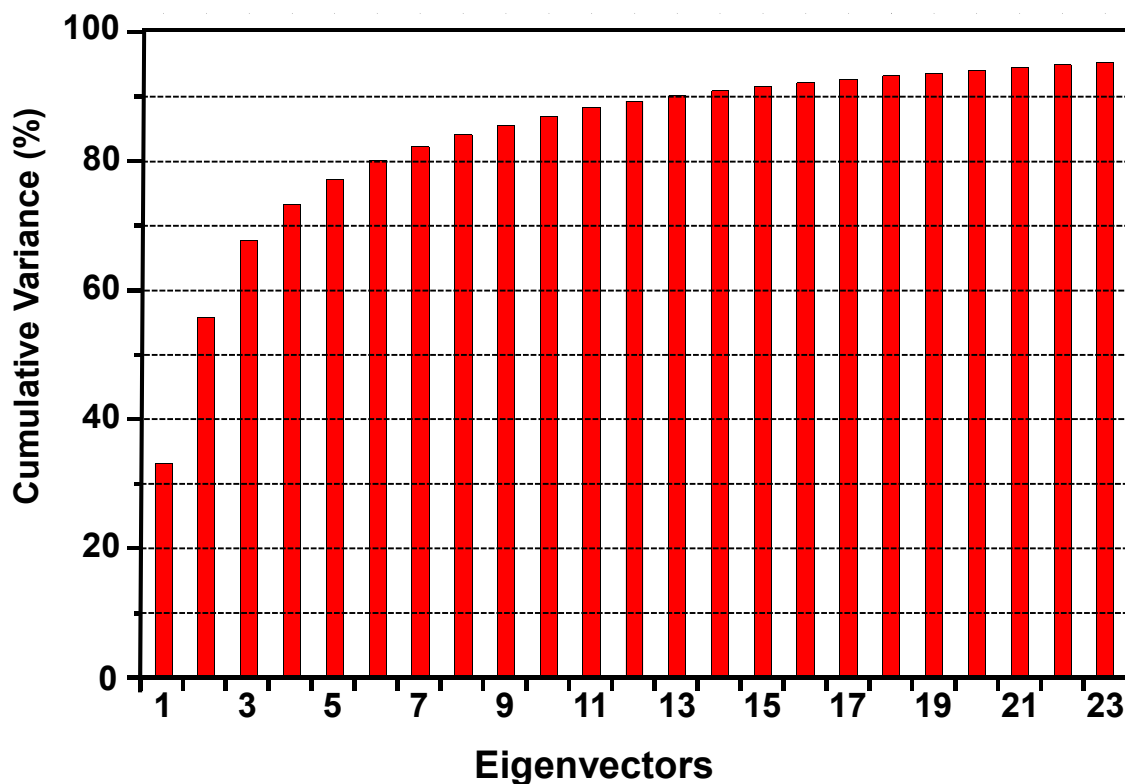

**Figure S4.** Scree plot of the principal components from PCA of 105 trials using 20 VOCs at their IDLH and a control. The colorimetric sensor array has an extraordinary high level of dispersion: 13 dimensions are required to capture 90% of the total variance, 23 dimensions for 95%.

## without Pre-Oxidation Tube

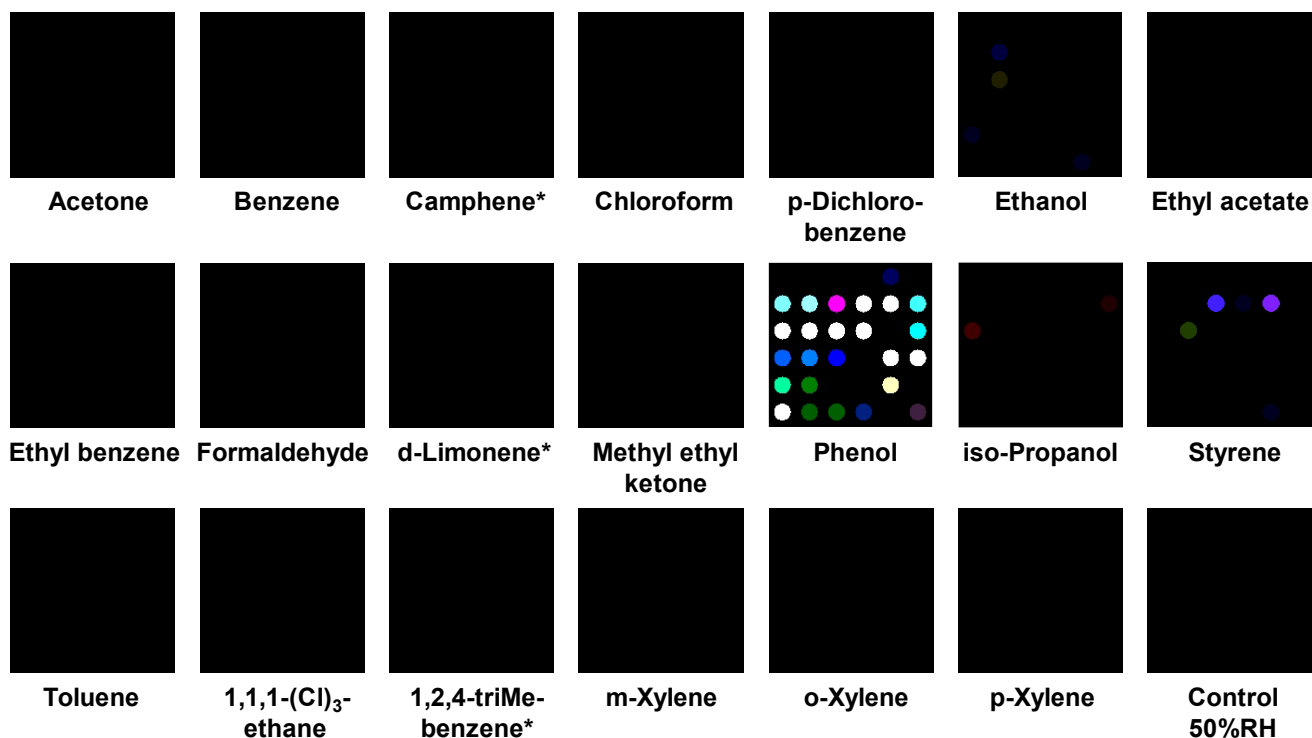

## with Pre-Oxidation Tube

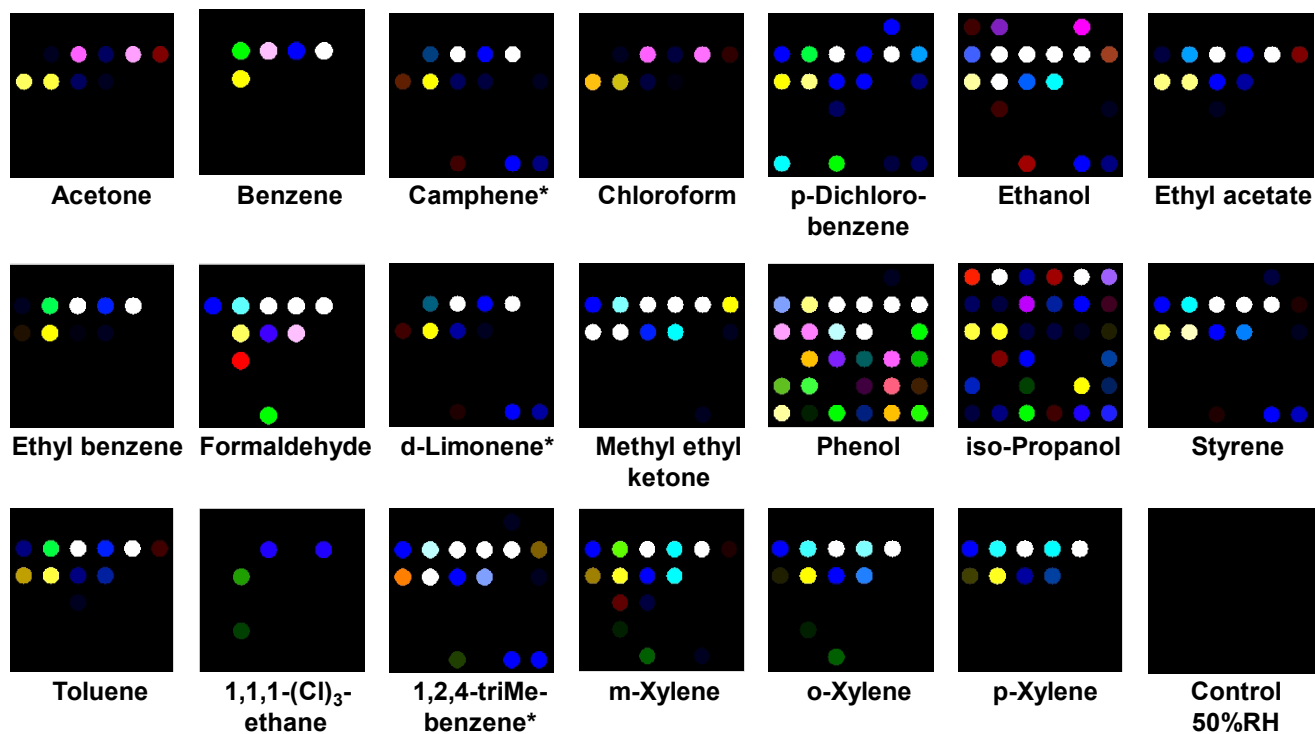

**Figure S5.** The direct responses of color change profiles of the 20 representative volatile organic compounds (VOCs) at their IDLH concentration *without pre-oxidation* compared to the color change profiles *with pre-oxidation*; 5 min exposure at 50% relative humidity and 298K. For purposes of visualization, the color range of these difference maps is expanded from 3 to 8 bits per color (RGB range of 3-10 expanded to 0-255). All experiments were run in quintuplicate.

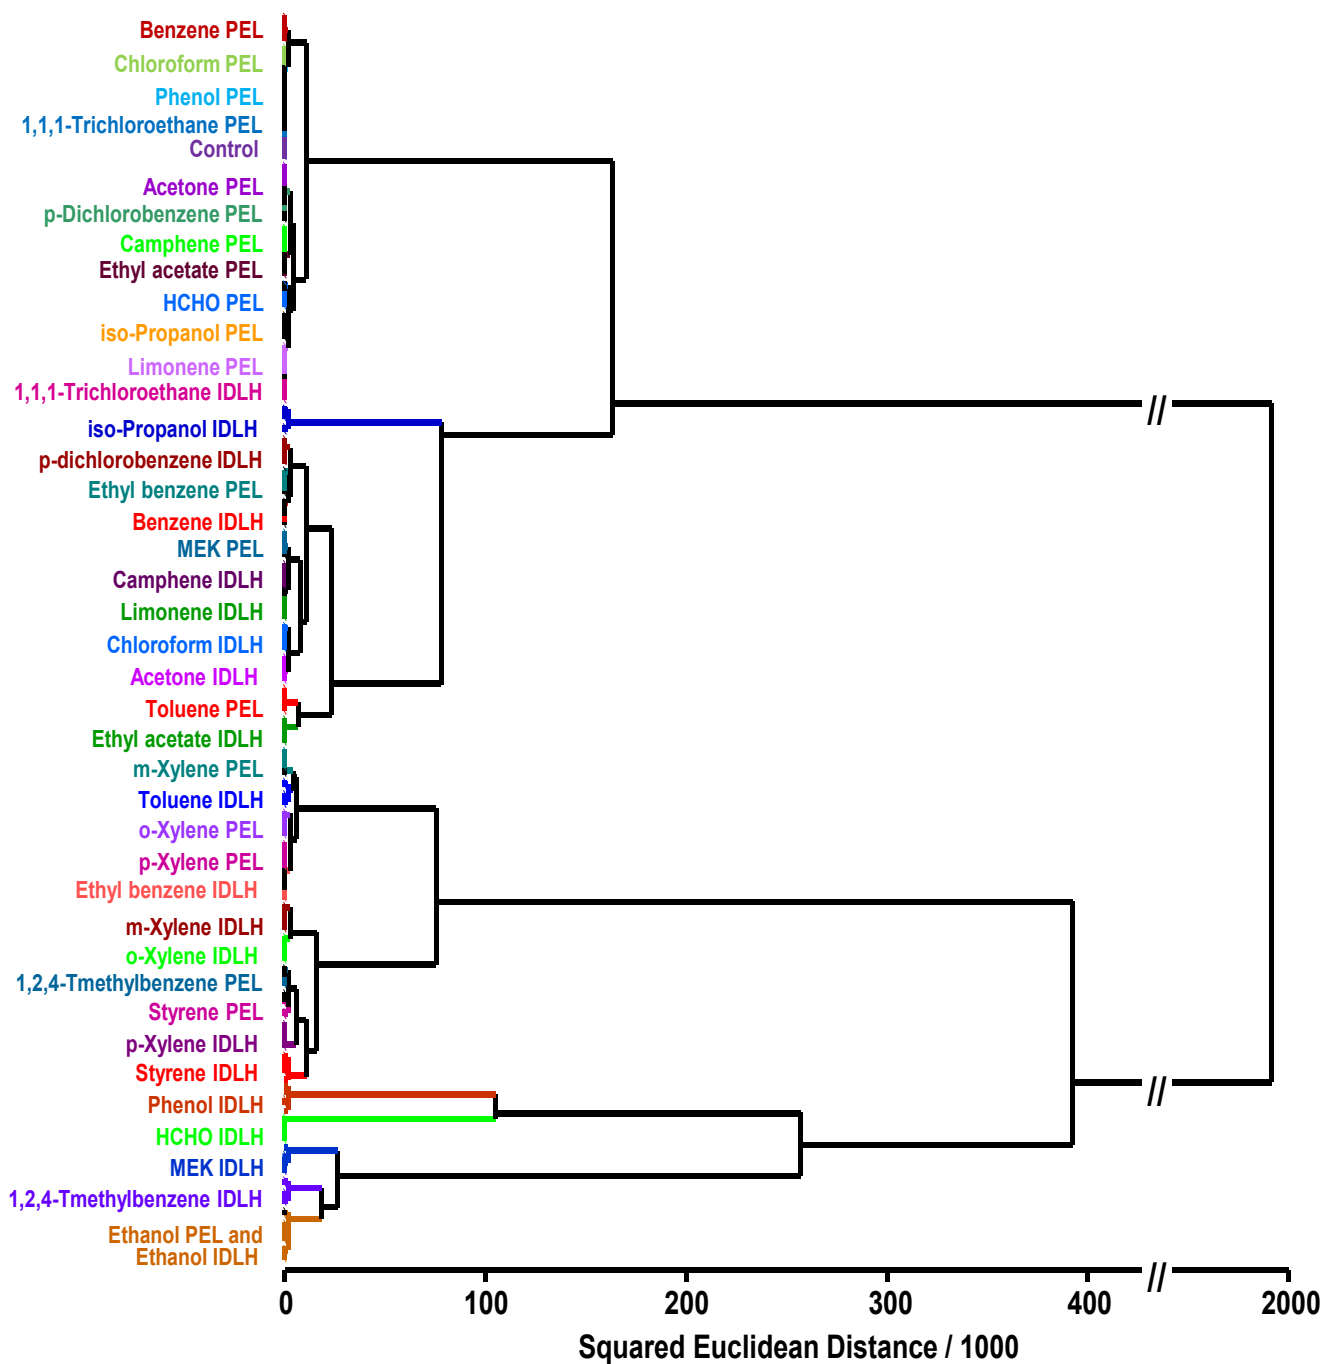

**Figure S6.** Hierarchical cluster analysis for 20 commonly found VOCs at their IDLH and PEL. All experiments were run in quintuplicate with 30 mg chromic acid loaded silica gel as pre-oxidation reagent; no confusions or errors in classification were observed in 205 trials, with the exception of ethanol, where the extremely high concentrations required for the IDLH and PEL of ethanol saturate the array response.

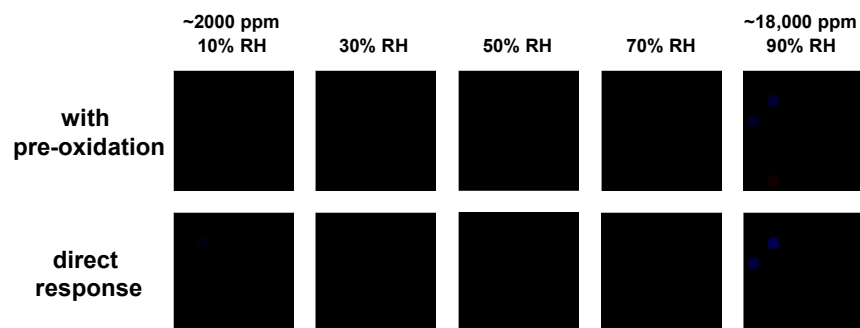

**Figure S7.** The colorimetric sensor array is unaffected by changes in humidity, either with or without VOC pre-oxidation (with 30 mg chromic acid loaded silica gel as pre-oxidation reagent). There is essentially no response to variations in relative humidity (RH) from 10% to 90%. For purposes of visualization, the color range of these difference maps is expanded from 3 to 8 bits per color (RGB range of 3-10 expanded to 0-255).

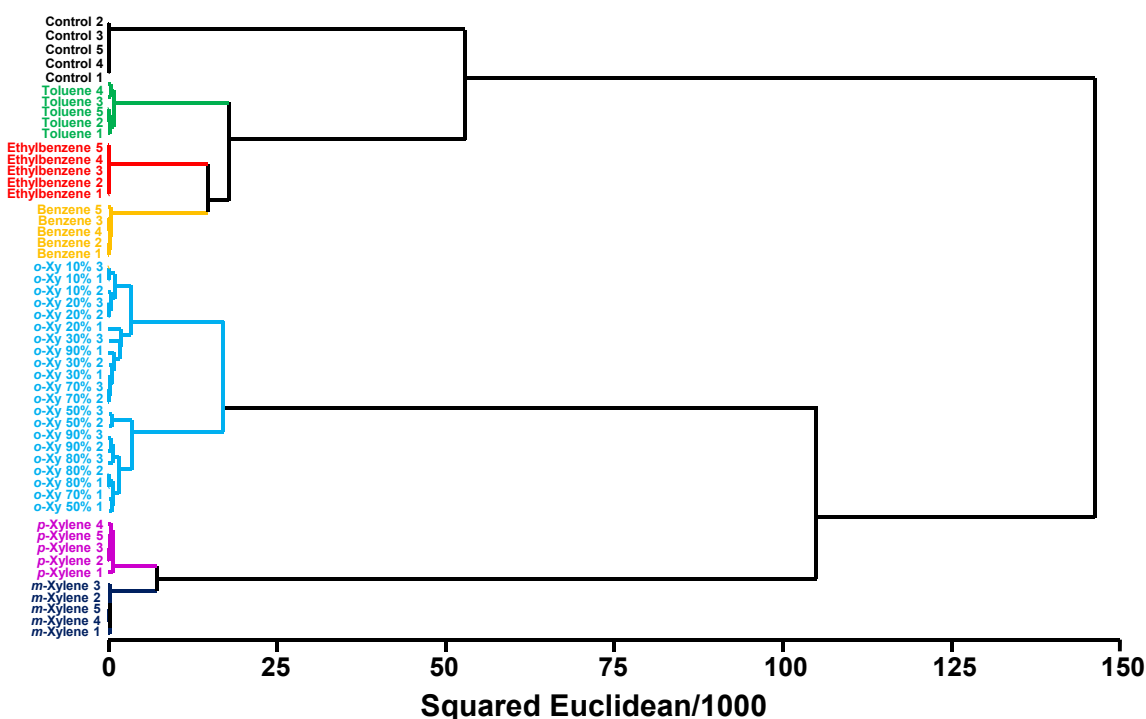

**Figure S8.** Hierarchical cluster analysis for *o*-xylene at different relative humidities (10% through 90% RH, all at room temperature) compared to other closely related aromatic hydrocarbons (i.e., BTEX components) all at their IDLH concentrations. As shown, changes in relative humidity do not lead to confusion between *o*-xylene and even *m*- or *p*-xylenes.

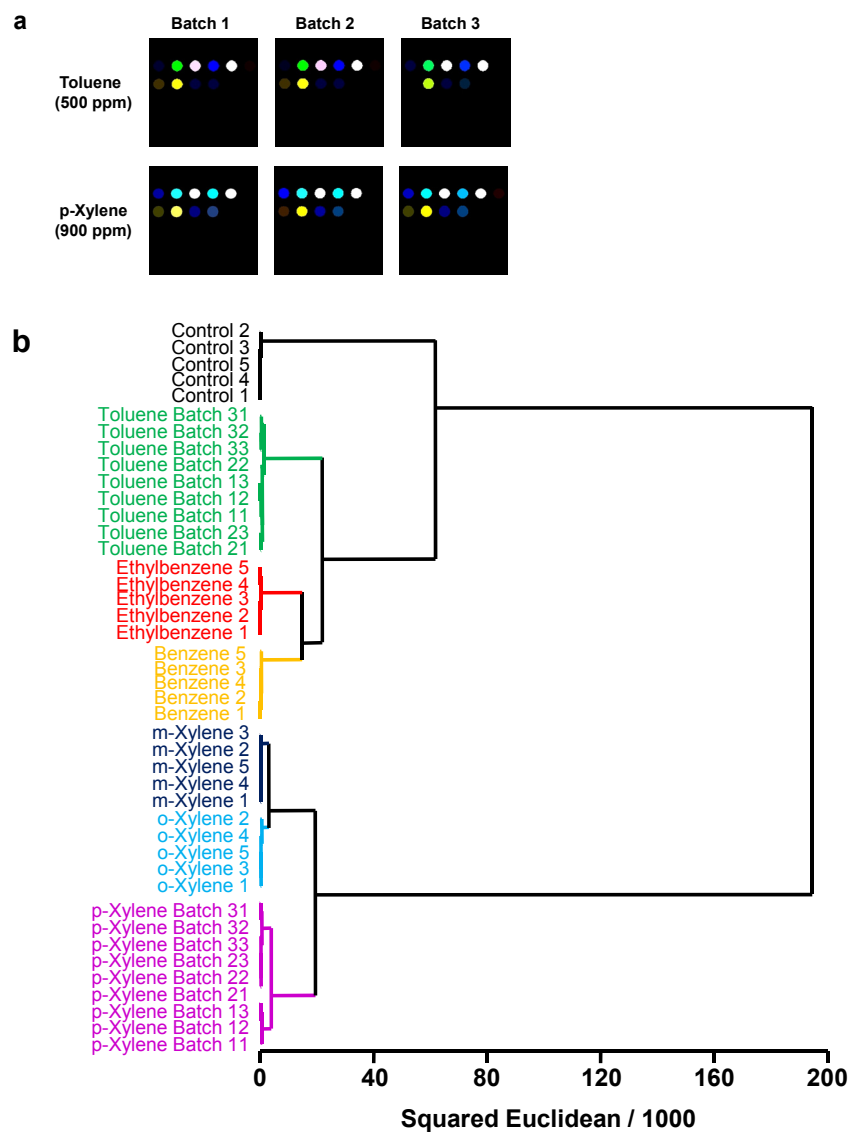

**Figure S9.** Reproducibility of chromic acid on silica as a pre-oxidation reagent for VOCs detection. (a) Digital color difference maps of toluene and *p*-xylene (after 5 min exposure) at their IDLH with three separately preparing batches of chromic acid on silica. For display purposes, the color range of these difference maps is expanded from 3 to 8 bits per color (RGB range of 3-10 expanded to 0-255). (b) Hierarchical cluster analysis for the responses of toluene and *p*-xylene with three separately preparing batches of chromic acid on silica as pre-oxidation reagent; each batch of chromic acid was tested in triplicate using *p*-xylene, compared with the array responses in quintuplicate to benzene, ethylbenzene, *o*-xylene, and *m*-xylene (all at their IDLH) and a control of N<sub>2</sub>.

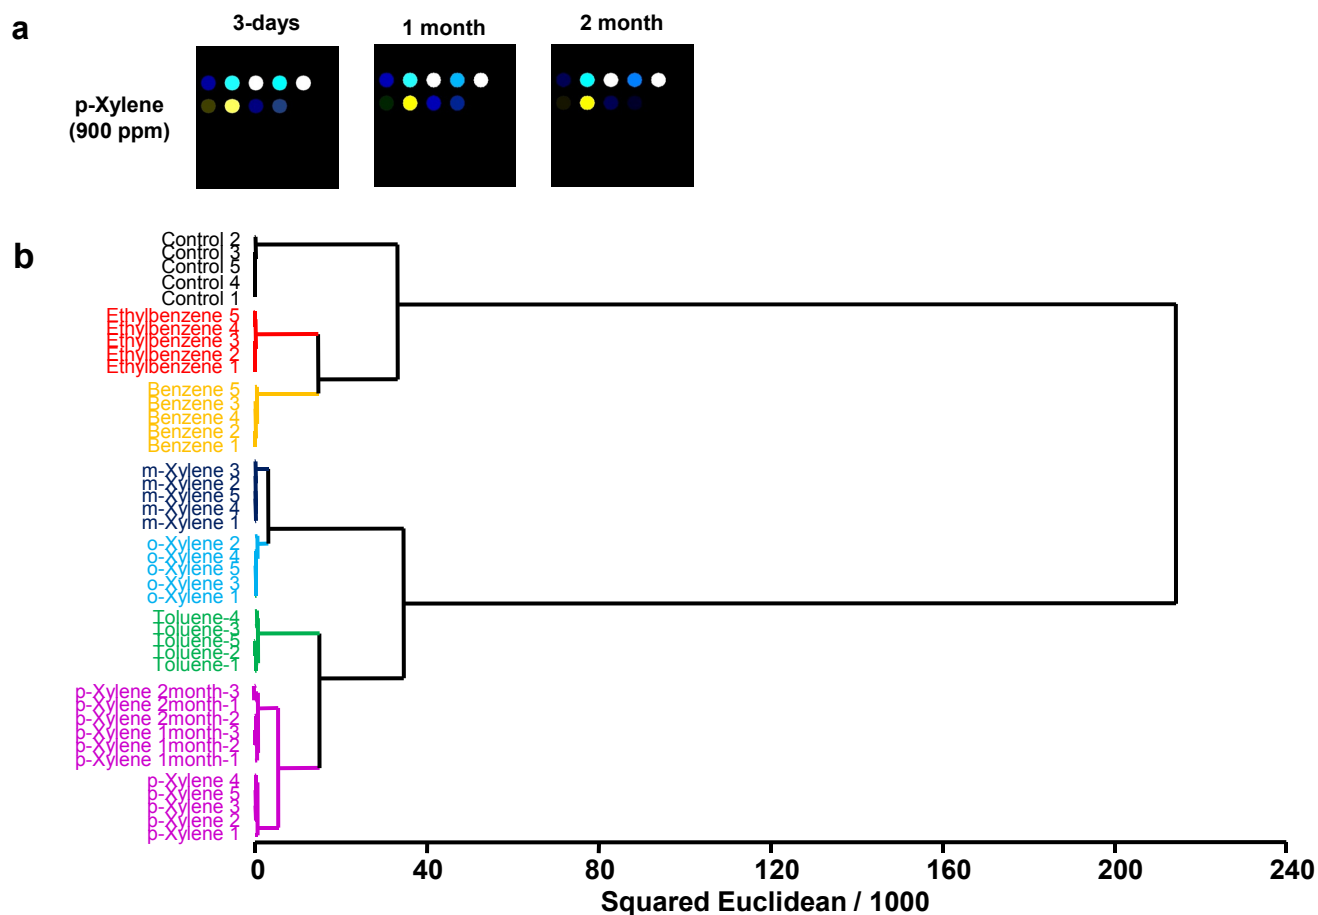

**Figure S10.** Shelf-life stability of chromic acid on silica as a pre-oxidation reagent for VOCs detection. (a) Digital color difference maps of *p*-xylene (after 5 min exposure) at its IDLH after pre-oxidation using the same batch of chromic acid on silica as it was aged (for 3 days, 1 month and 2 months, stored under N<sub>2</sub>). For display purposes, the color range of these difference maps is expanded from 3 to 8 bits per color (RGB range of 3-10 expanded to 0-255); (b) Hierarchical cluster analysis for the responses of *p*-xylene after pre-oxidation using the same batch of chromic acid on silica as it was aged (for 3 days, 1 month and 2 months, stored under N<sub>2</sub>), each batch of chromic acid stored various lengths of time were run using triplicate trials of *p*-xylene compared with the array responses in quintuplicate to benzene, ethylbenzene, *o*-xylene, and *m*-xylene (all at their IDLH) and a control of N<sub>2</sub>.

**Table S1.** Database for 20 VOCs at IDLH and a control with pre-oxidation after five min exposure.

|                 | R1       | G1       | B1       | R2       | G2       | B2       | R3         | G3       | B3       | R4       | G4       | B4       | R5       | G5       | B5       | R6       | G6       | B6       | R7       | G7       | B7       | R8       | G8       | B8       | R9       | G9       | B9       |
|-----------------|----------|----------|----------|----------|----------|----------|------------|----------|----------|----------|----------|----------|----------|----------|----------|----------|----------|----------|----------|----------|----------|----------|----------|----------|----------|----------|----------|
| Control 1       | -0.67827 | 0.124634 | 0.257971 | -0.07826 | -0.82608 | -1.46667 | -0.22029   | -0.31594 | -0.95363 | 0.156525 | 0.304344 | 0.066666 | -0.46376 | -0.55072 | -0.12754 | -0.26667 | 0.023186 | 0.547827 | 0.104348 | -0.27536 | 0.205795 | 0.44928  | 0.315933 | -0.41449 | 0.371017 | 0.086952 | -1.46088 |
| Control 2       | -0.2029  | 0.373917 | -0.10435 | 2.159409 | 3.617386 | 4.689857 | 2.05217    | 1.973915 | 2.50145  | 1.631882 | 0.550728 | 0.889854 | 1.657974 | 1.263771 | 1.652174 | 0.707245 | 1.794205 | 0.857971 | 0.101449 | 0.605797 | 0.394211 | -0.25508 | -1.13335 | -0.64638 | 1.101448 | 0.359421 | -1.16522 |
| Control 3       | 0.782608 | 0.478264 | 0.263768 | 0.110153 | 0.626083 | -0.56522 | 0.043488   | -1.08986 | 1.50145  | 0.339142 | 0.400002 | -0.43478 | -0.04347 | 0.489853 | -0.25507 | 0.252174 | -0.04058 | -0.46377 | -0.43189 | -0.48116 | -1.46376 | 0.156525 | 0.191299 | 0.614494 | 0.011597 | -0.36322 | 0.298553 |
| Control 4       | -0.22029 | -0.17682 | -0.4087  | -0.41159 | 0.101448 | -1.12464 | -0.18262   | -0.16522 | -1.71304 | 0.078262 | -0.30724 | -0.44348 | 0.110138 | -0.6029  | -0.58261 | -0.28116 | 0.104488 | -0.45797 | -0.04388 | -0.44348 | 0.249268 | 0.055084 | -0.90724 | -1.0145  | -0.52174 | -0.14203 | 0.168121 |
| Control 5       | -0.29276 | -0.4     | 0.269565 | 0.22319  | 0.014488 | -0.3971  | -0.12755   | -0.03478 | -0.9971  | 0.008698 | 0.292755 | -0.32464 | -0.43768 | -0.04348 | -0.23478 | 0.663765 | 0.301453 | -0.70145 | -0.41449 | -0.30725 | 1.379715 | -0.13913 | -0.57971 | -1.18551 | -0.85507 | -0.26376 | 0.898544 |
| Ethanol 1       | -5.31015 | 3.57391  | 0.698551 | -5.42899 | 4.13913  | -10.6725 | -0.31593   | 2.124641 | -2.06957 | 0.260864 | -2.75362 | 1.707253 | -6.72464 | 2.353638 | -19.713  | -1.73914 | -0.93623 | -1.42899 | 6.602898 | -6.93913 | -17.3044 | 15.6058  | -65.687  | -37.3362 | 120.1884 | 87.41449 | -130.667 |
| Ethanol 2       | -5.42609 | 3.411594 | 0.568115 | -7.46957 | 4.565216 | -9.66377 | -0.71014   | 2.58551  | -1.46668 | -0.46666 | -3.21739 | 0.075363 | -10.8464 | 3.002899 | -27.3507 | -2.88985 | -0.74493 | -2.84348 | 5.950725 | -6.97681 | -16.2667 | 14.58551 | -60.0696 | -40.4174 | 112.9159 | 84.21159 | -119.881 |
| Ethanol 3       | -4.68115 | 4.197102 | 0.814493 | -6.85217 | 4.3797   | -10.4667 | -0.8203    | 2.199997 | -1.94203 | 0.292755 | -2.90145 | 0.710144 | -7.13913 | 2.478256 | -20.1971 | -2.73914 | -0.90144 | -1.93913 | 5.918841 | -5.1942  | -11.687  | 15.85797 | -59.2609 | -34.0957 | 112.5015 | 78.94203 | -125.954 |
| Ethanol 4       | -6.83188 | 3.713047 | -0.05797 | -5.97392 | 5.481171 | -10.0029 | 0.165222   | 2.939133 | -2.1739  | 1.063766 | -2.07536 | 1.785507 | -6.04929 | 2.368118 | -21.7623 | -2.35942 | -0.49275 | -2.71304 | 5.527536 | -5.42319 | -9.65508 | 15.72464 | -59.2145 | -33.1768 | 116.1768 | 82.91884 | -131.043 |
| Ethanol 5       | -3.54784 | 1.97681  | 0.94203  | -1.38551 | 1.385498 | -1.89856 | 0.347839   | 2.223183 | -1.93913 | -0.04347 | -1.45507 | 1.124641 | -2.51885 | 0.237686 | -4.45218 | -1.73044 | 0.310143 | -0.64348 | 7.113044 | -7.43189 | -22.8696 | 9.759415 | -55.3159 | -40.7101 | 115.2927 | 82.03768 | -128.38  |
| Ethyl acetate 1 | -0.45508 | 0.29855  | 0.423188 | 0.785507 | 0.959419 | -0.72174 | -0.11015   | 0.426086 | 0.924637 | 0.53624  | -0.15363 | 1.05217  | 0.127533 | 0.44928  | 0.68116  | -0.04058 | 1.17971  | 0.698547 | 0.22029  | -1.27826 | -3.10436 | 1.556534 | -6.96523 | -11.2087 | 30.81449 | 13.30145 | -93.2754 |
| Ethyl acetate 3 | -1.2058  | 0.45797  | 0.913044 | -1.02029 | 1.098557 | -1.60291 | 0.339142   | 0.898552 | -0.24928 | 0.50145  | -0.30724 | 0.188408 | -0.28116 | -0.2029  | 1.695648 | 0.449272 | 1.217392 | 0.971012 | 0.150725 | -2.00869 | -3.08116 | 1.055069 | -6.31014 | -11.7913 | 41.29565 | 22.21739 | -98.2899 |
| Ethyl acetate 4 | -0.71014 | 0.411594 | 0.405798 | 0.353622 | 0.321739 | -0.53044 | 0.104355   | 0.759422 | -0.94782 | -0.1942  | -0.5797  | 0.550728 | -0.46956 | -0.76233 | 0.875366 | -0.23478 | 0.27536  | -0.44348 | 0.144928 | -1.26957 | -5.12174 | 1.408691 | -8.67535 | -11.2116 | 32.13043 | 13.64348 | -98.3478 |
| Ethyl acetate 4 | -1.22898 | 0.54203  | 0.142029 | -0.11304 | 0.915939 | -0.97971 | 0.043472   | 0.782608 | 0.269577 | 0.379715 | 0.397102 | 0.939125 | -0.05217 | -0.02608 | 1.124641 | -0.28986 | 1.54493  | -0.02319 | 0.147826 | -1.93333 | -2.9884  | 1.478256 | -7.16521 | -11.6377 | 39.6116  | 21.4058  | -95.6812 |
| Ethyl acetate 5 | -1.16232 | 0.373913 | -0.04348 | -0.49275 | 0.45797  | -1.11304 | -0.103769  | 1.028992 | -0.58212 | -0.65216 | -0.13913 | 0.202896 | -1.31883 | -0.66087 | -0.66666 | -0.88696 | 0.481163 | -0.16232 | 0.243478 | -0.88986 | -3.8116  | 0.802902 | -6.97102 | -9.33333 | 29.63768 | 12.7942  | -94.4957 |
| Isopropanol 1   | -20.7275 | 4.34203  | -3.16522 | -29.6956 | 16.83769 | -36.913  | -0.3826    | 0.898552 | -8.48116 | -8.57391 | -2.35362 | -3.61739 | -34.7565 | 12.89565 | -35.8812 | -8.74493 | -6.88406 | -18.4229 | 0.092758 | -1.66957 | -6.31015 | -1.31883 | -6.31888 | -5.88116 | 9.605795 | 1.211594 | -37.1246 |
| Isopropanol 2   | -16.9942 | 3.321739 | -3.05797 | -19.458  | 9.556519 | -24.5507 | -1.05508   | 0.724632 | -5.47357 | -5.30435 | -4.64348 | -2.78551 | -28.0783 | 9.295656 | -32.0145 | -9.43188 | -8.48046 | -19.4638 | 0.262754 | -1.15942 | -6.77101 | -0.89566 | -2.42029 | -4.44928 | 7.040581 | 0.223188 | -33.9246 |
| Isopropanol 3   | -20.1565 | 2.985508 | -3.02899 | -29.4116 | 14.98261 | -40.9478 | -1.64926   | -0.86087 | -10.7884 | -10.3797 | -5.0058  | -8.32319 | -31.5362 | 10.56522 | -33.2    | -12.8609 | -10.7971 | -23.0406 | 0.127536 | -1.25507 | -6.0174  | -0.76811 | -2.72754 | -3.44928 | 4.962318 | -0.04348 | -27.9072 |
| Isopropanol 4   | -22.0493 | 4.631886 | -3.73333 | -29.2464 | 16.42609 | -39.9275 | -1.2       | 0.31884  | -7.53624 | -10.0464 | -2.82609 | -3.02029 | -28.3507 | 10.42319 | -29.9304 | -10.0841 | -7.85217 | -19.4928 | -0.18551 | -1.41159 | -4.89565 | -0.64638 | -2.29565 | -2.12754 | 5.608696 | 0.008696 | -25.258  |
| Isopropanol 5   | -21.3884 | 4.408695 | -4.68116 | -30.5449 | 15.67536 | -39.8899 | -1.12174   | 0.565216 | -9.10724 | -12.6203 | -3.06087 | -5.04927 | -33.7855 | 12.6087  | -30.9478 | -10.5449 | -9.22029 | -20.9188 | 0.281159 | -1.92464 | -5.06667 | -0.64928 | -2.92174 | -3.25217 | 7.246378 | 0.385508 | -30.4058 |
| MEK 1           | -1.65797 | 0.997101 | 0.730434 | 0.127533 | 1.440582 | -1.27536 | -0.73624   | 1.121742 | -0.29855 | -0.09276 | 0.530434 | 0.092751 | -0.0145  | 0.547821 | -1.46957 | -1.36811 | 1.423187 | -0.21159 | 2.286957 | -2.86956 | -15.0638 | 7.736237 | -42.3913 | -13.7652 | 102.571  | 65.68116 | -145.768 |
| MEK 2           | -2.84638 | 1.408695 | 1.214493 | -0.27826 | -0.22897 | 0.168121 | 0.286957   | 0.95652  | -0.30144 | -1.42029 | 0.049278 | 0.431885 | 0.023193 | -0.54204 | -1.40289 | -0.63478 | 0.950729 | -0.05797 | 2.463768 | -1.53913 | -15.1246 | 6.886948 | -41.4783 | -14.0493 | 99.49855 | 64.42319 | -140.542 |
| MEK 3           | -1.28116 | 1.513042 | 1.321739 | -0.03188 | 0.797096 | -1.24637 | -0.49275   | 1.191307 | 0.446365 | -0.10146 | -0.11594 | 0.608696 | -0.15073 | 0.385513 | 0.142029 | -1.51595 | 2.078262 | -0.49275 | 2.136232 | -1.33623 | -15.7942 | 9.205795 | -41.9826 | -11.3449 | 101.9507 | 64.17971 | -145.258 |
| MEK 4           | -2.05217 | 0.968117 | 0.295652 | 0.052185 | 0.559418 | -0.42319 | -0.64638   | 1.568123 | -0.15363 | -0.22318 | 0.298553 | 0.489853 | -0.30725 | -0.21159 | -0.4     | -2.07826 | 1.359421 | -0.26377 | 2.724638 | -1.72754 | -14.7188 | 6.176804 | -38.9855 | -12.7652 | 100.8087 | 63.87536 | -143.849 |
| MEK 5           | -0.54202 | 1.423191 | 0.898551 | 1.028976 | 1.881157 | -0.68115 | -0.2031891 | 1.336235 | 2.002899 | 1.924637 | 0.666664 | -0.57681 | 0.808701 | -0.1913  | -0.55942 | -0.46087 | 2.223183 | -0.37101 | 2.173913 | -0.92464 | -12.2841 | 9.046371 | -43.6116 | -18.0377 | 102.3623 | 67.09275 | -136.125 |
| Styrene 1       | -3.04057 | 1.046375 | 1.115942 | -0.65218 | -1.72174 | -1.02029 | -1.17682   | 0.281158 | 0.171005 | -1.05507 | -1.31015 | 0.255074 | -1.5739  | -0.77101 | -5.94782 | -3.03768 | 0.307243 | -0.26667 | 1.188406 | -2.23478 | -10.3681 | 2.466675 | -28.0058 | -25.1594 | 100.087  | 80.59421 | -125.426 |
| Styrene 2       | -2.75652 | 0.353622 | 1.913042 | -0.54782 | -0.77391 | -1.85217 | -0.20898   | 0.08696  | -1.22318 | -0.20869 | -0.6087  | 1.599998 | -1.69855 | 0.831879 | -5.30145 | -3.75073 | 2.710144 | -0.59131 | 0.878261 | -1.69275 | -7.85797 | 3.110138 | -29.3449 | -29.1536 | 82.13333 | 65.68696 | -120.988 |
| Styrene 3       | -1.35942 | 0.768116 | 0.504348 | -0.51305 | -1.43768 | -0.68695 | -1         | -0.69856 | -1.76233 | -0.26668 | -1.39999 | -0.03188 | -3.04057 | -0.86957 | -0.32146 | -3.28116 | 0.536232 | -0.34203 | 1.049275 | -2.23478 | -8.63478 | 3.65506  | -29.4667 | -26.4754 | 94.66957 | 75.85217 | -121.91  |
| Styrene 4       | -0.91884 | 1.266666 | 1.895653 | 0.228989 | 0.423187 | 0.234772 | -0.09564   | 0.510147 | 0.307236 | -0.55652 | 0.446373 | 1.292755 | -0.86667 | 0.107239 | -3.81159 | -4.14783 | 4.214493 | -0.31304 | 1.098551 | -1.23188 | -6.3681  | 5.17392  | -30.1362 | -31.3275 | 100.1391 | 81.66087 | -117.406 |
| Styrene 5       | -1.21159 | 0.695652 | 1.686957 | 0.072464 | -0.32463 | -0.35362 | -0.0087    | -0.10725 | 0.782608 | 0.820297 | -0.68695 | 1.852173 | -0.86377 | -0.1768  | -2.93623 | -2.2029  | 2.089851 | -0.6116  | 0.675362 | -1.05507 | -7.25508 | 4.194199 | -26.5507 | -22.0319 | 82.77681 | 64.12464 | -120.438 |
| Acetone 1       | -1.51595 | 1.055073 | 0.182609 | -0.66377 | 0.002899 | -1.35942 | 0.026077   | 0.733337 | -0.88696 | -0.26666 | 0.599998 | 0.133331 | -0.43767 | -0.1739  | 0.915939 | -0.0029  | 0.736229 | 0.837681 | 0.136232 | -1.04638 | -2.48116 | -0.37102 | -3.04638 | -2.8116  | -0.37102 | -3.04638 | -58.4609 |
| Acetone 2       | -1.6029  | 1.046379 | -0.21449 | 0.084061 | -0.08986 | -1.59129 | 0.437683   | -0.1971  | -0.13043 | -0.48406 | -0.20869 | 0.292747 | -0.48116 | -0.36232 | 1.292755 | -0.28406 | 1.075363 | 0.327534 | 0.063768 | -0.70435 | -2.91594 | -0.31303 | -3.44927 | -3.86087 | 16.17391 | 6.455072 | -53.0319 |
| Acetone 3       | -1.25217 | 0.527538 | 0.026087 | -1.60001 | 1.376808 | -1.53622 | 0.220291   | 0.704346 | -1.30435 | -0.36232 | -0.18841 | 0.26667  | 0.518829 | -0.5942  | 1.37101  | 0.460876 | 0.82029  | 0.539127 | 0.263768 | -0.82319 | -2.87537 | -0.51015 | -3.04637 | -3.68116 | 16.0058  | 6.457972 | -52.9449 |
| Acetone 4       | -0.85797 | 0.449276 | 0.489855 | 0.095657 | 0.327538 | 0.510147 | 0.037674   | 0.727531 | -0.78261 | 0.814484 | 0.698555 | -0.36811 | 0.828979 | -0.51595 | 0.084053 | 0.344925 | 0.562317 | 0.417393 | 0.017391 | -0.82899 | -2.67827 | -0.10144 | -3.50435 | -4.25217 | 16.82029 | 6.956522 | -55.3797 |
| Acetone 5       | -1.27247 | 0.260868 | 0.321739 | -0.3913  | 0.701454 | -0.20869 | 0.023178   | 0.286957 | -1.73912 | 0.391296 | 0.513046 | -0.36811 | 0.86377  | -0.51015 | 0.165215 | 0.028984 | 0.553619 | 0.092754 | -0.01159 | -1.14493 | -2.17392 |          |          |          |          |          |          |

|                 | R10      | G10      | B10      | R11      | G11        | B11      | R12      | G12      | B12       | R13      | G13      | B13      | R14      | G14      | B14      | R15      | G15      | B15      | R16      | G16      | B16      | R17      | G17      | B17      | R18      | G18      | B18      |
|-----------------|----------|----------|----------|----------|------------|----------|----------|----------|-----------|----------|----------|----------|----------|----------|----------|----------|----------|----------|----------|----------|----------|----------|----------|----------|----------|----------|----------|
| Control 1       | 0.26087  | -0.26667 | -0.74492 | 1.417389 | 0.124641   | -2       | -0.29855 | -0.88405 | -0.10725  | 0.455078 | -0.59999 | -0.54782 | 0.495651 | 0.208702 | -1.24347 | 0.594203 | 0.417397 | -1.55072 | 1.449276 | 0.55072  | -0.67827 | 0.211594 | -0.30144 | 0.136246 | -0.46668 | -0.46087 | 0.052177 |
| Control 2       | -0.01159 | -0.16522 | 0.066666 | 1.15942  | 0.736237   | -1.96231 | -0.14493 | -0.14203 | 0.426086  | -0.75362 | 0.026093 | -1.43768 | -0.39131 | -2.24638 | -2.72754 | 0.75942  | -0.22609 | -0.77103 | 0.202898 | 0.028984 | -0.18262 | 0.176819 | -2.90146 | -1.62318 | 0.489853 | 1.49855  | 0.652176 |
| Control 3       | 0.150725 | 0.846378 | -0.55652 | 0.257973 | 0.205803   | 0.217392 | -0.25507 | -0.08116 | -0.05799  | -1.05797 | -0.12463 | -0.37972 | -0.02899 | 0.072464 | 1.07246  | -0.08696 | 0.092751 | -0.71884 | -0.08696 | 0.321739 | 0.13623  | -0.78551 | 0.005798 | 0.110138 | 0.582596 | -0.03188 | -0.82898 |
| Control 4       | 0.014493 | -0.10145 | -0.74783 | 0.988405 | -0.13913   | -1.74493 | -1.2029  | -0.55362 | -1.03478  | -0.36812 | -0.22899 | -0.58841 | -0.12174 | -0.19131 | -0.91594 | -0.10725 | -0.04058 | -0.25507 | 0.223186 | -0.22029 | -0.96812 | 0.463776 | -0.42899 | -2.41449 | -0.64348 | -0.02898 | -1.47536 |
| Control 5       | -0.0058  | 0.165218 | 0.942032 | 0.130434 | 0.388412   | -1.04637 | -0.74204 | 0.284058 | -0.37971  | -0.47537 | -0.71304 | 1.142029 | -0.05219 | 0.460869 | -0.2058  | -0.07246 | 0.176811 | 0.037689 | -0.41159 | -0.08115 | 0.510132 | -0.58261 | -0.1797  | -1.70145 | -0.22609 | 0.347824 | 0.13044  |
| Ethanol 1       | 41.65797 | 58.99131 | -117.864 | 163.3478 | 67.32463   | -123.209 | 10.69276 | 6.173904 | -6.11594  | 20.06377 | 13.33044 | -9.49276 | 94.70435 | 101.9971 | -23.5015 | 0.904348 | -7.67826 | -33.2261 | 0.86087  | -14.2116 | -17.8029 | 2.42057  | 0.602905 | 0.768112 | -1.82898 | 0.678261 | 2.063766 |
| Ethanol 2       | 44.67246 | 57.55362 | -118.426 | 157.6232 | 62.57682   | -114.064 | 8.611588 | 5.834778 | -4.92754  | 18.20869 | 12.34493 | -8.65218 | 88.2116  | 95.51885 | -22.771  | 0.64058  | -6.4029  | -30.9246 | 2.875362 | -13.0087 | -17.8899 | 1.953613 | 1.994202 | -0.48116 | -1       | 1.379715 | -0.26667 |
| Ethanol 3       | 31.42899 | 49.26957 | -110.322 | 151.2261 | 64.93044   | -119.626 | 9.301453 | 6.243484 | -3.43768  | 20.6957  | 14.33044 | -9.02029 | 88.49565 | 95.57681 | -21.858  | 0.423188 | -6.90725 | -32.0058 | 1.736232 | -12.1246 | -16.2985 | 3.165222 | 2.475372 | 1.208694 | 0.817383 | 2.33913  | 1.121738 |
| Ethanol 4       | 31.82319 | 49.22609 | -107.701 | 153.8145 | 64.72173   | -119.528 | 8.86087  | 7.70726  | -4.33913  | 20.2058  | 13.59131 | -8.42319 | 90.43189 | 99.51595 | -23.3913 | 0.947826 | -6.48695 | -27.142  | 3.814493 | -11.9362 | -14.8638 | 3.295654 | 2.36232  | -1.8232  | -1.3971  | 2.069572 | 5.643478 |
| Ethanol 5       | 34.91884 | 53.43189 | -110.377 | 154.5797 | 59.23188   | -112.907 | 7.939133 | 5.530426 | -3.8058   | 14.34378 | 7.463776 | -7.8029  | 88.13333 | 95.45798 | -21.6638 | 0.64058  | -6.12174 | -29.571  | 3.976812 | -12.2203 | -15.0522 | 2.936234 | 3.092758 | 1.365219 | 0.800003 | 3.08696  | 0.878258 |
| Ethyl acetate 1 | 0.278261 | -1.49855 | -13.9623 | 36.04058 | 18.10145   | -80.458  | 10.46088 | 5.77681  | -1.08696  | 33.35652 | 27.07536 | -8.45507 | 27.64637 | 25.44348 | -7.22899 | 0.078261 | -1.46377 | -9.85797 | 0        | -3.77971 | -6.73044 | 0.515945 | 1.77681  | 0.713043 | 0.031891 | 1.072464 | 3.878262 |
| Ethyl acetate 3 | 0.118841 | -1.76232 | -21.1217 | 47.88985 | 21.2087    | -86.8058 | 7.13913  | 4.420288 | 0.028984  | 21.92174 | 18.70725 | -5.97101 | 29.14493 | 27.55362 | -8.85507 | 0.066667 | -1.75652 | -11.5739 | 0        | -4.02319 | -7.25217 | 1.353622 | 0.634781 | 0.968124 | 0.107254 | 1.040581 | 4.449276 |
| Ethyl acetate 4 | -0.04348 | -2.13623 | -15.7391 | 32.64928 | 18.87826   | -92.3565 | 7.014496 | 3.623184 | -0.02029  | 27.2058  | 21.60001 | -7.66667 | 28.13043 | 24.27826 | -7.86087 | 0.046377 | -1.84638 | -13.4841 | 0        | -3.91015 | -8.32755 | -0.73914 | -0.59421 | -0.57101 | -1.0029  | -0.27827 | 3.113045 |
| Ethyl acetate 5 | -0.07356 | -1.6116  | -19.4319 | 43.50724 | 19.96812   | -85.8927 | 4.113037 | 3.408707 | -0.34782  | 15.90344 | 13.90434 | -4.56812 | 25.90724 | 24.45507 | -7.42319 | 0.008696 | -1.08406 | -12.8116 | 0        | -3.5971  | -5.43768 | 0.944916 | 1.655075 | 0.591309 | -0.45506 | -0.55652 | 4.217392 |
| Ethyl acetate 5 | -0.01739 | -1.95073 | -16.6841 | 36.88696 | 17.74203   | -86.1623 | 4.434784 | 2.217392 | -0.70145  | 26.46666 | 20.59709 | -8.57101 | 24.04347 | 21.15363 | -7.44058 | 0.005797 | -1.29855 | -13.7304 | 0.005797 | -4.43189 | -8.14783 | 0.089859 | -0.33623 | -1.48406 | -1.36812 | -1.07246 | 1.18261  |
| Isopropanol 1   | -0.01739 | -4.15072 | -8.77972 | 0.208696 | -0.02898   | -31.2609 | 5.25798  | -0.51885 | -4.5942   | 16.23189 | 11.0058  | -5.67247 | 15.27246 | 13.08696 | -9.97971 | 0.084058 | -2.88985 | -5.73912 | 0        | -0.02898 | -5.35072 | -0.68405 | 0.939133 | -0.46029 | -8.86377 | -4.89275 | 1.895649 |
| Isopropanol 2   | 0        | -4.8     | -11      | 0.086957 | -0.41159   | -37.2609 | 7.979706 | -0.04059 | -4.77101  | 16.08984 | 11.67246 | -7.69565 | 15.37392 | 12.71594 | -4.94783 | 0.518841 | -1.36522 | -6.91306 | 0        | -3.45217 | -5.90146 | -0.68407 | -1.05507 | -5.04637 | -5.09856 | -11.3623 | 3.373917 |
| Isopropanol 3   | -0.23188 | -5.59131 | -8.52464 | 0.368116 | -0.93333   | -41.5913 | 7.286957 | -0.43767 | -4.88116  | 19.86955 | 14.97681 | -7.5971  | 16.16811 | 13.83479 | -6.38261 | 0.046377 | -2.5942  | -8.77681 | 0.194203 | -4.02319 | -8.80579 | -0.58261 | -1.28696 | -9.67827 | -7.75072 | -15.1739 | 5.666668 |
| Isopropanol 4   | 0        | -5.13623 | -3.97681 | 0.376812 | 0.072464   | -36.4377 | 6.652176 | 0.249268 | -4.11884  | 19.08116 | 12.54494 | -7.16522 | 18.27466 | 15.55362 | -5.74493 | 0.017391 | -2.26377 | -7.59421 | 0        | -3.22898 | -4.6145  | 1        | -0.31895 | -6.46088 | -4.28116 | -10.2087 | 2.356522 |
| Isopropanol 5   | 0.055072 | -4.76522 | -6.53623 | 0.834783 | 0.034782   | -39.1942 | 5.707245 | -2.45218 | -5.47247  | 19.31015 | 12.89856 | -6.43189 | 19.18841 | 16.4087  | -6.3913  | 0.263768 | -2.12464 | -9.91304 | 0        | -3.92754 | -10.1304 | 0.53334  | -0.98262 | -11.2956 | -4.09566 | -11.5681 | 0.550724 |
| MEK 1           | 11.30435 | 21.55072 | -85.0957 | 128.542  | 56.88116   | -125.012 | 13.92174 | 10.07826 | -0.38551  | 38.13913 | 28.72754 | -11.2812 | 74.8232  | 74.09855 | -17.6203 | 0.350725 | -4.36232 | -31.6667 | 0.017391 | -10.3188 | -13.4464 | 0.979706 | 1.681152 | -1.78841 | -0.3913  | 0.860867 | 4.585506 |
| MEK 2           | 9.043478 | 18.4     | -80.8058 | 127.3304 | 57.84058   | -128.481 | 13.95941 | 9.22319  | -0.64348  | 36.3768  | 27.04637 | -11.2348 | 79.15073 | 79.42029 | -19.7188 | 0.307246 | -4.33913 | -29.3739 | 0.055072 | -9.41449 | -12.7246 | 0.910156 | 0.162323 | -1.71102 | -0.12174 | -0.27826 | 4.614494 |
| MEK 3           | 8.504348 | 18.5942  | -81.3304 | 128.5942 | 59.57391   | -130.081 | 13.07536 | 10.31305 | -0.78261  | 37.56522 | 27.53043 | -11.1229 | 82.24347 | 81.04929 | -19.2812 | 0.142029 | -4.23219 | -30.0667 | 0        | -9.73623 | -13.5594 | 0.640579 | 0.568115 | -1.29565 | 0.797104 | 0.011589 | 3.475365 |
| MEK 4           | 7.915942 | 18.14203 | -79.8609 | 127.7391 | 55.38841   | -123.623 | 10.5797  | 8.73912  | 10.55652  | 32.54022 | -11.1478 | 70.40289 | 76.06957 | -17.6638 | 0.191304 | -4.03188 | -28.742  | 0        | -9.53333 | -13.9768 | 1.037689 | 0.765213 | 1.371017 | -0.97681 | -0.13333 | 3.643478 |          |
| MEK 5           | 18.13333 | 26.67247 | -89.5739 | 134.6435 | 53.37392   | -114.139 | 10.52754 | 6.988403 | 1.266666  | 28.69566 | 22.02898 | -7.94783 | 83.49564 | 87.39131 | -21.8377 | 0.110145 | -5.08985 | -26.8899 | 0        | -10.8899 | -14.858  | 1.698563 | 0.768112 | -0.10436 | 0.611588 | 0.31884  | 4.278259 |
| Styrene 1       | 14.50725 | 22.08986 | -84.171  | 141.6522 | 54.83768   | -121.768 | 4.901443 | 2.591309 | -0.83478  | 13.61739 | 11.64638 | -6.43189 | 27.55651 | 26.57971 | -9.26087 | 0.06087  | -1.92754 | -28.0029 | 0.194203 | -7.84927 | -17.742  | 0.588409 | -0.64926 | -1.77971 | -0.16812 | 0.046371 | 4.788406 |
| Styrene 2       | 7.956232 | 16.95072 | -74.3391 | 135.3449 | 54.13623   | -113.4   | 2.394196 | 2.794205 | -0.01597  | 9.110138 | 9.643478 | -0.01739 | 24.08116 | 23.52174 | -8.70435 | 0.156522 | -1.46377 | -29.1652 | 1.730435 | -6.62899 | -16.6493 | -0.61159 | 0.718842 | -2.21159 | 0.39711  | -1.73623 | 1.797096 |
| Styrene 3       | 8.669565 | 16.42609 | -73.4435 | 131.3913 | 52.67246   | -115.084 | 2.431885 | 4.252167 | -0.84058  | 12.23189 | 11.06957 | -5.27246 | 21.82029 | 21.19421 | -7.27536 | 0.127536 | -1.14493 | -24.4348 | 4.73913  | -5.94202 | -13.8783 | -0.55652 | -0.67537 | -1.04057 | -1.85797 | -0.51015 | 4.739132 |
| Styrene 4       | 7.646377 | 14.98261 | -67.7739 | 119.0493 | 50.47537   | -110.267 | 3.301453 | 4.405792 | -0.292755 | 10.10434 | 9.944931 | -1.13623 | 22.78841 | 22.63188 | -6.77391 | 0.182609 | -0.17971 | -23.6812 | 0.707246 | -3.84058 | -13.1304 | 0.831879 | 0.513046 | 1.547821 | 0.347824 | -1.6174  | 2.739911 |
| Styrene 5       | 8.026087 | 15.63479 | -71.6985 | 130.9246 | 53.84638   | -115.014 | 5.197113 | 5.518845 | -1.52464  | 14.0145  | 11.34203 | -3.75942 | 25.81738 | 25.77392 | -8.06377 | 0.049275 | -1.05217 | -22.4551 | 0.017391 | -6.04058 | -12.4783 | 0.800003 | -0.35942 | -1.07826 | -0.13913 | 0.005798 | 2.95652  |
| Acetone 1       | -0.01739 | -3.46956 | -6.57391 | 13.24058 | 8.828987   | -55.4638 | 8.295654 | 3.344925 | -1.23478  | 25.15942 | 21.29565 | -7.70725 | 18.30724 | 16.59711 | -5.26667 | 0.342029 | -1.16812 | -6.03479 | 0        | -0.23478 | -4.72174 | 1.199997 | 1.82608  | 0.41449  | -0.69855 | 0.536228 | 3.54203  |
| Acetone 2       | -0.02609 | -3.26377 | -4.89855 | 10.50725 | 7.144928   | -49.713  | 7.608704 | 3.823181 | -1.45797  | 24.60289 | 20.9884  | -7.64058 | 16.11594 | 14.24928 | -5       | 0.310145 | -1.08986 | -4.7827  | 0        | -2.36521 | -3.34493 | 0.426086 | 1.066666 | 1.031891 | -1.37102 | 0.362316 | 3.15942  |
| Acetone 3       | -0.12174 | -3.94203 | -6.0174  | 14.73913 | 7.721741   | -49.571  | 5.437683 | 2.452179 | -0.85507  | 22.29276 | 18.14783 | -6.37392 | 17.68695 | 15.85507 | -5.1913  | 0.008696 | -1.26087 | -5.57681 | 0        | -2.66377 | -3.08696 | 0.411591 | 1.075363 | 0.797104 | -0.84059 | 0.252174 | 3.857971 |
| Acetone 4       | -0.29855 | -3.73623 | -6.37681 | 15.95362 | 8.188408   | -51.1797 | 7.330429 | 2.257965 | -0.27826  | 22.9971  | 18.42029 | -6.21159 | 16.53913 | 14.54783 | -5.45218 | 0.008696 | -1.3942  | -6.1971  | 0        | -2.03188 | -4.97971 | 0.86377  | 0.153625 | -0.22029 | -0.44927 | 0.5942   | 3.507244 |
| Acetone 5       | -0.22319 | -3.22029 | -5.62029 | 13.74203 | 7.185509   | -46.8696 | 6.663773 | 2.828979 | -1.02899  | 21.62318 | 17.60291 | -5.06087 | 14.37392 | 12.29565 | -4.49276 | 0.005797 | -1.3913  | -5.92754 | 0        | -0.03478 | -4.41159 | 1.142029 | 0.446381 | -0.26376 | -1.09564 | 0.391304 | 3.124638 |
| Chloroform 1    | -0.05507 | -2.89855 | -9.52464 | 24.55072 | 12.44058</ |          |          |          |           |          |          |          |          |          |          |          |          |          |          |          |          |          |          |          |          |          |          |

|                 | R19       | G19      | B19      | R20      | G20      | B20      | R21       | G21      | B21      | R22       | G22      | B22      | R23      | G23      | B23      | R24      | G24      | B24      | R25      | G25      | B25      | R26      | G26      | B26      | R27      | G27      | B27      |
|-----------------|-----------|----------|----------|----------|----------|----------|-----------|----------|----------|-----------|----------|----------|----------|----------|----------|----------|----------|----------|----------|----------|----------|----------|----------|----------|----------|----------|----------|
| Control 1       | -0.11305  | 0.107246 | -0.21449 | 0.953613 | 0.162323 | -0.48985 | -0.47537  | -0.52174 | 1.156525 | 0         | -0.40869 | 0.327538 | 0.452164 | 0.110145 | 0.42029  | -0.63478 | -1.05217 | -0.4029  | -0.30435 | -0.59419 | -0.75942 | 0.257965 | -0.29565 | 0.028986 | -0.42899 | -0.3942  | -1.16521 |
| Control 2       | 0.513042  | 0.266666 | -0.51304 | -0.0174  | -1.71014 | 1.515942 | -0.28696  | -0.02029 | 1.315948 | -0.48406  | -0.57681 | 1.046379 | -0.11594 | -0.0087  | -0.4     | -0.51015 | -0.74783 | 0.626087 | -0.59131 | 0.260872 | 0.130435 | 0.408707 | 0.081158 | 0.028986 | -0.53622 | -0.0029  | -0.56813 |
| Control 3       | 0.026089  | -0.03768 | 0.002899 | -0.21159 | -0.34782 | 0.579712 | -0.739136 | -0.59709 | 0.063766 | 0.185501  | 0.347828 | 0.692749 | 0.075362 | 0.463768 | 0.017395 | 0.066667 | -0.52174 | -0.61739 | 0.362319 | 0.110138 | -0.15073 | 0.066667 | -0.6145  | 1.05217  | -0.31595 |          |          |
| Control 4       | -0.04348  | -0.54493 | -0.24058 | 0.005798 | -0.06957 | -0.47246 | -0.22899  | -0.54202 | 0.255081 | -0.07246  | -0.28986 | -0.91884 | 0.539124 | -0.04348 | -0.41739 | -1.14783 | -0.44638 | -0.87536 | -0.0174  | 0.066666 | 0.249276 | -0.05507 | -0.02319 | -0.15652 | 0.313049 | 0.014496 | -0.71594 |
| Control 5       | -0.22319  | 0.21739  | 0.927536 | -0.02319 | -0.10144 | -0.30145 | 0.153625  | 0.356522 | 0.13623  | -1.0058   | -0.28117 | 0.750725 | 0.718842 | 0.24058  | 0.063768 | -0.50435 | 0.231888 | 0.130435 | 0.020294 | -0.14783 | -0.11594 | 0.043472 | 0.066666 | 0.02029  | 0.260864 | -0.09564 | -0.90344 |
| Ethanol 1       | 1.562317  | 1.634783 | -0.43189 | 5.226089 | 0.330429 | -2.32464 | -0.07536  | 0.121735 | 0.376816 | 0.417389  | -1.39131 | -1.01159 | 1.901443 | 0.486957 | -0.82319 | -0.42899 | -2.41449 | -1.69275 | 0.527527 | -2.41449 | -2.65508 | 0.472458 | -2.90725 | 0.023189 | -0.63768 | -0.09564 | -1.35942 |
| Ethanol 2       | 1.153625  | 1.266666 | -0.43768 | 5.837677 | 2.020294 | -3.09855 | -0.82028  | -1.44058 | -0.32173 | -2.05798  | -0.74783 | -1.4     | 0.455063 | 0.568116 | -0.86667 | 3.692764 | 1.01738  | 0.48261  | 0.921753 | -2.88117 | -2.58261 | 0.324631 | -2.67826 | 0.869565 | -0.87825 | 0.571014 | -0.9884  |
| Ethanol 3       | 1.234779  | 1.811594 | -0.69856 | 4.084061 | 0.055069 | -1.8029  | 0.252182  | -1.35362 | 4.657974 | -0.06957  | -0.25508 | -1.42899 | 1.515945 | 0.547826 | -0.26377 | -0.06087 | -2.74204 | 2.257973 | 0.915939 | -2.5855  | -1.91594 | -0.10436 | -2.44058 | 0.93913  | 0.382599 | 0.553619 | 1.426086 |
| Ethanol 4       | 1.342026  | 1.692755 | -0.32174 | 7.107254 | 2.246384 | -1.31015 | 0.721741  | -0.11305 | 1.600006 | 0.495651  | -0.31014 | 0        | 1.982605 | 0.565217 | -0.83768 | 0.695648 | -1.81738 | 2.118839 | 2.046371 | -2.66956 | -2.49276 | 0.582611 | -1.66377 | 0.956522 | 0.115936 | 1.901443 | 0.785507 |
| Ethanol 5       | 1.084061  | 1.6029   | -0.36521 | 0.301453 | 0.08696  | -0.53043 | -0.76231  | 0.965225 | 1.889862 | 0.275375  | -0.13623 | -3.06957 | 0.985504 | 0.692754 | -0.93913 | 0        | -1.25217 | -2.30725 | 0.014481 | -1.37972 | -4.11594 | -0.03188 | -1.97392 | 2.049275 | 0.504349 | 0.211594 | 0.014481 |
| Ethyl acetate 1 | 0.449276  | 1.139131 | -0.35942 | 0.440582 | 0.026093 | -0.22319 | -5.56233  | -5.29565 | 1.202896 | 0.684052  | -1.3913  | -0.09275 | 0.86956  | 0.005797 | 0.150725 | 0.773911 | 0.44928  | -1.42319 | 0.802902 | -0.35942 | -1.04348 | 1.072464 | 0.330429 | 0.272464 | -0.59421 | -1.06377 | 0.939133 |
| Ethyl acetate 3 | 0.307251  | 0.84058  | -0.47247 | -0.92754 | 0.568115 | -0.76232 | 0.544937  | 0.049271 | 1.704346 | 0.507248  | 0.08696  | -2.04348 | 0.26667  | 0.049275 | 0.055072 | 0.704346 | -0.12174 | -1.13043 | -0.40579 | -0.44348 | -1.14493 | -0.46376 | 0.098549 | -0.04638 | 0.614487 | -0.45796 | 0.017395 |
| Ethyl acetate 4 | 0.756519  | 0.826087 | -0.35072 | 0.356522 | -0.829   | -0.33623 | 0.342026  | -0.16811 | 4.359421 | 0.214493  | -0.3884  | -0.26376 | -0.44058 | 0.014493 | -0.24928 | 0.153625 | -1.51015 | -1.33623 | 0.046371 | -0.95072 | -1.91015 | 0.559418 | -0.17391 | -0.18261 | -0.22899 | -0.28986 | -1.37683 |
| Ethyl acetate 4 | -0.0145   | 0.869564 | -0.24638 | -0.55652 | 0.211609 | 0.07246  | 0.133331  | 0.231888 | 1.295654 | -0.66666  | -0.3913  | -0.64638 | 0.385506 | 0.002899 | -0.29855 | -0.73624 | -0.89856 | -1.0058  | 0.026093 | -0.49855 | -0.74203 | 0.011597 | 0.437675 | 0.231884 | 0.289856 | 0.168106 | -0.76813 |
| Ethyl acetate 5 | -0.04058  | 0.431884 | -0.6     | -0.82898 | -0.53362 | -1.0058  | -0.91304  | 0.153625 | -0.12174 | -0.23189  | -0.65508 | -1.38841 | 0.266663 | -0.0058  | -0.12464 | -0.92464 | -1.85797 | -1.57391 | 0.072464 | -0.45507 | -1.64058 | -0.02899 | -0.44058 | -0.17681 | -1.28116 | -0.33333 | -0.38551 |
| Isopropanol 1   | -0.46956  | 0.50145  | -2.29855 | 7.713043 | 2.315948 | 2.875366 | 0.837677  | -2.43478 | -35.6087 | -0.1074   | 0.130432 | 1.168121 | -0.00869 | 0        | 1.197101 | 2.1768   | -0.52318 | 8.220287 | -1.71884 | -2.44058 | 9.173912 | -3.08986 | -2.47537 | -2.86667 | 0.44928  | 5.962326 | 0.026093 |
| Isopropanol 2   | 0.373913  | 0.655072 | -2.49275 | 8.924637 | 2.417389 | 0.205797 | 0.866669  | -4.07246 | -44.2406 | -0.75362  | -0.12174 | 2.330433 | -0.0087  | 0        | 0.15942  | -1.35362 | -4.90145 | 7.33913  | -1.2058  | -3.62319 | 8.249275 | -2.45798 | -1.49855 | -0.84928 | 0.084061 | 3.608704 | -0.85797 |
| Isopropanol 3   | 0.463768  | 0.257971 | -2.61449 | 9.466675 | 2.359421 | 0.202898 | 0.652176  | -6.43478 | -57.6464 | -2.57101  | -2.66667 | 2.997101 | 0.017387 | 0        | 0.2      | -2.6116  | -7.19711 | 5.315941 | -2.39999 | -4.6029  | 8.536232 | -2.56232 | -1.17391 | -2.02029 | -1.65508 | 3.214493 | -1.15653 |
| Isopropanol 4   | 0.443478  | 0.469565 | -2.34493 | 8.875366 | 2.756516 | 3.382608 | 2.078262  | -4.40291 | -57.8087 | -1.28696  | -0.23479 | 3.54493  | 0.747826 | 0        | 0.831884 | -0.34494 | -4.86956 | 6.733334 | -0.93333 | -4.1971  | 9.640583 | -2.14493 | -1.55652 | -3.90725 | 0.391312 | 5.678253 | 0.078262 |
| Isopropanol 5   | 0.686954  | 0.744927 | -3.5971  | 7.730423 | 2.962326 | 4.452175 | 2.228989  | -4.45798 | -69.7623 | -0.65508  | -1.43767 | 3.243481 | 0.855072 | -0.02609 | 1.394203 | -1.75653 | -7.58551 | 7.968117 | -0.42609 | -4.15363 | 10.17971 | -3.13043 | -1.12464 | -4.87536 | 0.800003 | 3.872467 | 0.281158 |
| MEK 1           | 0.47826   | 1        | -0.38551 | 0.13623  | 0.553619 | -0.68116 | -0.26666  | 0.394196 | 2.272461 | 0.368118  | -0.1074  | -0.9855  | 0.707253 | 0.011594 | -0.70145 | 0.791306 | -0.39421 | -2.46957 | -0.51883 | -0.24928 | -0.50725 | 0.617386 | -0.45508 | 0.649275 | -0.12174 | -1.68985 | 0.408691 |
| MEK 2           | 1.072464  | 1.075362 | -0.42319 | -0.24348 | 0.028976 | -0.43478 | 0.373917  | -0.10724 | 1.924637 | -0.22029  | -0.15071 | -0.38551 | 0.837677 | 0.011594 | -0.0087  | 0.144928 | -1.77103 | -0.45217 | -0.44928 | -0.15942 | -0.85217 | -0.02608 | -0.28986 | 0.489855 | 0.982605 | -1.10724 | -0.00868 |
| MEK 3           | 0.402897  | 1.15942  | -1.04057 | 0.855072 | 0.486954 | -1.12464 | 0.408707  | -0.02319 | 2.878265 | 0.733322  | 0.272461 | -0.97681 | 1.26667  | 0.066667 | -0.47536 | 0.188416 | -0.43189 | -1.38841 | 0.736237 | 0.040581 | -0.50435 | 0.513046 | -0.23478 | -0.2029  | -0.76231 | -0.08116 | 0.457977 |
| MEK 4           | -0.710148 | 1.2      | 0.344925 | 0.730423 | -0.28406 | -0.31594 | -0.20869  | 0.368118 | 3.434784 | 0.46376   | 1.168121 | -0.08695 | 0.527534 | -0.05507 | -0.1971  | -0.64638 | -0.6116  | -1.6058  | 1.162308 | 1.008698 | -0.12754 | 0.570372 | -0.2058  | 0.515942 | 0.211594 | 0.133331 | 1.191299 |
| MEK 5           | -0.00579  | 0.23768  | -0.22898 | 1.292755 | 1.614487 | -1.29855 | 2.252167  | 0.634781 | 4.01738  | 1.962326  | 0.289856 | -1.35362 | 1.344933 | -0.0058  | -0.29855 | 0.260864 | -0.78551 | -0.84348 | 2.237686 | -0.06087 | -1.2029  | 1.457962 | -0.13333 | -0.14783 | 1.17392  | -0.36232 | 1.405792 |
| Styrene 1       | 1.011589  | 1.08116  | -2.66956 | -0.22899 | -1.07826 | 0.399998 | -1.11305  | -0.62898 | -1.46956 | -0.46956  | -1.93623 | -3.19421 | -0.06667 | 0        | 0.318841 | -0.27246 | -3.64348 | -2.4087  | -3.10725 | -2.04638 | -2.43189 | -1.68407 | -1.48406 | 0.568115 | -2.0736  | -2.08696 | -0.90144 |
| Styrene 2       | 0.330429  | 0.733332 | -1.31594 | 0.872467 | -1.20001 | -0.88406 | -0.49275  | -0.0145  | -9.30444 | 0.67247   | -0.44928 | -2.43189 | -0.49565 | 0.391304 | 0.295651 | -0.87827 | -1.41161 | -2.32464 | -1.34493 | -0.10298 | -2.28406 | -0.8029  | -1.50145 | 0.590725 | -2.09854 | -1.11014 | -0.54782 |
| Styrene 3       | 0.637688  | 0.371016 | -1.74493 | 0.405792 | -1.5797  | -0.6087  | -0.85217  | -2.35072 | -1.31303 | -0.44638  | -2.50435 | -2.77971 | -1.50145 | 0.121739 | -0.03478 | -2.43478 | -2.8058  | -2.64638 | -0.87537 | -0.88406 | -3.11884 | -1.02319 | -1.45797 | 0.29565  | -1.35942 | -2.29565 | -0.1942  |
| Styrene 4       | 1.147827  | 1.034782 | 0.692757 | 1.605804 | 0.289856 | 0.52174  | 0.72464   | 0.736221 | -1.13913 | 0.214493  | 1.359421 | -1.31305 | 0.249268 | 0.04058  | 0.553623 | 0.25798  | -0.6348  | -0.71014 | 1.234787 | 0.324638 | -0.64928 | 1.486954 | -0.66087 | 0.440579 | 0.73912  | -0.39131 | -0.16812 |
| Styrene 5       | 0.521744  | 0.901449 | -0.35072 | 1.199997 | -0.31595 | -1.34782 | -0.07826  | -1.31595 | 0.87825  | -0.255081 | -0.57101 | -1.24928 | -0.22029 | -0.06087 | 0.205797 | -0.16522 | -1.28986 | -0.30768 | -0.35942 | -0.84638 | -0.91884 | 0.228989 | -1.66087 | 0.542029 | -0.35652 | -0.76231 | 1.576813 |
| Acetone 1       | 0.237679  | 0.811594 | -0.56812 | -0.8174  | 0.208694 | -0.37391 | 0.228989  | 0.092758 | 1.614502 | 0.008698  | 0.011597 | -0.97681 | 0.394203 | -0.01159 | -0.62029 | -0.07826 | -0.13623 | -1.36522 | 0.434784 | 0.060867 | -0.7971  | -0.11014 | 0.292755 | 0.49855  | 0.50145  | 0.234787 | -0.31883 |
| Acetone 2       | 0.643475  | 0.617391 | 0.092758 | -0.49565 | 0        | 0.017391 | 0.489868  | -0.1826  | 2.388412 | 0.295654  | -0.64348 | -0.38261 | 0.176811 | 0        | -0.3971  | -0.28116 | 0.295654 | -1.37971 | -0.0058  | 0.18261  | -0.90725 | 0.698563 | 0.321739 | 0.086957 | 0.968124 | 0.072464 | 0.301453 |
| Acetone 3       | 0.513039  | 0.68116  | -0.38261 | -0.9913  | -0.15071 | 0.110146 | 0.478256  | 0.402908 | 2.040588 | 0.026093  | -0.21739 | -1.46667 | 0.321739 | 0.002899 | 0.150725 | -0.11304 | 0.011597 | -1.63768 | 0.353622 | -0.21159 | -0.44638 | 0.194214 | 0.411598 | -0.07246 | 0.623199 | -0.629   | -0.03767 |
| Acetone 4       | 0.582611  | 0.547827 | -0.77971 | -1.08696 | 0        | -0.43768 | 0.243469  | -0.24059 | 1.692749 | 0.31015   | 0.150726 | -2.02029 | 0.907242 | 0.002899 | -0.52754 | -0.39711 | -0.30434 | -0.95072 | -0.1826  | -0.38261 | -0.76522 | 0.13623  | -0.33044 | 0.208695 | 0.376801 | -0.59419 | 0.663773 |
| Acetone 5       | 0.118843  | 0.275363 | 0.031883 | -1.31885 | -0.16811 | -0.47826 | 0.020294  | 0.002899 | 1.249268 | 0.295654  | -0.07246 | -1.17391 | 0.521736 | 0.002899 | -0.26667 | -0.71594 | -0.11594 | -0.95652 | -0.94203 | -0.71304 | -0.54203 | -0.88986 | -0.23769 | 0.217391 | 0.037674 | -0.66086 | 0.084061 |
| Chloroform 1    | 0.492752  | 0.869565 | -0.64058 |          |          |          |           |          |          |           |          |          |          |          |          |          |          |          |          |          |          |          |          |          |          |          |          |

|                 | R28      | G28      | B28      | R29      | G29      | B29      | R30      | G30      | B30      | R31      | G31      | B31      | R32       | G32      | B32      | R33      | G33      | B33      | R34      | G34      | B34      | R35      | G35      | B35      | R36      | G36      | B36      |
|-----------------|----------|----------|----------|----------|----------|----------|----------|----------|----------|----------|----------|----------|-----------|----------|----------|----------|----------|----------|----------|----------|----------|----------|----------|----------|----------|----------|----------|
| Control 1       | -0.1942  | -0.67246 | 0.979706 | 0.284058 | -0.46376 | 0.388412 | -0.33623 | -1.10144 | -0.21159 | -0.94492 | -0.86087 | -0.51885 | 0.249275  | 0.179703 | -0.24348 | -0.1913  | -0.88696 | -0.06667 | -0.20001 | -0.06667 | 0.452173 | 0.347828 | -0.45217 | 0.756531 | 0.510143 | -0.63768 | -0.98552 |
| Control 2       | 0.530434 | -0.14783 | 0.921741 | 0.411606 | -0.14783 | -1.13623 | -0.68115 | 0.565216 | 0.89566  | 0.023193 | 0.68985  | -0.08986 | 0.382607  | -1.01739 | 0.597107 | 0.278275 | 0.257965 | 0.257971 | -0.62318 | -0.55364 | -0.28696 | 0.405796 | -0.4     | -2.57391 | 0.472464 | -0.51884 | -1.06377 |
| Control 3       | 0.17971  | 0.13913  | 0.020294 | -0.1913  | -0.36811 | 1.049286 | 0.156525 | -0.02318 | 0.768112 | -0.25508 | -0.92464 | 0.159424 | -2.69566  | -1.24023 | -0.54710 | -0.80289 | -0.10144 | -0.02899 | -0.2029  | -0.08406 | -0.06087 | -1.57101 | -1.45508 | 1.568115 | 0.197102 | 0.057968 | 0.388412 |
| Control 4       | -0.06377 | -0.49275 | -0.50145 | 0.547821 | -0.70725 | -1.02899 | -1.29855 | -0.42319 | -0.59709 | 0.727539 | 0.263763 | -0.46957 | 0.556526  | -0.30145 | -1.31015 | -0.32465 | -0.77681 | 0.481159 | 0.075363 | -0.08986 | 0.130435 | 0.379709 | -0.07536 | -1.08695 | 0.034782 | -0.06087 | -0.66377 |
| Control 5       | -0.43478 | 0.055073 | -0.04927 | -0.07246 | -0.13044 | -0.23477 | -0.11595 | 0.742035 | -0.71884 | 0.043472 | -0.67825 | 1.040588 | -0.03768  | -0.25218 | -1.23767 | 0.727524 | -0.64638 | 0.304347 | -1.02899 | 0.286957 | 0.052174 | 0.286957 | -0.27247 | 0.46666  | 0.200001 | 0.092751 | -0.95363 |
| Ethanol 1       | -1.55362 | -1.12464 | -1.13623 | 2.255081 | 0.452171 | -1.76231 | -0.22029 | -0.78261 | -0.15363 | 0.1884   | 0.165222 | 0.330444 | -1.1913   | -1.06377 | -0.19421 | 8.86377  | 2.565216 | -2.35073 | -1.50435 | 0.217392 | 0.124638 | 0.075363 | -2.79102 | -11.4638 | 0.205795 | -2.2058  | -7.74783 |
| Ethanol 2       | -1.58841 | -0.55652 | -1.18261 | -0.79131 | 0.272465 | -2.0029  | -1.85217 | -1.58261 | -0.42609 | 0.124634 | -0.11884 | -1.28406 | -0.94783  | 0.472473 | -0.10434 | 8.417404 | 0.939313 | -0.01159 | -2.88985 | 1.075363 | -0.17971 | -0.10725 | -2.62318 | -12.4899 | -0.31304 | -2.90145 | -7.14493 |
| Ethanol 3       | -1.7942  | -0.8145  | -0.62898 | -0.75363 | 1.020294 | -0.13333 | 0.243484 | -0.22899 | 0.455078 | 0.05217  | 0.324646 | -0.41159 | -0.51015  | -0.53622 | -0.51595 | 7.968109 | 2.530426 | -2.82609 | -1.86377 | 0.336227 | 0.156522 | 0.484058 | -2.14203 | -10.513  | 0.623188 | -1.82609 | -5.92464 |
| Ethanol 4       | -1.28696 | -0.62029 | -0.49276 | -0.06667 | 1.052174 | -1.73622 | -0.71884 | 0.249283 | -1.0145  | 0.991302 | 0.536224 | 1.428986 | -1.05219  | 0.8116   | 0.562332 | 10.42897 | 2.408707 | -0.78261 | -1.19132 | 2.205795 | 0.272464 | 0.292751 | -2.86087 | -12.6841 | 0.315945 | -0.62608 | -6.87827 |
| Ethanol 5       | -0.87247 | -0.31304 | -1.31594 | 2.385498 | 0.344925 | -1.41449 | 0.437683 | 0.785507 | 1.588409 | 0.292755 | -0.28406 | -0.3971  | -0.94783  | 0.081161 | 1.628983 | 8.133331 | 1.50145  | 0        | -0.23477 | 0.626083 | 0.385507 | -0.22899 | -1.91014 | -8.78261 | 0.373913 | -1.55653 | -5.36812 |
| Ethyl acetate 1 | -0.10145 | -0.06957 | -0.67537 | 1.107254 | 0.446377 | 0.785507 | -0.11014 | 0.49855  | 0.304352 | 0.27536  | 0.588409 | 1.092758 | 0.411606  | 0.240585 | 0.628983 | 4.626083 | 1.185501 | 0        | 0.533325 | 0.962311 | -0.05797 | -0.23478 | -0.28986 | -1.57971 | -0.46377 | -1.44928 | -2.77392 |
| Ethyl acetate 3 | -0.02029 | -0.14783 | -0.95652 | 0.301437 | 0.324638 | 0.165222 | 0.171005 | -0.77971 | 0.075363 | -0.72464 | -0.37682 | 0.721741 | 0.234787  | 0.6203   | 0.58551  | 3.713043 | 0.240585 | 0        | -0.16522 | 0.237686 | 0.017391 | 0.223188 | -0.88696 | -1.68115 | 0.127537 | -1.68406 | -3.15073 |
| Ethyl acetate 4 | -0.21449 | -0.30145 | -1.24348 | 0.205795 | -0.14203 | -0.8232  | 0.553619 | -1.10725 | -1.30145 | 0.020279 | -1.46378 | 0.095657 | 0.675369  | -1.53914 | -0.79419 | 3.771011 | -0.11015 | -0.01449 | -0.34203 | -0.04057 | 0.371016 | -1.53623 | -2.78551 | 0.107246 | -2.00579 | -3.09855 |          |
| Ethyl acetate 4 | -0.5942  | -0.18261 | -0.8     | 1.133331 | 0.220291 | -0.06957 | -0.72464 | -0.2     | -0.66666 | -0.5942  | -0.06957 | 0.402893 | -0.457962 | 0.579712 | -1.26956 | 1.542038 | 0.950729 | -0.13333 | 0.295654 | 0.481155 | -0.04928 | 0.481159 | -0.66956 | -1.91884 | -0.29855 | -1.75652 | -2.62898 |
| Ethyl acetate 5 | -0.57971 | -0.22029 | -1.73043 | 0.008698 | -0.88116 | -2.22609 | -0.37972 | -1.17102 | -2.84639 | 0.060883 | -0.13913 | 0.469574 | -0.43189  | -0.07246 | 3.315933 | 1.985504 | -0.42609 | 0        | -0.06957 | 0.727539 | -0.02609 | 0.440578 | -1.11594 | -3.85507 | -0.76522 | -2.93913 | -3.75073 |
| Isopropanol 1   | -1.83478 | -0.3971  | 0.582611 | -54.6348 | 18.13913 | -0.3652  | -1.26956 | -4.33623 | -6.76521 | -1.37972 | -2.40289 | -5.93333 | -2.14637  | 0.710144 | -0.20899 | 1.939313 | -26.9362 | 0        | -5.48985 | -0.95943 | -0.0087  | 4.808697 | 0.942032 | -26.0986 | 4.22319  | -94.9420 | -20.6985 |
| Isopropanol 2   | -1.07536 | -0.35652 | 0.04348  | -46.9304 | 10.47536 | -0.93044 | -0.9913  | -7.06087 | -7.64928 | -0.95653 | -2.16522 | -5.8087  | -0.08406  | 0.805786 | -5.59421 | 3.127548 | -30.7855 | 0.133333 | -6.09566 | -1.8     | -0.04928 | 2.57971  | -1.10725 | -23.8319 | 2.42029  | -4.36522 | -15.8696 |
| Isopropanol 3   | -1.27536 | -1.09855 | 0.09565  | -55.1391 | 13.24638 | -2.36231 | -1.71884 | -7.2029  | -8.38261 | -1.64348 | -3.25217 | -8.3797  | 0.765213  | 1.113037 | -9.52463 | 0.420693 | -41.5855 | -0.09275 | -0.84046 | -2.41739 | 0.136232 | 5.2029   | -0.05217 | -31.9681 | 5.049274 | -2.2029  | -16.4348 |
| Isopropanol 4   | -1.28406 | -0.57971 | 1.176811 | -50.5739 | 14.31884 | 0.994202 | 1.391312 | -2.02029 | -2.16521 | -0.90436 | -1.57681 | -6.11304 | 1.078262  | 1.678253 | -9.95941 | 0.288299 | -32.116  | 0.121739 | -5.26666 | -0.61159 | 0        | 4.284058 | -0.25507 | -23.5971 | 0.701448 | -4.6058  | -15.6203 |
| Isopropanol 5   | -1.18551 | -0.64058 | 0.153625 | -58.6551 | 20.13913 | -1.88406 | -0.28696 | -5.33623 | -7.06087 | -0.03479 | -2.48985 | -6.70146 | 0.542038  | 2.052185 | -8.36812 | 6.617401 | -47.7043 | 0.089855 | -6.25798 | -1.91014 | -0.33044 | 7.304348 | 1.721741 | -32.658  | 3.782608 | -4.13623 | -17.0899 |
| MEK 1           | -0.10145 | -0.13333 | -0.57681 | 1.51593  | 0.191307 | -1.36232 | 0.228973 | 0.046387 | -0.60869 | -0.28696 | -0.33334 | 1.527542 | 0         | 0.159409 | 0.979721 | 3.150711 | -1.50725 | 0        | 0.373917 | 1.73912  | 0        | 0.794203 | -0.10725 | -4.22029 | 0.431885 | -1.37971 | -3.6087  |
| MEK 2           | -0.3913  | -0.36232 | -0.15652 | 1.707245 | -0.09855 | -1.04347 | 0.507248 | -0.77971 | 0.907242 | 0.121735 | 1.779709 | 0.684052 | -0.34782  | -0.32175 | -0.03188 | 3.576797 | -2.95363 | 0.008696 | -0.23479 | 0.626083 | -0.06957 | 0.44058  | -0.74203 | -4.80289 | 0.646378 | -1.37391 | -1.44058 |
| MEK 3           | 0.020289 | -0.09565 | -0.75362 | 1.53624  | 0.110146 | -0.71304 | 0.234787 | 0.524643 | -0.24059 | 0.023178 | 0.785507 | -0.28696 | -0.2058   | 0.333344 | -0.26088 | 3.840576 | -2.9971  | 0        | 0.118835 | 0.837677 | -0.08696 | 0.515942 | -0.51885 | -4.65797 | -0.21159 | -1.25217 | -2.44637 |
| MEK 4           | -0.09275 | 0.011593 | -0.65217 | 1.428986 | 0.368114 | 0.382614 | 0.339127 | 0.510147 | -0.91014 | -0.3971  | 1.486954 | -0.05508 | 0.869568  | 0.608704 | 1.428986 | 3.211594 | -0.96811 | 0.055072 | 0.088557 | 1.50145  | -0.03188 | 0.505194 | -0.37101 | -1.28552 | 0.440578 | -0.32754 | -2.68116 |
| MEK 5           | 0.057971 | -0.06667 | -0.71594 | 1.820282 | 0.052174 | 0.063766 | 0.684067 | -0.71304 | 1.191299 | 1.272461 | 0.785507 | 0.55072  | -0.02319  | 0.518845 | 0.785507 | 3.768112 | -2.31595 | 0        | 1.736237 | 0.86377  | -0.0058  | 0.382608 | -1.20001 | -3.28116 | 0.791306 | -1.30145 | -2.46956 |
| Styrene 1       | -1.04638 | -1.84348 | -1.76522 | -0.96521 | -0.5942  | -0.04347 | -0.05217 | -2.62029 | -0.43478 | -0.44928 | -1.66666 | -0.85217 | -1.34493  | -1.56522 | 0.011597 | 4.28463  | -0.9855  | -1.34783 | -1.36522 | -1.11884 | 0.8      | -0.32174 | -2.52174 | -16.2928 | 0.243477 | -3.47826 | -9.38261 |
| Styrene 2       | -0.65797 | -0.62319 | -1.44348 | -0.92464 | 0.356522 | -1.15653 | -0.28696 | -0.9884  | -0.07426 | -2.08406 | -1.46956 | -0.9913  | -1.11015  | -0.49855 | -0.92754 | 6.217392 | -1.59129 | 0        | -0.84638 | 0.252182 | 0.243478 | 0.052174 | -1.93263 | -15.0232 | -0.09855 | -1.91884 | -6.70435 |
| Styrene 3       | -0.48406 | -0.55072 | -0.96232 | -0.78261 | -0.62318 | -1.48406 | -1.56522 | -1.94783 | -2.70145 | -0.13335 | -1.10724 | -1.8087  | -1.3826   | -1.95943 | -0.0174  | 4.808701 | -1.08406 | -2.02029 | -0.41449 | -0.35362 | -0.94203 | -0.53913 | -3.11594 | -13.0957 | -0.21449 | -2.38261 | -9.57101 |
| Styrene 4       | -0.04928 | 0.208696 | 0.205795 | 0.243469 | 0.052177 | 1.927536 | 0.127548 | -0.11304 | 1.301453 | 1.066666 | 1.997101 | 2.304337 | 0.568115  | 0.707245 | 1.463776 | 7.1884   | -0.40289 | 0        | 0.805786 | 1.669571 | -0.18261 | 0.211597 | -1.78551 | -12.7768 | 0.084057 | -1.42899 | -5.31015 |
| Styrene 5       | -0.24058 | -0.20869 | -0.97681 | 0.252182 | 0.176811 | 0.249268 | -0.24057 | 0.263763 | -0.32463 | -0.65797 | 0.01738  | 0.878265 | -0.89856  | -0.50573 | -0.03767 | 5.336227 | -2.8696  | -0.0058  | -0.40579 | -0.52174 | -0.13623 | 0.710144 | -1.21449 | -10.2058 | -0.08986 | -1.49855 | -6.9913  |
| Acetone 1       | -0.21449 | -0.37391 | -0.27536 | 0.431885 | 0.052174 | -0.30435 | 0.002899 | -0.16811 | 0.681168 | -0.1884  | 1.002899 | 0.107239 | 0.281158  | 0.32753  | -0.14493 | 2.768112 | 0.365219 | 0        | 0.043488 | 0.910141 | -0.0087  | 0.02029  | -0.35652 | 0.147827 | 0.127535 | -1.05507 | -0.37681 |
| Acetone 2       | -0.0058  | -0.17681 | -0.27536 | 0.17392  | -0.12464 | 0.933334 | -0.75652 | 0.171021 | 0.997101 | -0.63478 | 0.73912  | -0.48116 | 0.640579  | 0.168106 | -0.08986 | 2.765213 | 0.376816 | 0        | 0.611603 | 0.852173 | 0.002899 | -0.08696 | -0.21449 | 0.994217 | 0.26087  | -0.43768 | -0.64927 |
| Acetone 3       | -0.14783 | -0.36232 | -1.23188 | 0.623184 | 0.191307 | 0.571014 | 0.023178 | 0.043488 | 1.052185 | -0.60291 | 0.127533 | -0.1855  | -0.77972  | 0.437683 | 0.779709 | 5.391296 | 1.298553 | -0.0029  | -0.15653 | 0.434784 | -0.02319 | -0.37391 | -1.28696 | -1.0029  | -0.2     | -1.32754 | -1.48695 |
| Acetone 4       | -0.16232 | -0.4058  | -1.96232 | 0.539139 | -0.1942  | -1.42319 | 0.382614 | 0.292755 | 1.368103 | -0.63768 | -0.26376 | -0.05219 | 0.005798  | 0.17392  | 0.17392  | 2.886963 | 0.037674 | 0        | 0.295654 | 1.069565 | 0.034783 | 0.284058 | -0.63768 | -1.49565 | 0.110146 | -1.25797 | -1.18261 |
| Acetone 5       | -0.16232 | -0.25217 | -1.89565 | 1.069565 | -0.35072 | -1.1942  | -0.66956 | -0.65218 | 0.197098 | -0.86377 | -0.27536 | -0.79131 | -0.36522  | -0.10146 | -0.53043 | 2.568115 | 0.27536  | 0        | -0.18262 | 0.701447 | 0.034783 | 0.208698 | -0.44348 | -1.51595 | -0.02319 | -1.08985 | -1.66377 |
| Chloroform 1    | -0.18551 | -0.14203 | -0.87247 | 0.507248 | 0.252174 | 1.252182 | 0.559433 | -0.09856 | 0.68985  | 0.       |          |          |           |          |          |          |          |          |          |          |          |          |          |          |          |          |          |

|                        | R1       | G1       | B1       | R2       | G2       | B2       | R3       | G3       | B3       | R4       | G4        | B4       | R5       | G5       | B5       | R6       | G6       | B6       | R7       | G7       | B7       | R8       | G8       | B8       | R9       | G9       | B9       |
|------------------------|----------|----------|----------|----------|----------|----------|----------|----------|----------|----------|-----------|----------|----------|----------|----------|----------|----------|----------|----------|----------|----------|----------|----------|----------|----------|----------|----------|
| Benzene 1              | -0.63188 | -0.16232 | 0.255073 | -1.63189 | -0.68696 | 0.139131 | -1.06667 | -0.38551 | -0.04348 | -0.91594 | -0.66957  | -0.09275 | -0.64058 | -0.23188 | -0.4058  | -0.07536 | 0.118841 | 0.710145 | 0.707246 | -0.5942  | -1.90726 | 0.768112 | -8.0029  | -4.45507 | 17.23768 | 9.536232 | -46.9101 |
| Benzene 2              | -0.54492 | 0.176811 | 0.130435 | -0.65508 | -0.69856 | -0.89565 | -0.25508 | -0.2058  | -0.9855  | 0.066666 | -0.45218  | 0.831882 | 1.315933 | 0.559425 | 0.910145 | 0.05217  | 0.533333 | 0.510145 | -0.14493 | -0.8087  | -1.35942 | 1.77681  | -10.7275 | -2.88116 | 14.87826 | 8.944927 | -42.5449 |
| Benzene 3              | -2.55942 | -2.61449 | 2.014493 | -5.25507 | -4.85507 | -4.12646 | -5.87537 | -4.64348 | -4.65507 | -5.45508 | -4.6      | -1.37971 | -4.84058 | -3.53623 | -0.91304 | -3.77102 | -2.88116 | 0.527536 | 0.031884 | -0.89565 | -3.14783 | -0.0058  | -14.8087 | -4.04348 | 18.53333 | 11       | -49.4435 |
| Benzene 4              | 0.301453 | -0.20869 | -0.88696 | -0.16232 | -0.43768 | -0.64058 | -0.66377 | -0.29276 | 1.733337 | -0.0029  | -0.15653  | -0.86377 | -0.49275 | -0.4029  | -0.54493 | -1.0174  | -0.24348 | -0.55362 | 0.353623 | -0.84638 | -2.35362 | 2.762314 | -15.0087 | -3.26377 | 14.64637 | 7.78261  | -44.3391 |
| Benzene 5              | 1.278267 | 1.634781 | 4.368118 | -1.10436 | -0.91884 | -1.30145 | -0.87537 | -0.91884 | -1.01449 | -0.71014 | -0.10145  | -0.4058  | -0.38551 | -0.74493 | 0.353622 | -0.97102 | -0.83188 | 1.031884 | 0.402899 | -0.73333 | -3.33623 | 1.344925 | -11.6812 | -3.84058 | 16.84638 | 9.988407 | -45.6667 |
| Toluene 1              | -1.92174 | -0.26957 | 0.023188 | -2.38841 | -0.57971 | -0.23188 | -2.42899 | -1.2087  | -0.8551  | -2.32754 | -0.02899  | 0.837681 | -0.86667 | 0.121738 | 1.452174 | -0.6087  | -0.14783 | 0.33913  | 0.794203 | -1.2029  | -9.6145  | 3.631882 | -38.2522 | -2.14493 | 37.02319 | 19.47246 | -84.8232 |
| Toluene 2              | -0.35942 | 0.623192 | 0        | 0.828979 | 0.513039 | 2.118835 | -0.44638 | 0.304344 | 0.113037 | 0.623184 | -0.09855  | 0.269566 | 0.96521  | 0.90435  | 0.759422 | 1.18261  | -0.10725 | 1.15942  | 0.052174 | -1.86087 | -6.55362 | 3.388412 | -27.2812 | -4.71594 | 34.05797 | 17.92174 | -83.4667 |
| Toluene 3              | -0.51015 | -1.48116 | -0.76232 | -2.01739 | -1.72753 | -1.58551 | -3.93623 | -3.16812 | -2.83768 | -3.83188 | -3.68116  | -2.97102 | -3.62029 | -3.27247 | -1.93913 | -1.93333 | -0.94493 | 0.231886 | 0.237681 | -0.75652 | -5.71884 | 3.330429 | -24.3304 | -6.17102 | 44.33913 | 27.98261 | -88.4638 |
| Toluene 4              | -1.61739 | -0.97102 | -0.0029  | 0.579712 | 1.255074 | 0.878262 | -0.1797  | 0.727539 | 0.701447 | -0.31305 | -0.43768  | 0.333332 | -0.36812 | -0.54492 | -0.06667 | -1.46087 | -0.70435 | 0        | 0.237681 | -1.25507 | -6.97681 | 3.426086 | -26.6609 | -9.31594 | 49.07536 | 32.37391 | -94.1217 |
| Toluene 5              | 0.344925 | 2.588402 | 1.518841 | 0.608704 | 0.260872 | 1.110146 | -0.54494 | 0.286957 | -0.1855  | 0.371017 | 0.736229  | 0.930431 | 1.011597 | 0.846375 | 1.220287 | 1.173912 | 0.165215 | 0.113044 | 0.513043 | -1.37971 | -7.15073 | 3.776825 | -29.2232 | -4.93913 | 34.64638 | 18.46087 | -83.0493 |
| HCHO 1                 | -1.2029  | 0.344929 | 1.788406 | 0.623199 | -0.42319 | 1.324638 | 0.405792 | 0.310143 | -0.30145 | 0.359421 | 0.321739  | 0.82029  | -0.15071 | -0.03188 | -1.28696 | -0.19421 | -0.04638 | 0.194203 | 3.750725 | -3.58841 | -47.971  | 6.950729 | -96.2609 | -11.7913 | 103.8725 | 113.8522 | -59.0928 |
| HCHO 2                 | -1.12463 | 1.028984 | 1.405797 | -0.08116 | -0.26088 | -0.25217 | 0.443481 | -0.29855 | 0.359421 | 0.733337 | -0.23479  | 0.034782 | -0.96523 | 0.666664 | -1.26667 | -0.11305 | 0.05217  | -0.1942  | 3.657971 | -4.01739 | -43.2899 | 6.002899 | -91.7507 | -16.142  | 102.942  | 111.5072 | -54.6174 |
| HCHO 3                 | -1.45797 | 1.344925 | 0.588406 | 0.066666 | -0.09276 | 0.823189 | 0.631897 | 0.373909 | 1.313049 | 0.162323 | 0.103447  | 0.800003 | -0.84058 | 1.084061 | 0.489857 | -0.06377 | 0.408691 | -0.14493 | 3.127536 | -2.44928 | -53.0116 | 5.176804 | -89.7449 | -3.96812 | 103.2348 | 113.9333 | -55.5015 |
| HCHO 4                 | -1.33623 | 1.130432 | 1.97971  | 0.27536  | 0.063766 | -0.18551 | 0.205811 | -0.11015 | -0.17102 | -0.02608 | 0.020287  | 0.559422 | -0.39312 | -0.18261 | -1.74203 | 0.663765 | 0.62899  | -0.15073 | 3.701449 | -3.77102 | -42.8232 | 6.231888 | -93.2406 | -13.7507 | 103.1449 | 112.4261 | -57.7362 |
| HCHO 5                 | -1.53334 | 0.86377  | 1.547827 | 0.756516 | -1.02028 | -0.40869 | 0.86377  | 0.002899 | 0.043472 | 0.452164 | -0.43478  | 0.715939 | -1.25798 | 0.924637 | -2.10435 | -0.18551 | -0.29565 | -0.11884 | 3.994203 | -3.93623 | -44.287  | 7.037674 | -96.0232 | -14.6058 | 106.6609 | 115.1884 | -58.9652 |
| 1,1,1 Trchloroethane 1 | -0.23189 | 0.771019 | -0.09855 | 1.350739 | 1.478256 | 1        | 1.724625 | 1.414497 | 1.246376 | -1.08986 | -1.66087  | -1.71049 | 1.304344 | 1.081158 | 0.568115 | -0.86377 | -0.16812 | -0.02609 | 0.057971 | -0.61159 | -0.68405 | 2.026093 | -3.75073 | -1.53044 | 5.414494 | 1.684057 | -13.4319 |
| 1,1,1 Trchloroethane 2 | 0.017395 | 0.484062 | -1.23768 | -0.40581 | 0.092758 | -0.37681 | 0.640579 | -0.15363 | -1.02319 | -0.30434 | -0.13913  | 0.121738 | 0.031883 | 0.623184 | 0.646376 | -0.55362 | -0.64058 | 0.078261 | -0.10725 | -0.86087 | -1.64638 | 0.91304  | -3.40869 | -1.93913 | 4.86087  | 2.04348  | -12.1102 |
| 1,1,1 Trchloroethane 3 | -0.74204 | 2.834785 | 3.344928 | -0.78841 | -0.34493 | -2.34782 | -0.43189 | -0.68696 | -1.85508 | -0.68695 | 0.649277  | -0.2058  | 0.388405 | 1.103447 | 1.29855  | 0.05217  | 0.269569 | -0.48406 | -0.06957 | -1.49565 | -2.70435 | 0.144928 | -1.26376 | -1.68406 | 4.443478 | 1.718842 | -12.1623 |
| 1,1,1 Trchloroethane 4 | 0.423195 | -0.50435 | -0.03188 | 0.336227 | 1.156525 | 0.562317 | -0.51595 | 0.41449  | -0.13333 | 0.008698 | -0.44347  | -0.22319 | -0.06957 | 0.202896 | 0.826088 | -0.12463 | 0.631882 | 0.156522 | -0.01449 | -1.76812 | -1.46088 | 0.834778 | -2.34782 | -2.83768 | 3.698551 | 1.304348 | -10.3449 |
| 1,1,1 Trchloroethane 5 | -0.4145  | 1.376816 | -0.14493 | 0.107254 | 0.814491 | -0.20869 | -0.25798 | 0.872467 | -1.89276 | 0.663773 | -0.23479  | -0.53623 | -0.10725 | 0.078262 | 0.246376 | -1.95942 | -0.09855 | -0.63478 | 0.353623 | -0.29855 | -1.51595 | -0.07246 | -1.0029  | -3.18261 | 4.107246 | 0.573914 | -11.5159 |
| p-Xylene 1             | 0.74202  | 2.05217  | 1.362319 | 1.394196 | -5.33044 | -9.95363 | -1.8174  | -1.95651 | -3.35362 | -1.14203 | 0.1017387 | 0.886955 | -1.76811 | -0.35362 | -0.02609 | -1.88985 | -0.78262 | 0.194202 | 0.527536 | -2.43768 | -11.5478 | 3.971008 | -32.1449 | -17.7072 | 81.15942 | 60.72464 | -104.403 |
| p-Xylene 2             | 0.339134 | 1.162315 | 0.055073 | 0.303479 | 2.420296 | 4.107246 | 1.266663 | 0.602898 | 1.295654 | 0.634781 | 0.472466  | 0.29855  | 0.046371 | 0.652176 | -0.50435 | -0.33044 | 0.321739 | -0.09565 | 0.594203 | -1.77971 | -10.5768 | 3.924637 | -32.0464 | -14.6464 | 73.0145  | 52.92174 | -100.571 |
| p-Xylene 3             | -0.63478 | 0.484055 | 1.217391 | 0.466675 | 1.10144  | 0.194206 | 0.191299 | 1.704346 | 3.150726 | -0.58261 | 0.414497  | -0.02319 | -0.95073 | -0.33913 | -0.62899 | -0.11594 | -0.18841 | -0.13623 | 1.046377 | -1.89855 | -8.53912 | 4.997101 | -29.8638 | -13.7246 | 74.74204 | 53.28696 | -99.3652 |
| p-Xylene 4             | -1.02898 | 0.852173 | -0.06377 | 0.434784 | -0.92174 | -0.30145 | -0.11885 | 0.272461 | 0.417389 | -0.61449 | -0.94783  | -0.53043 | 1.379715 | 3.924637 | -0.64058 | -1.26667 | -0.89565 | 0.707246 | -1.31594 | -10.9913 | 5.020279 | -36.0667 | -9.76232 | 70.6058  | 54.74783 | -99.3246 |          |
| p-Xylene 5             | -0.92754 | 0.469559 | 0.318841 | -0.54492 | -1.02898 | -1.18261 | -0.31595 | -0.09276 | -1.59999 | -0.45216 | -0.17101  | -0.31884 | 0.652176 | 0.005798 | -0.55072 | 1.678261 | 2.156517 | 0.373913 | 0.243478 | -1.86957 | -11.0928 | 4.489853 | -26.2609 | -19.2928 | 75.21449 | 55.22029 | -93.4145 |
| p-dichlorobenzene T1   | -1.67246 | 0.640579 | 0.408695 | 0.133331 | -0.43189 | -1.03189 | -0.0087  | 0.515938 | 1.217392 | -0.24927 | -0.14203  | -1.32754 | -1.56812 | 0.440582 | -6.44638 | -0.47537 | 0.513046 | 0.069565 | 0.26087  | -0.8087  | -5.84058 | 0.539124 | -4.53333 | -4.90725 | 15.48116 | 8.217392 | -35.9884 |
| p-dichlorobenzene T2   | -1.89276 | 0.768116 | 0.892755 | -1.62608 | -1.26088 | -0.31595 | -0.34493 | -0.24348 | 1.492752 | -1.0116  | -0.84927  | -1.11305 | -1.65218 | -0.10725 | -1.57681 | -1.20001 | -0.18551 | 0.13913  | -0.71304 | -4.11014 | -1.44058 | -3.91304 | -4.6     | 17.36812 | 10.02029 | -40.7072 |          |
| p-dichlorobenzene T3   | -1.93333 | 0.484058 | 0.286957 | -0.25218 | -0.6174  | -0.72464 | -0.48695 | 0.469566 | 0.739136 | -0.60001 | -0.61739  | -0.68406 | -0.96233 | -0.68695 | -4.79421 | -0.13913 | 0.571014 | -0.41449 | 0.336232 | -1.30435 | -6.92174 | -0.57101 | -5.74204 | -6.47826 | 14.64638 | 8.657974 | -39.1594 |
| p-dichlorobenzene T4   | -1.6087  | 0.388409 | -0.10145 | 0.205795 | 0.031891 | -0.93044 | -0.71884 | 0.631882 | 1.292755 | -0.75362 | -0.1971   | -0.14783 | -0.43478 | -0.49275 | -0.5797  | -1.0116  | 0.063774 | -1.27826 | 0.182609 | -1.14203 | -5.84927 | 0.240585 | -3.58841 | -5.33913 | 10.6116  | 5.594204 | -30.1304 |
| p-dichlorobenzene T5   | -1.13623 | 0.257973 | 0.434784 | -0.30725 | -0.10725 | -0.97682 | -0.40289 | 0.023186 | 1.973907 | -0.28116 | -0.82319  | 0.199997 | -0.12753 | -0.9884  | 0.846382 | -1.55652 | -0.05797 | -0.06667 | 0.078261 | -1.3942  | -2.57681 | -0.05797 | -4.48695 | -4.81739 | 12.11884 | 6.310146 | -30.2841 |
| Limonene T1            | -1.39131 | 0.921738 | 0.513043 | -0.24637 | 0.25798  | 0.32753  | -0.43478 | 0.94783  | -0.21449 | -0.16522 | -0.09855  | 1.298546 | -0.49275 | -0.40289 | 0.605797 | -0.69276 | 0.165215 | 0.246376 | 0.46087  | -1.10725 | -0.04347 | 1.217392 | -5.6116  | -8.55072 | 30.62029 | 20.06957 | -61.142  |
| Limonene T2            | -1.21449 | 0.075363 | -0.04638 | 0.089844 | -0.87827 | -1.29276 | -0.2029  | 0.214493 | -0.5855  | -0.41449 | 0.350731  | 0.628983 | 0.333328 | 0.426086 | -0.49275 | -0.24928 | 0.582611 | -0.57971 | 0.376812 | -1.26087 | -1.71594 | 1.698547 | -6.46086 | -7.2     | 29.22029 | 18.74203 | -57.9681 |
| Limonene T3            | -0.70145 | 0.034782 | -0.46957 | -0.69565 | 0.524643 | -0.0116  | -0.14783 | 0.376816 | -1.23477 | -0.49855 | -0.63768  | 0.428986 | -0.45216 | -1.38841 | -0.81739 | -0.43478 | 0.202896 | 0.243477 | 0.110145 | -1.06667 | -1.26956 | 1.043488 | -4.85797 | -8.22319 | 29.72464 | 18.76232 | -59.7739 |
| Limonene T4            | -0.49855 | 0.423187 | 0.084059 | 0.121735 | 0.144928 | -0.78551 | -0.14493 | 0.672462 | -0.96523 | -0.11304 | 0.350723  | 1.440575 | 0        | 0.324646 | -0.17681 | -0.64058 | 0.295654 | 0.284058 | 0.437681 | -0.87826 | -2.96812 | 1.313034 | -5.85797 | -7.55072 | 27.03189 | 17.15942 | -58.2638 |
| Limonene T5            | -0.67246 | 0.255074 | -0.09855 | -0.17972 | 0.031891 | -0.02608 | -0.3855  | -0.18261 | -0.47246 | -0.42609 | 0.188408  | 0.356522 | 0.10434  | -0.0087  | -0.21449 | -1.95652 | -0.35652 | -0.08986 | 0.382609 | -0.57971 | -1.11884 | 1.507248 | -5.08696 | -9.64638 | 31.83189 | 21.26667 | -63.3275 |
| Camphene 1             |          |          |          |          |          |          |          |          |          |          |           |          |          |          |          |          |          |          |          |          |          |          |          |          |          |          |          |

|                      | R10      | G10      | B10      | R11      | G11      | B11      | R12      | G12      | B12      | R13      | G13      | B13      | R14      | G14      | B14      | R15        | G15      | B15      | R16      | G16      | B16      | R17      | G17      | B17      | R18      | G18      | B18      |
|----------------------|----------|----------|----------|----------|----------|----------|----------|----------|----------|----------|----------|----------|----------|----------|----------|------------|----------|----------|----------|----------|----------|----------|----------|----------|----------|----------|----------|
| Benzene 1            | 0.069565 | 1.620291 | -11.4667 | 36.74493 | 17.65797 | -37.7015 | 2.956528 | 0.837677 | -1.30725 | 3.185501 | 2.614502 | 0.62899  | 10.42899 | 21.6232  | -3.17391 | 0.492753   | -1.4     | -3.22319 | 0.892754 | -2.52464 | -3.81448 | 0.092758 | 0.898544 | -1.50145 | 0.26088  | -0.94493 | -0.81739 |
| Benzene 2            | 0.046377 | 1.799999 | -10.1623 | 35.51884 | 16.31014 | -38.2667 | 2.759415 | 0.072464 | -1.2029  | 3.643478 | 2.884048 | -1.23478 | 10.08894 | 20.22029 | -3.6116  | 0.713043   | -1.79131 | -2.90724 | 1.704348 | -2.23479 | -2.55072 | 1.26088  | -0.96521 | -1.03188 | 0.785507 | 0.515495 | 2.046371 |
| Benzene 3            | 0.524638 | 2.373913 | -12.2087 | 38.47826 | 15.89855 | -40.3362 | 1.823196 | -0.72463 | -2.11884 | 2.13913  | 0.94783  | -1.28986 | 11.8145  | 23.72174 | -5.19131 | 0.362318   | -2.13913 | -2.71304 | 1.49855  | -2.84638 | -4.34782 | -0.24348 | -1.73044 | -4.17682 | -0.28406 | -2.08405 | -1       |
| Benzene 4            | 0.023188 | 1.675362 | -10.0551 | 35.28696 | 15.59711 | -32.8493 | 3.60289  | 1.49855  | -1.25507 | 5.788406 | 4.924637 | -1.16232 | 13.13913 | 27.22609 | -3.70725 | 0.695652   | -1.53044 | -1.08116 | 1.49855  | -2.02609 | -2.70725 | 0.286957 | 0.084061 | -0.90436 | 0.614502 | 0.884064 | 1.011597 |
| Benzene 5            | -0.07536 | 1.411592 | -10.2261 | 32.30724 | 15.25797 | -33.3681 | 3.10434  | 1.168106 | -0.61739 | 4.197098 | 4.228989 | -1.80869 | 11.09276 | 22.08405 | -4.06957 | -0.16232   | -1.17971 | -2.63478 | 0.953623 | -2.1826  | -3.38841 | 0.101456 | -0.05797 | 1.298553 | 0.475357 | 1.1884   | 0.495651 |
| Toluene 1            | 0.249275 | 4.660868 | -38.513  | 64.89275 | 38.2     | -79.3826 | 4.144928 | 1.794205 | -1.0087  | 8.118835 | 7.826208 | -0.64638 | 22.71014 | 47.78551 | -5.82319 | 0.550724   | -3.45217 | -8.62898 | 1.034378 | -5.96232 | -11.6783 | 0.710144 | 0.457962 | -1.67246 | -0.26666 | -0.75942 | -0.92174 |
| Toluene 2            | 0.368116 | 3.988405 | -37.1652 | 60.44058 | 37.04058 | -76.1855 | 5.202896 | 2.049286 | -0.53333 | 8.715942 | 7.640579 | -0.02029 | 24.54492 | 49.80869 | -5.11884 | 1.533333   | -1.85217 | -8.53624 | 0.585507 | -4.84927 | -8.79131 | 0.898544 | -0.38261 | -0.49565 | 1.678268 | 2.289848 | 1.220291 |
| Toluene 3            | 0.188406 | 4.539129 | -33.3797 | 74.14783 | 34.16522 | -66.1362 | 6.550735 | 3.321747 | -0.8116  | 10.84058 | 9.333344 | -1.91305 | 26.43768 | 54.26086 | -5.05507 | 1.257971   | -2.24928 | -5.35652 | 1.672464 | -3.71884 | -4.9884  | 1.324646 | 1.182602 | 0.46376  | 1.556519 | 1.388405 | 0.113045 |
| Toluene 4            | 0.011594 | 4.121738 | -32.2406 | 57.97391 | 33.09855 | -76.3913 | 6.46376  | 3.41449  | -1.2058  | 11.57971 | 8.843475 | -4.29276 | 23.90726 | 49.14493 | -5.29855 | 1.330435   | -1.68696 | -6.6087  | 0.568116 | -4.11594 | -8.13913 | 0.194199 | 0.168121 | -1.75072 | 0.89856  | -1.17681 | -1.73044 |
| Toluene 5            | 0.336232 | 4.028986 | -37.3188 | 60.61449 | 37.09275 | -75.6319 | 5.342026 | 1.823181 | -1.76812 | 8.034775 | 7.13913  | 1.217392 | 24.35942 | 49.69855 | -5.12464 | 1.507246   | -1.84927 | -8.55652 | 0.727536 | -4.77971 | -8.79421 | 0.892746 | -0.33334 | -1.0116  | 2.043488 | 1.36232  | 0.475365 |
| HCHO 1               | 166.9449 | 105.5942 | -125.606 | 110.3797 | 42.15073 | -26.5304 | 2.275375 | -1.23189 | -1.96812 | 2.460876 | 1.907242 | 0.791306 | 18.76811 | 26.71304 | -6.54203 | 6.147825   | 1.771011 | -23.313  | 36.52754 | 8.918839 | -21.1942 | 1.657974 | -0.06087 | -1.01738 | 1.150726 | -0.38551 | -0.18261 |
| HCHO 2               | 157.2493 | 109.2725 | -125.351 | 110.5536 | 43.11885 | -25.2145 | 1.234787 | -0.41739 | -1.97971 | 1.895645 | 1.669556 | 1.034782 | 17.46086 | 26.9884  | -6.0029  | 4.246378   | 1.504349 | -20.3971 | 31.93623 | 9.208694 | -22.3971 | 1.005798 | 0.834778 | -0.08696 | 1.289856 | -0.06377 | -0.23188 |
| HCHO 3               | 166.5507 | 105.6957 | -117.713 | 118.1739 | 46.1942  | -27.5362 | 2.159424 | -0.98552 | -1.25797 | 1.01738  | 1.782608 | 0.675362 | 19.17102 | 26.68405 | -5.7913  | 6.555073   | 1.81739  | -20.9333 | 37.47826 | 11.23477 | -24.5565 | 1.573914 | 0.802887 | 0.27536  | -0.25507 | -0.97102 | -0.3942  |
| HCHO 4               | 158.2261 | 105.2174 | -120.243 | 110.6145 | 42.6058  | -26.8261 | 1.82608  | -0.83478 | -1.76232 | 2.510147 | 1.356522 | 0.68985  | 18.45798 | 28.04349 | -6.3971  | 5.463768   | 1.582603 | -19.313  | 31.89855 | 8.072464 | -20.0493 | 1.353638 | 0.049271 | -0.43189 | 0.423187 | -0.47247 | 0.301449 |
| HCHO 5               | 164.1102 | 113.3623 | -128.557 | 121.4609 | 48.06957 | -31.229  | 2.368103 | -0.75942 | -2.73623 | 2.643478 | 2.623184 | 2.240585 | 20.56812 | 30.40289 | -6.41159 | 5.988405   | 1.657974 | -21.9362 | 36.17971 | 8.55072  | -20.6435 | 1.869568 | 1.176819 | -0.59421 | 1.214493 | -0.76231 | -0.43768 |
| 1,1,1 Tchlroethane 1 | 0        | 0.736233 | -2.59999 | 5.507246 | 2.715942 | -14.0493 | 2.460861 | 0.866669 | -2.49275 | 2.826096 | 2.307251 | -1.14783 | 6.41449  | 9.800003 | -3.14493 | 0.405797   | -0.74203 | -1.42609 | 0.330435 | -0.88985 | -1.17392 | 0.03769  | 0.637695 | -0.23477 | 1.194199 | 0.394196 | 0.892754 |
| 1,1,1 Tchlroethane 2 | 0        | -0.1971  | 0.495651 | 4.391304 | 0.869568 | -12.0812 | 1.626083 | -0.13913 | -1.84058 | 1.771011 | 2.063766 | -1.53333 | 4.25798  | 7.904343 | -2.38261 | 0.646377   | -0.76812 | -1.67537 | 0.646377 | -1.33334 | -0.88406 | -0.55362 | -0.64058 | 0.878265 | 0.084061 | 1.188416 | 2.049278 |
| 1,1,1 Tchlroethane 3 | 0.014493 | 0.744928 | -1.50145 | 4.011594 | 1.646378 | -10.5594 | 3.492752 | 0.666672 | -1.44638 | 0.226089 | 1.318832 | -1.31304 | 3.344925 | 7.953629 | -2.64348 | 0.666668   | 0.046379 | -0.97682 | -0.03478 | -1.93044 | -2.33044 | 0.014496 | 0.750717 | -0.52174 | 0.484055 | 1.414505 | 0.5942   |
| 1,1,1 Tchlroethane 4 | 0.063768 | 0.68116  | 0.014496 | 4.075362 | 1.495651 | -9.37102 | 1.492752 | -0.25217 | -1.51884 | 2.237671 | 0.936234 | -1.38551 | 3.86087  | 6.530441 | -2.53333 | 0.217392   | -1.09855 | -1.65508 | 0.095652 | -1.12753 | -0.23479 | 0.208694 | -0.13623 | 0.162308 | -0.21739 | -0.26086 | -0.42319 |
| 1,1,1 Tchlroethane 5 | -0.01739 | 0.565216 | -0.33043 | 4.866667 | 2.17392  | -10.7855 | 1        | 0.889847 | -2.0029  | 1.684052 | 2.321747 | -1.98551 | 3.739136 | 8.457977 | -2.64927 | 0.194202   | -0.68696 | 0.008698 | 0.06087  | -1.69856 | -0.14203 | -0.23189 | 0.623184 | 1.266678 | 0.110153 | 2.133331 | 1.269577 |
| p-Xylene 1           | 3.037681 | 14.51594 | -65.5333 | 107.0696 | 46.7942  | -83.1942 | 2.063766 | 0.797104 | -0.46087 | 4.944931 | 5.544922 | 0.124634 | 18.77681 | 41.32173 | -5.09566 | 1.982608   | -2.14203 | -10.6522 | 3.26087  | -5.90144 | -9.6087  | -1.05217 | -1.3942  | -2.46378 | -1.76233 | -1.73044 | -0.21449 |
| p-Xylene 2           | 0.031884 | 8.252174 | -52.7362 | 99.20001 | 44.94203 | -78.8116 | 3.617401 | 2.547821 | 0.547827 | 4.371017 | 4.947815 | -0.94783 | 20.63768 | 44.27536 | -4.25798 | 1.565217   | -1.72174 | -6.8174  | 3.252174 | -5.72464 | -7.28116 | -1.07536 | -1.10725 | -3.22319 | 0.631882 | 1.542038 | 1.698547 |
| p-Xylene 3           | 1.672464 | 11.48695 | -55.0493 | 101.4232 | 44.97392 | -78.4956 | 3.237686 | 2.60289  | 0.084059 | 5.559418 | 5.1884   | 0.521736 | 21.81738 | 44.97681 | -6.64638 | 2.614493   | -1.00579 | -7.50725 | 0.408955 | -5.54783 | -7.76521 | 1.428986 | -0.23479 | 0.698547 | 0.921738 | 1.304032 | 0.634781 |
| p-Xylene 4           | 0.39311  | 10.53044 | -56.942  | 109.5594 | 50.69856 | -86.6406 | 5.240585 | 3.049271 | -0.26956 | 8.852173 | 5.098557 | 0.368111 | 21.50145 | 43.22609 | -4.23188 | 2.397101   | -1.86087 | -6.75073 | 3.872464 | -6.17681 | -8.12465 | 1.736237 | 0.417389 | -1.1739  | 0.979706 | -0.24348 | 0.660873 |
| p-Xylene 5           | 1.243478 | 10.43768 | -55.2232 | 98.69856 | 46.50435 | -79.4435 | 3.324631 | 3.588394 | 1.02319  | 5.63768  | 4.692749 | -0.15942 | 20.36812 | 42.43189 | -3.54783 | 1.724637   | -1.64638 | -8.68695 | 3.017391 | -5.24638 | -7.23189 | 0.852173 | 0.904358 | -1.3826  | 1.185501 | 0.713043 | 0.588409 |
| p-dichlorobenzene T1 | -0.06957 | -1.68116 | -15.7391 | 22.38551 | 10.14203 | -41.3971 | -0.98262 | -1.64638 | 5.110146 | 5.231873 | 3.797104 | -1.81739 | 15.5826  | 16.24638 | -0.21449 | 0.005797   | -0.6     | -6.8203  | 0.092754 | -1.85507 | -5.11305 | -0.0058  | 0.779709 | -2.09854 | -0.55652 | 0.785507 | 2.202896 |
| p-dichlorobenzene T2 | 0.113043 | -1.28116 | -20.3942 | 16.5971  | 7.765221 | -39.6058 | -0.95073 | -2.27246 | 3.808693 | 5.191299 | 4.533325 | -2.04058 | 13.53912 | 14.89275 | 0.202896 | 0.081159   | -0.65797 | -11.458  | 0.052174 | -1.16811 | -7.69275 | 0.347824 | -0.71304 | -0.62318 | -1.95363 | -1.70725 | 3.85218  |
| p-dichlorobenzene T3 | -0.25217 | -3.02319 | -13.2696 | 27.56232 | 12.70435 | -46.342  | -0.43189 | 0.614487 | 3.82029  | 3.118835 | 3.034775 | 3.620285 | 22.90434 | 25.39131 | 5.200001 | 0.011594   | -0.58551 | -9.8174  | 0        | -1.93333 | -6.89854 | 0.472458 | -0.25798 | 0.646378 | -0.97102 | 0.762314 | 4.562321 |
| p-dichlorobenzene T4 | -0.13333 | -2.52174 | -10.7072 | 18.08406 | 7.68116  | -35.9855 | -2.10146 | -1.3855  | 6.365215 | 4.823196 | 3.686951 | -0.28406 | 19.48696 | 21.0174  | 4.13913  | -0.0029    | -1.23188 | -4.88986 | -0.0058  | -2.04638 | -3.08696 | 0.292755 | 0.194199 | 0.997101 | -1.34782 | 1.09565  | 3.510147 |
| p-dichlorobenzene T5 | -0.14493 | -3.31884 | -10.6522 | 14.02609 | 4.614494 | -28.9623 | 0.060867 | 0.049271 | 2.150726 | 3.968109 | 1.828979 | -2.66666 | 9.831886 | 9.571014 | -1.51014 | -0.02029   | -1.24348 | -3.67827 | 0        | -3.16811 | -3.58841 | 0.115952 | 0.046371 | -1.04347 | -1.03767 | 1.631882 | 3.11594  |
| Limonene T1          | 0.327536 | 0.060867 | -20.5246 | 34.29276 | 15.79421 | -59.713  | 1.620285 | 3.249268 | -0.42029 | 5.426086 | 5.579712 | -1.23769 | 12.9971  | 13.85217 | -3.05507 | -0.0087    | -1.2116  | -9.0029  | 1.571015 | -2.62029 | -4.31883 | 0.63768  | 0.51593  | 0.234787 | 0.243484 | 1.266663 | 3.307247 |
| Limonene T2          | 0.04058  | -1.11884 | -17.1942 | 31.63768 | 16.55073 | -66.0203 | 2.13913  | 1.94783  | -0.94783 | 5.24057  | 3.614487 | -1.53044 | 13.2058  | 13.79421 | -3.62029 | 0.002899   | -1.52754 | -8.96231 | 0.008696 | -2.27246 | -4.7971  | 0.513046 | 1.472827 | -0.40869 | 0.495651 | 0.831886 | 3.269562 |
| Limonene T3          | 0.417391 | 0.350727 | -18.6493 | 32.53333 | 13.66956 | -53.0811 | 2.150726 | 2.240585 | 0.040573 | 6.472458 | 5.527542 | -1.86667 | 11.38841 | 11       | -5.28116 | 0.011594   | -1.13623 | -8.18552 | 0.153623 | -3.86087 | -5.27246 | -0.0116  | 0.072464 | -0.66666 | 1.017395 | 1.197098 | 1.962318 |
| Limonene T4          | 0.002899 | -0.30145 | -16.8435 | 35.03478 | 15.95362 | -60.313  | 1.197098 | 2.333328 | -1.2029  | 5.423187 | 4.721725 | -2.42899 | 12.2     | 12.67826 | -4.1884  | 0.072464   | -0.95363 | -8.12174 | 0.02029  | -2.91014 | -6.30724 | -0.26376 | 0.933334 | -0.9855  | -0.03479 | 1.208694 | 0.530434 |
| Limonene T5          | 0.110145 | 0.057972 | -18.6783 | 40.37391 | 17.0174  | -59.7217 | 1.443466 | 1.701462 | 0.301453 | 3.707245 | 4.86377  | -1.66087 | 9.191307 | 10.03478 | -2.98841 | -0.01449</ |          |          |          |          |          |          |          |          |          |          |          |

|                      | R19      | G19      | B19      | R20      | G20      | B20      | R21      | G21      | B21      | R22      | G22      | B22      | R23      | G23      | B23      | R24      | G24      | B24      | R25      | G25      | B25      | R26      | G26      | B26      | R27      | G27      | B27      |
|----------------------|----------|----------|----------|----------|----------|----------|----------|----------|----------|----------|----------|----------|----------|----------|----------|----------|----------|----------|----------|----------|----------|----------|----------|----------|----------|----------|----------|
| Benzene 1            | 1.666664 | 0.811594 | -0.51305 | -0.76231 | -0.2     | -0.03189 | -0.05797 | -0.05217 | 1.269562 | -0.42029 | -0.8     | 0.623188 | 0.191299 | 0.130436 | -0.71884 | 0.55072  | -1.0087  | -0.03478 | -0.34493 | -0.26667 | 0.866667 | -0.23769 | 1.472458 | 0.486954 | 0.173904 | -0.06667 | -0.45506 |
| Benzene 2            | 1.18261  | 0.397102 | -0.43478 | -0.47826 | -0.55943 | -0.48696 | 0.107239 | 0.072464 | 0.979706 | -0.59421 | -0.44927 | 0.507248 | 0.72464  | 0.45797  | -0.5971  | -0.64638 | -0.47247 | -0.33623 | -0.55653 | -0.76811 | -1.13623 | -1.54042 | 1.50145  | 1.565224 | 0.226089 | -1.24059 | -2.15073 |
| Benzene 3            | 2.228981 | 1.092754 | -0.71884 | -1.87247 | -1.57101 | -0.84058 | -2.21449 | -1.24057 | 2.356522 | -0.68405 | -0.56522 | -1.45797 | -1.44637 | -1.11594 | -1.86667 | -1.33334 | -2.69855 | -1.58261 | -1.40581 | -1.73333 | -0.90725 | -1.73494 | 0.910156 | 0.933334 | -1.68985 | -0.75363 | -0.34782 |
| Benzene 4            | 1.008698 | 0.072464 | -0.22608 | -0.46957 | -0.10725 | 0.173912 | -0.76813 | 0.446381 | 2.857971 | 0.026093 | -0.40289 | -1.68985 | 0.197113 | 0.269562 | -0.11015 | -0.33913 | 0.231888 | -0.64058 | -0.03767 | -0.3855  | -0.47536 | 0.110153 | 2.098541 | 1.707253 | -0.3797  | 0.208694 | -0.20869 |
| Benzene 5            | 1.649277 | 0.460869 | -0.98261 | -0.22609 | -0.62898 | -0.49566 | -0.76231 | 0.959412 | 1.353625 | 0.559433 | -0.55942 | -1       | 0.869568 | 1.689857 | 1.31884  | -0.46956 | -0.12463 | -0.51884 | 0.568115 | -0.4087  | -1.4029  | 0.634781 | 1.939133 | 2.202896 | -0.25798 | 0.721725 | 0.315933 |
| Toluene 1            | 0.669563 | -0.8058  | -1.42899 | 1.544937 | 1.026093 | -0.49855 | -0.44348 | -0.36812 | 7.052185 | 0.237686 | -1.0116  | -1.08986 | 0.324646 | 0.959423 | 0.002897 | -0.42029 | -1.16812 | 0.002899 | -0.64058 | -0.27536 | -0.01159 | -0.97971 | 5.336227 | 1.440578 | -0.6145  | -1.53044 | 0.597092 |
| Toluene 2            | 1.402901 | 0.243478 | 0.605797 | 2.553619 | 0.663773 | -0.48116 | -0.48987 | -0.04639 | 4.594208 | 0.730438 | 0.008698 | -0.43189 | 0.234787 | 0.237686 | 0.124638 | 0.484055 | -0.67825 | 0.385508 | 0.101456 | -0.2029  | -0.21449 | 0.817398 | 3.913048 | 1.336235 | -0.54202 | 0.043488 | -0.52464 |
| Toluene 3            | 0.327538 | -0.17681 | -0.72754 | 1.220291 | 0.257965 | -0.21739 | -0.31595 | 0.559418 | 3.930435 | 0.736816 | 0.475372 | -0.45217 | 1.104355 | 0.197098 | 0.484058 | 0.927536 | 0.173904 | -0.95652 | 0.75943  | -0.13913 | 0.533334 | 0.46376  | 3.382614 | 2.698555 | -0.32173 | -0.14203 | -0.29855 |
| Toluene 4            | 0.646378 | -0.76812 | -1.47537 | 0.910141 | 0.028992 | -1.56812 | -0.59419 | 0.89856  | 4.037674 | 0.098557 | -0.35362 | -0.74783 | -0.2029  | 0.05217  | -0.33044 | 0.428986 | -0.25507 | 0.153624 | 0.226089 | 0.046379 | 0.814493 | -0.64638 | 2.510147 | -0.15072 | -0.84927 | -0.22029 | -2.06667 |
| Toluene 5            | 3.599998 | 2.37971  | 2.414497 | 2.556519 | 0.631882 | -0.41449 | -0.31303 | 0.115952 | 4.808701 | 0.553619 | -0.27536 | -0.90145 | 0.49855  | -0.04928 | -0.03189 | 0.686951 | -0.48985 | 0.315942 | -0.21159 | -0.0174  | 0.214493 | 0.753632 | 3.921738 | 1.460873 | -0.62608 | -0.02319 | -0.60001 |
| HCHO 1               | 0.008698 | -0.17391 | 0.382607 | 12.49565 | 3.255081 | -3.49276 | 1.011597 | -0.1913  | -0.24057 | 0.600006 | -0.50145 | -0.13913 | 0.26088  | -0.10435 | -0.84348 | 0.443481 | -1.47246 | -0.62029 | 0.394196 | 0.09565  | -0.42029 | 0.391312 | -0.65507 | -0.50435 | 0.788406 | 0.220291 | -1.06667 |
| HCHO 2               | -0.23478 | -0.10725 | 0.046379 | 11.73044 | 3.32753  | -3.8087  | 0.153625 | -0.48116 | 2.13913  | 0.74202  | 0.269577 | 0.313042 | -0.1913  | -0.28406 | 0.286957 | 0.518845 | -0.08696 | -0.08116 | 0.307236 | -0.31594 | -0.49565 | 0.046387 | -0.44928 | -0.04348 | 0.344925 | -0.3971  | 0.382614 |
| HCHO 3               | -0.58261 | 0.034782 | -0.50145 | 14.55652 | 4.582611 | -4.22319 | 0.46376  | -0.3855  | 2.275368 | 0.257965 | 0.608688 | -0.17391 | -0.19711 | -0.53043 | -0.74203 | 0.321747 | -0.55652 | 0.397101 | -0.9913  | -0.45218 | -0.89565 | -0.30725 | -1.98261 | -1.94493 | 0.828995 | 0.802902 | 0.475357 |
| HCHO 4               | 0.03479  | -0.0116  | 0.211594 | 11.26086 | 3.113037 | -2.43768 | 0.257965 | -0.35072 | 1.446381 | -0.21159 | -0.33043 | 0.927536 | 0.53624  | -0.4203  | 0.205795 | 0.060883 | 0.089859 | -1.17391 | -0.11885 | -0.78261 | 0.478261 | 0.098541 | -0.8     | 0.394203 | 0.736221 | -0.47536 | -0.06087 |
| HCHO 5               | 0.055073 | -0.42319 | 0.802902 | 11.06667 | 3.368118 | -2.5971  | 0.968109 | -0.0058  | 1.695648 | 0.626083 | 0.562317 | -0.8     | 0.455078 | 0.110146 | -0.95072 | 0.889847 | -0.15363 | 0.084058 | 0.017395 | -0.0029  | 0.472464 | -0.36232 | -0.6087  | -0.31594 | 0.800003 | -0.07826 | -0.02898 |
| 1,1,1 Tchlroethane 1 | 2.11594  | 0.310144 | -1.22898 | -0.15073 | 0.73912  | -0.53623 | 0.96521  | 0.86087  | 3.22319  | 0.788406 | 0.907257 | -0.36522 | 0.266663 | 0.794197 | 0.162317 | 0.547836 | 0.365219 | -0.08696 | 0.252182 | 0.388405 | -0.10725 | 0.747818 | 5.437688 | 1.214493 | 0.376801 | -0.6232  | -1.08986 |
| 1,1,1 Tchlroethane 2 | 1.353622 | 0.101449 | -0.5826  | -1.40581 | -0.92754 | -0.06667 | -0.04927 | 0.605789 | 1.678253 | -0.90724 | 0.330444 | -0.11305 | -0.46666 | 0.176811 | 0.49855  | -0.75362 | -0.90144 | 0.182609 | -0.67247 | 0.156525 | -0.06087 | 0.843475 | 5.295654 | 2.469563 | -0.88985 | -0.72173 | -0.62029 |
| 1,1,1 Tchlroethane 3 | 3.153625 | 2.747826 | 0.428986 | -1.28986 | -0.72174 | 0.02319  | -0.37392 | 0.023193 | 3.852173 | 0.388397 | 0.104355 | -1.04638 | 0.08696  | 0.95652  | 0.011597 | 0.226089 | -0.05798 | -0.09855 | -1.45218 | -2.68696 | -4.27826 | -0.77391 | 4.34494  | 0.759418 | -0.42319 | -0.15941 | -1.34493 |
| 1,1,1 Tchlroethane 4 | 2.127537 | 0.208696 | -0.8116  | 0.014496 | -0.24348 | -0.4     | 0.434784 | -0.28116 | 3.231888 | -0.12463 | -1.0087  | 0.257969 | 0.005783 | 0.092751 | -0.52464 | 0.002899 | 0.70726  | -0.62899 | 0.730438 | -0.78551 | -0.38551 | 0.342026 | 5.1884   | 1.391304 | 0.614502 | -0.0058  | 0.165222 |
| 1,1,1 Tchlroethane 5 | 1.930435 | 0.408695 | 0.037682 | -1.12753 | 0.226074 | -0.76522 | -0.17102 | 0.86377  | 3.800003 | 0.727524 | -0.28696 | 0.620289 | 0.057968 | 0.342026 | -0.36232 | -0.83479 | 1.066666 | -0.63188 | -0.48985 | 1.272461 | -0.4029  | -0.14783 | 5.376801 | 2.011597 | -0.60869 | 0.127548 | 0.101456 |
| p-Xylene 1           | 0.023193 | -0.73043 | -1.2058  | 0.753616 | -0.59421 | -1.02319 | -2.04057 | -1.46086 | 1.884048 | -2.36812 | -1.8145  | -0.88696 | -1.6348  | -0.66956 | -0.37101 | -1.79131 | -1.77681 | -1.04928 | -0.90434 | 0.35363  | 0.034782 | -1.65797 | 0.034775 | 1.747833 | -2.44348 | -2.17392 | -1.50435 |
| p-Xylene 2           | 1.579712 | 0.484058 | -0.18551 | 3.805786 | 0.611603 | -1.57971 | -4.68407 | -4.36522 | -2.94493 | -0.46957 | -0.33334 | -0.2     | -0.49855 | -0.27536 | -0.94203 | -0.30725 | -0.51015 | -0.33333 | 0.089859 | 0.01738  | -1.03188 | -0.13045 | 0.994202 | 1.17971  | -0.68697 | -0.04637 | -0.70145 |
| p-Xylene 3           | 0.620293 | 0.147827 | 0.281158 | 3.298553 | 0.8116   | -1.23188 | -0.73624 | 0.63768  | 5.582611 | -0.56812 | 0.066666 | -0.70145 | 0.011597 | -0.25217 | -0.50435 | 0.50145  | -0.50725 | 0.55942  | -0.29855 | 0.373917 | 0.284058 | -0.26088 | 1.533325 | 0.069565 | -0.31595 | 0.124634 | -0.55362 |
| p-Xylene 4           | 1.075363 | -0.15942 | 0.075356 | 5.217392 | 1.562317 | -0.70435 | 0.075363 | 0.701447 | 4.507248 | 0.373901 | 0.301453 | -0.24058 | 0.202896 | 0.231888 | -0.11305 | 0.484055 | -0.73914 | 0.156522 | -1.05219 | -1.22899 | -0.25797 | 0.333344 | 1.371017 | 2.130432 | 0.211594 | 0.055069 | -0.35652 |
| p-Xylene 5           | 0.707245 | -0.17102 | -1.15653 | 3.014496 | 1.817398 | -0.28986 | 0.026093 | -0.24928 | 2.081161 | 0.576813 | -0.76231 | 1.547829 | 0.321732 | 1.379707 | -0.07246 | 0.457977 | 0.246368 | -0.06377 | -0.65218 | -0.23479 | -0.66957 | 0.05217  | 1.281158 | 1.060867 | -0.08986 | -0.42029 | -0.8087  |
| p-dichlorobenzene T1 | 0.686958 | 0.768116 | -0.00869 | 3.057968 | -0.63478 | -2.10145 | 0.333344 | -0.9971  | -1.63188 | -0.67535 | 0.13913  | -1.34493 | 0.095642 | 0.142029 | 0.095652 | 0.298538 | -1.44638 | 0.411594 | 0.979706 | -0.91014 | -1.53623 | 0.168121 | -0.81739 | -0.10725 | 0.492752 | -1.13333 | -0.91304 |
| p-dichlorobenzene T2 | -0.26956 | 0.785507 | -0.10435 | 1.944931 | 0.286957 | -0.80869 | -0.90724 | -0.32755 | -1.65218 | -0.60001 | -0.8261  | 0.400002 | -0.07536 | 0.124638 | 0.182609 | -1.21739 | -2.21449 | -0.22609 | -0.09856 | -0.31304 | -1.08406 | -1.43477 | -0.12174 | -0.42029 | -0.73334 | -1.08696 | -0.68697 |
| p-dichlorobenzene T3 | 0.617393 | 0.631884 | -0.08116 | 1.295654 | 0.055084 | -1.97971 | -0.76521 | 0.469559 | -1.0087  | -0.86377 | -0.62029 | -1.9942  | -0.04057 | -0.02029 | -0.1913  | -0.90724 | -0.90146 | -1.4058  | -0.37682 | -0.49275 | -1.55362 | -0.31595 | 0.110146 | 0.617392 | -0.50725 | -0.66087 | -0.39711 |
| p-dichlorobenzene T4 | 0.303434 | 0.75942  | -0.32174 | -0.59131 | -0.40869 | -0.61739 | -0.25797 | -0.24347 | 1.110138 | -0.58261 | -1.03478 | -1.38551 | 0.055069 | 0.092754 | 0.171014 | -0.39421 | -1.28986 | -1.77391 | -1.02318 | -0.37391 | -2.00869 | -0.10434 | -0.12174 | 0.49855  | -1.05797 | -0.42319 | -0.47246 |
| p-dichlorobenzene T5 | 1.649277 | 0.942028 | -0.12754 | -1.64928 | -1.24928 | -0.46087 | -0.88985 | 0.399994 | -0.25797 | -0.26086 | -1.13913 | -1.13623 | -0.59421 | -0.02609 | 0.365217 | -0.58841 | -1.26666 | -1.95363 | 0.368118 | -1.15942 | -1.83768 | -0.75653 | -0.68696 | 0.779711 | -0.50435 | -0.84638 | -0.1971  |
| Limonene T1          | 0.04348  | 0.779711 | 0.226089 | -0.25218 | -0.16521 | -0.06667 | -1.11884 | 0.86087  | 0.797104 | -0.48406 | -0.78551 | -0.46377 | 0.063782 | 0.246377 | -0.03188 | 0.197098 | 0.63768  | -1.02609 | -0.31885 | -0.31015 | 0.640579 | -0.31883 | 0.18261  | 0.736233 | -0.60291 | -0.22897 | 1.50145  |
| Limonene T2          | 0.257973 | 0.649275 | 0.576813 | -0.1971  | -0.9855  | -0.36522 | -0.51305 | 0.072464 | 0.886963 | -0.33913 | 0.313034 | -1.78551 | -0.36522 | 0.095652 | -0.35073 | 0.846375 | 0.002899 | -1.32464 | -0.59131 | -1.2058  | -0.21739 | 0.026085 | -0.04058 | -0.19711 | -0.56233 | 0.544937 |          |
| Limonene T3          | 0.86956  | 0.582609 | -0.55363 | -0.24637 | 0.426102 | -0.12174 | 0.046371 | -0.04057 | 1.173904 | -0.31015 | -0.68115 | -0.87537 | -0.07536 | -0.04638 | -0.10725 | 0.721741 | -1.04639 | -0.87826 | 0.440582 | -0.35362 | -0.97681 | -0.15942 | 0.602898 | -0.21449 | -0.46086 | -0.32755 | -0.11594 |
| Limonene T4          | 0.18261  | 0.623188 | 0.121742 | -0.82898 | -0.29855 | -0.26377 | 0.002899 | 0.081161 | 0.997101 | 0.002899 | 1.507248 | -1.2058  | 0.443481 | 0.295652 | -0.12464 | -0.50435 | -1.06087 | -1.89565 | -0.28406 | 0.008698 | -0.10725 | -0.28986 | 0.556519 | 0.463768 | 1.026077 | -0.07536 | -0.79419 |
| Limonene T5          | 0.371017 | 0.655073 | -0.2116  | -0.3797  | 0.08696  | 0.205795 | -0.08116 | 0.046371 | -0.27536 | -0.47246 | 0.342026 | -1.4058  | -0.48695 | -0.14783 | -0.46667 | -0.26376 | -1.55074 | -1.04927 | -0.8029  | -0.04057 | -0.35942 | 0.318848 | 0.313042 |          |          |          |          |

|                      | R28      | G28      | B28      | R29      | G29      | B29      | R30      | G30      | B30      | R31      | G31      | B31      | R32      | G32      | B32      | R33      | G33      | B33      | R34      | G34      | B34      | R35      | G35      | B35      | R36      | G36      | B36      |
|----------------------|----------|----------|----------|----------|----------|----------|----------|----------|----------|----------|----------|----------|----------|----------|----------|----------|----------|----------|----------|----------|----------|----------|----------|----------|----------|----------|----------|
| Benzene 1            | 0.08696  | -0.48116 | -0.0145  | -0.03479 | 0.397102 | -1.74783 | 0.576813 | -0.8261  | -0.82028 | -0.65216 | 0.156525 | 0.571014 | -0.02028 | -0.59421 | 0.069565 | 1.124634 | -0.33043 | 0        | -0.8029  | -0.66666 | -0.66667 | 0.17971  | 0.62029  | -1.27536 | -0.11884 | 0.33913  | -0.32754 |
| Benzene 2            | 0.217392 | 0.011593 | 0.744926 | 0.576797 | -0.47247 | -1.59709 | -0.26666 | -1.16232 | 0.063766 | -0.35652 | -1.59311 | -1.35072 | -0.55072 | -0.35362 | -0.84638 | 1.324631 | -0.25217 | -0.4     | -0.58841 | -0.59999 | -0.26667 | 0.069565 | -0.07536 | -0.91884 | 0.249275 | -0.11594 | -0.41159 |
| Benzene 3            | -0.97102 | -0.85218 | -0.66087 | -0.40579 | -0.24638 | -2.82028 | -0.75363 | -1.64928 | -3.47827 | -0.66957 | -2.32463 | -0.97102 | -1.43189 | -1.11885 | -1.41159 | -0.86087 | -0.97681 | 0        | -1.20001 | -0.94492 | -0.1971  | 0.133333 | 0.078261 | -0.24928 | -0.62609 | -0.89275 | -0.88696 |
| Benzene 4            | 0.327538 | -0.15942 | -0.13333 | 0.837677 | 0.27536  | -0.18842 | -0.09276 | -0.12753 | -0.17392 | -0.3797  | 0.527542 | 1.113037 | -0.1768  | -0.23479 | 0.72464  | 0.51593  | -0.97971 | -0.1913  | -0.84638 | -0.09856 | -0.02029 | -0.2     | 0.124638 | -0.13623 | 0.194203 | 0.188404 | -0.16811 |
| Benzene 5            | 1.414497 | 1.54203  | 0.368114 | -0.08696 | 0.121735 | 0.350723 | 0.08696  | 0.449265 | -1.06377 | 0.962311 | 0.614502 | -0.33913 | 0.881165 | 0.281158 | 0.324646 | 1.156509 | 0.197098 | 0        | -0.43478 | 0.368118 | 2.823188 | 0.342029 | 0.434782 | -0.38261 | -0.04928 | 0.208698 | -0.15362 |
| Toluene 1            | -0.06667 | -0.33044 | -0.53623 | -0.40871 | -0.08116 | -1.26378 | -0.10436 | -0.46956 | 0.257965 | -0.8174  | -0.11884 | 0.768112 | -0.65507 | -0.1826  | 0.27536  | 1.199997 | -2.46378 | 0        | -0.94783 | 0.023178 | -0.06377 | 0.237681 | 0.182609 | -2.26377 | 2.136232 | 2.06377  | -1.38261 |
| Toluene 2            | 0.165218 | 0.289856 | 0.089855 | 0.449265 | -0.03188 | 0.318835 | 0.08696  | -0.32463 | -1.33333 | 0.959412 | 0.823181 | 1.118835 | 0.910141 | 0.408707 | 1.026093 | 1.211594 | -1.82898 | 0        | -0.28406 | 0.153625 | -0.14783 | 0.110145 | 0.121739 | -0.01739 | 0.814493 | 0.559422 | -2.45217 |
| Toluene 3            | 0.675362 | 0.884056 | -0.63768 | 0.933334 | 0.101456 | -0.09276 | 0.965225 | 0.234772 | -1.84348 | 0.698563 | 0.704361 | -0.84058 | -0.03767 | -0.21449 | 1.101456 | 0.678268 | -0.61159 | 0        | 0.113037 | 1.811584 | 3.811594 | 0.04058  | 0.075362 | -1.68116 | 0.710145 | 0.70435  | -2.23479 |
| Toluene 4            | -0.17102 | -0.27247 | -0.07536 | 0.179718 | -0.11594 | -1.18842 | 0.828995 | 0.489853 | -1.08986 | -0.67535 | -0.95363 | -1.27246 | -0.90726 | -0.14493 | -1.02029 | 0.049271 | -3.1971  | 0        | -0.31015 | -0.96233 | -0.49565 | 0.049275 | -0.16232 | -1.73334 | 0.623188 | 0.559422 | -2.5942  |
| Toluene 5            | -0.19131 | -0.16812 | -0.23478 | 0.452179 | -0.62029 | -0.11304 | 1.150726 | -0.32753 | -1.25508 | 0.950729 | 0.405792 | 1.150726 | 0.846375 | 0.292755 | 0.466675 | 1.565216 | -1.59711 | 0        | 0.057968 | 0.808685 | -0.15652 | 0.536232 | 0.489855 | -1.66087 | 0.849275 | 0.443478 | -2.48696 |
| HCHO 1               | 0.304348 | 0.005795 | 0.353622 | 0.252167 | 0.359421 | -0.76523 | 0.420288 | -1.42609 | 0.565216 | -0.90436 | -1.41739 | -1.07246 | 0.246376 | -0.97681 | -0.1768  | 2.634781 | -19.9333 | 0.17971  | -0.03189 | -0.47246 | 0.133333 | 0.802898 | 0.576813 | -2.45217 | 0.130432 | -0.82609 | -1.18261 |
| HCHO 2               | 0.269566 | -0.16812 | 0.698551 | -0.31593 | -0.25217 | 0.400009 | -0.1971  | -0.02319 | -0.53044 | -0.01738 | -0.37392 | 0.814499 | 0.020287 | -0.3768  | 0.075363 | 2.472473 | -18.6145 | 0        | 0.521744 | -0.04637 | -0.62319 | 0.65797  | 0.698551 | -0.08115 | 1.147827 | 0.921738 | -1.08406 |
| HCHO 3               | -0.26957 | -0.22609 | -0.12754 | -0.31593 | -0.06957 | -0.56233 | 0.156525 | 0.556519 | 0.571014 | -0.14783 | -0.26956 | -0.84058 | 0.600006 | 0.281158 | 1.597107 | 1.333344 | -22.5507 | 0.13913  | -0.59421 | 0.918839 | -0.12464 | 1.434784 | 1.06377  | -2.12174 | 1.086956 | 0.611595 | -0.45797 |
| HCHO 4               | -0.06957 | -0.21159 | 0.226089 | -0.3971  | -0.29855 | 0.307251 | -0.15073 | -0.36232 | 0.069565 | 0.220291 | -1.33913 | -0.28117 | 0.168121 | -0.27246 | 0.588409 | 1.86377  | -17.1131 | 0        | -0.56233 | -0.88986 | -1       | 1.127537 | 0.68116  | -1.19421 | 0.078262 | -0.46377 | -0.86957 |
| HCHO 5               | -0.21739 | -0.24928 | 0.65797  | 0.214493 | 0.376812 | -0.34203 | 0.455063 | -0.12755 | -0.91014 | -0.58841 | -0.26668 | 1.315933 | -0.36232 | -0.10434 | 0.092743 | 3.976807 | -21.4522 | 0.536232 | -0.75072 | 0.197098 | 0.585507 | 0.739132 | 0.692753 | -2.29276 | 1.814495 | 1.205795 | -0.45716 |
| 1,1,1 Tchlroethane 1 | -0.10145 | -0.02898 | -0.95073 | 0.684052 | 0.736229 | -0.69565 | 1.411591 | -0.12463 | 0.289856 | 0.646378 | 0.597107 | 0.084061 | 0.492752 | 1.081161 | -0.05507 | 1.843475 | -0.59131 | 0        | 0.582611 | 1.234772 | -0.28116 | 0.197102 | 0.127536 | -0.26957 | 0.342029 | -0.37681 | -0.75073 |
| 1,1,1 Tchlroethane 2 | -0.36232 | -0.02898 | 0.078262 | -0.03767 | -0.38261 | -1.10146 | -0.42609 | -0.51305 | -0.12174 | -0.43478 | -0.77101 | -0.629   | -0.0029  | 0.075363 | 0.782608 | 0.081161 | -0.42899 | 0        | -1.31015 | -0.08406 | 0.495651 | -0.36812 | 0.162319 | 0.663765 | -0.33044 | 0.327538 | 0.020287 |
| 1,1,1 Tchlroethane 3 | 1.168118 | 0.837681 | -0.49565 | -0.05217 | 1.411591 | -0.71884 | 0.307251 | -1.23189 | -0.1855  | -2.31014 | -1.25218 | -1.38551 | 0.084061 | 0.684052 | -0.3681  | -0.03479 | -1.36232 | 0        | -1.27826 | 0.014481 | -1.85507 | -0.02899 | 0.098551 | 0.107246 | 0.168116 | -0.29275 | -0.71884 |
| 1,1,1 Tchlroethane 4 | -0.25217 | 0.002895 | -0.48116 | 0.376801 | -0.47537 | -0.42319 | -0.28406 | -0.44927 | 0.765213 | 0.959427 | -0.61159 | 0.014496 | -0.30724 | -0.02899 | -0.41451 | 1.130432 | -1.13333 | 0        | -0.74202 | -0.56233 | 1.582609 | 0.063768 | -0.3942  | -0.34493 | -0.0087  | 0.011593 | -0.58551 |
| 1,1,1 Tchlroethane 5 | 0.950722 | 0.533333 | -0.24928 | 0.762314 | 0.168114 | 0.199997 | -0.55072 | 1.005798 | -0.01158 | 0.463776 | 1.707245 | 1.50145  | -0.24928 | 1.420288 | 0.10144  | 0.547821 | -0.46088 | 0        | 0.686951 | 0.040573 | -0.15942 | -0.2058  | 0.162319 | 0.27536  | -0.31015 | -0.1884  | -0.29276 |
| p-Xylene 1           | -0.67826 | -0.41159 | -1.0087  | -1.74202 | -0.09855 | -3.60289 | -2.29276 | -1.44928 | -1.23187 | -1.23477 | -1.09566 | -1.52464 | -0.05217 | -0.59131 | 0        | -1.31015 | -3.11304 | 0        | -2.26086 | -0.60291 | 0.098551 | 0.008696 | 0.30145  | -3.83189 | 0.481159 | 0.03438  | -5.11594 |
| p-Xylene 2           | 0.486954 | 0.698551 | 0.5942   | 0.417404 | 0.263771 | -0.8087  | -0.91594 | -0.71014 | -2.15073 | 0.408691 | 0.626083 | 0.41449  | 0.266663 | -0.31883 | -0.15363 | 1.365219 | -2.11884 | 0        | -0.35942 | -0.06377 | 0.223188 | -0.01449 | 0.443479 | -2.2     | 1.266666 | 0.828983 | -1.30145 |
| p-Xylene 3           | 0.113045 | -0.15942 | -0.09855 | 0.449265 | 0.142029 | 0.631882 | 0.272461 | -0.59709 | -0.53334 | -0.19132 | 0.202896 | 0.96521  | -0.629   | -0.35362 | -0.75942 | 1.269562 | -3.23189 | 0        | 0.423187 | 0.081161 | -0.6087  | 0.04058  | -0.06087 | -2.4     | 1.153624 | 1.414494 | -3.0116  |
| p-Xylene 4           | 0.263771 | -0.28116 | -0.23188 | 0.930435 | 0.310143 | -0.32175 | 0.626093 | 0.043472 | -0.06957 | -1.40001 | 0.205811 | 1.678253 | 2.017395 | 1.889862 | 2.11038  | -2.8058  | 0.026087 | 0.805786 | -0.15653 | 0.4      | 0.585507 | 0.055073 | -2.65797 | 1.449276 | 1.028988 | -2.55072 |          |
| p-Xylene 5           | -0.04058 | -0.25217 | 0.194202 | 0.107246 | 0.472466 | -1.52464 | 0.443481 | 0.492752 | 0.104355 | -0.65508 | -0.13623 | -1.34203 | 0.13913  | -0.45216 | -1.06957 | 0.927536 | -2.74782 | 0        | -0.54784 | -1.11594 | 0.246377 | 0.408696 | 0.15942  | -2.08986 | 0.991304 | 1.060871 | -2.10435 |
| p-dichlorobenzene T1 | -0.53913 | -0.17971 | -0.88985 | -0.49275 | 0.185509 | -1.22609 | -1.29855 | -0.83478 | -0.66086 | 0.231888 | -4.62318 | -6.38551 | -0.88117 | -0.95363 | -1.51015 | 4.771011 | 1.046387 | -0.88986 | -0.82898 | 0.202896 | 0.165217 | 0.440578 | -2.09565 | -13.7623 | 1.315941 | -2.06088 | -7.92463 |
| p-dichlorobenzene T2 | -0.44348 | -0.82899 | -0.88695 | -1.53043 | 0.023193 | -0.70145 | -0.94493 | -1.50435 | -0.1971  | -0.9884  | -4.90146 | -5.07826 | -2.13913 | -0.86087 | -2.07536 | 2.971024 | -2.46666 | -0.13623 | -2.12463 | -1.06667 | 0.463768 | 1.559422 | -1.64058 | -15.084  | 1.579708 | -2.8058  | -12.1246 |
| p-dichlorobenzene T3 | -0.58841 | -0.51594 | -1.14493 | -0.27246 | 0.002899 | 0.13913  | -0.22899 | 0.240585 | 0.234787 | -1.31015 | -3.94493 | -4.29276 | -1.64638 | -0.47537 | -0.87537 | 3.098557 | 0.86377  | -0.04348 | -1.3855  | -0.6058  | 0.165217 | 0.313046 | -3.37392 | -15.8841 | 0.828983 | -1.87826 | -9.87825 |
| p-dichlorobenzene T4 | -0.61159 | -0.44058 | -0.0087  | -0.64636 | 0.23188  | 0.095657 | -0.13913 | -0.30725 | -0.43189 | -1.70725 | -5.64638 | -5.54202 | -1.79421 | -1.71594 | -2.12463 | 3.440582 | 2.162323 | -1.28696 | -1.79131 | 0.257965 | 0.211594 | -0.51015 | -2.10146 | -11.6232 | -0.30725 | -3.18261 | -9       |
| p-dichlorobenzene T5 | -0.58841 | -0.70435 | -0.70435 | 0.101456 | -0.81159 | -1.47536 | -0.92174 | -0.36812 | 0.185516 | -0.22899 | -4.48406 | -3.20581 | -0.7971  | -1.03767 | -1.08115 | 4.27536  | 0.886963 | -1.46667 | -1.71593 | -0.98262 | 0.686956 | -0.35072 | -3.59131 | -12.9217 | -0.89855 | -2.77971 | -7.29275 |
| Limonene T1          | -0.44058 | -0.30435 | -0.33044 | 0.257965 | -0.16522 | 0.168121 | 0.10434  | 0.205795 | 0.333344 | 0        | 1.539139 | 1.727395 | -0.39131 | -0.38841 | -0.41161 | 3.39711  | 0.927536 | -0.02899 | -0.75362 | 0.336227 | 0.765217 | 0.055073 | -2.29855 | -11.8666 | 0.33913  | -3.2754  | -8.8029  |
| Limonene T2          | -0.9942  | -0.31884 | -0.44058 | 0.382614 | 0.307251 | -0.28826 | 0.797104 | 0.226074 | -1.9884  | 0.153625 | -1.0058  | -0.64058 | -0.21161 | -1.3855  | -1.14783 | 4.110153 | 1.568115 | 0        | -0.88405 | 0.437683 | -0.10445 | 0.414494 | -2.15942 | -16.0697 | 0.292755 | -2.95281 | -8.63479 |
| Limonene T3          | -0.05797 | -0.4058  | -0.53913 | 0.307251 | 0.118839 | -0.85797 | 0.269562 | -0.02609 | 0.347824 | 0.072464 | 0.831894 | 0.823196 | 0.046371 | 0.588409 | -0.05507 | 4.933334 | 0.973907 | 0        | -0.86377 | 0.049271 | 0.037681 | 0.133331 | -3.86086 | -18.8348 | 0.081158 | -2.96522 | -10.0667 |
| Limonene T4          | -0.38841 | 0.086956 | -0.62319 | 0.626083 | 0.417389 | -0.22609 | 0.179703 | 0.446381 | -1.50145 | 0.168121 | 0.797089 | -0.13913 | -0.12755 | -0.75363 | 0.930435 | 3.684067 | 1.707245 | 0        | -0.53333 | 1.307251 | -0.36522 | 0.15942  | -1.53912 | -12.4029 | 0.365219 | -1.21739 | -7.26086 |
| Limonene T5          | -0.55362 | 0.072464 | -0.92464 | 0.08696  | 0.463768 | -0.78841 | -0.60001 | -0.74202 | -1.74202 | -0.87245 | 0.156509 | -0.69855 | -0.0058  | 0.663773 | -0.36812 | 3.481155 | 1.017395 | 0        | 0.110153 | 0.437683 | 0.536232 | 0.327534 | -1.22609 | -10.3015 | -0.37101 | -0.09275 | -6.5942  |
| Camphene 1           | -2.26087 | -2.82899 | -3.15073 | 0.800003 | -0.08985 | -0.02029 | -0.28696 | 0.191299 | -0.36812 | -0.20    |          |          |          |          |          |          |          |          |          |          |          |          |          |          |          |          |          |

**Table S2.** Database for 20 VOCs at PEL and a control with pre-oxidation after five min exposure.

|                         | R1       | G1       | B1       | R2       | G2       | B2       | R3       | G3       | B3       | R4       | G4       | B4       | R5       | G5       | B5       | R6       | G6       | B6       | R7       | G7       | B7       | R8       | G8       | B8       | R9       | G9       | B9       |
|-------------------------|----------|----------|----------|----------|----------|----------|----------|----------|----------|----------|----------|----------|----------|----------|----------|----------|----------|----------|----------|----------|----------|----------|----------|----------|----------|----------|----------|
| Control 1               | -0.67827 | 0.124634 | 0.257971 | -0.07826 | -0.82608 | -1.46667 | -0.22029 | -0.31594 | -0.95363 | 0.156525 | 0.304344 | 0.066666 | -0.46376 | -0.55072 | -0.12754 | -0.26667 | 0.023186 | 0.547827 | 0.104348 | -0.27536 | 0.205795 | 0.44928  | 0.315933 | -0.41449 | 0.371017 | 0.086952 | -1.46088 |
| Control 2               | -0.2029  | 0.373917 | -0.10435 | 2.159409 | 3.617386 | 4.689857 | 2.05217  | 1.973915 | 2.50145  | 1.631882 | 0.550728 | 0.889854 | 1.657974 | 1.263771 | 1.652174 | 0.707245 | 1.794205 | 0.857971 | 0.101449 | 0.605797 | 0.394211 | -0.25508 | -1.13335 | -0.64638 | 1.101448 | 0.359421 | -1.16522 |
| Control 3               | 0.782608 | 0.478264 | 0.263768 | 0.110153 | 0.626083 | -0.56522 | 0.043488 | -1.08986 | 1.50145  | 0.339142 | 0.400002 | -0.43478 | -0.04347 | 0.489853 | -0.25507 | 0.252174 | -0.40508 | -0.46377 | -0.43189 | -0.48116 | -1.46376 | 0.156525 | 0.191299 | 0.614494 | 0.011597 | -0.36232 | 0.298553 |
| Control 4               | -0.22029 | -0.17682 | -0.4087  | -0.41159 | 0.101448 | -1.12464 | -0.18262 | -0.16522 | -1.71304 | 0.078262 | -0.30274 | -0.44348 | 0.110138 | -0.6029  | -0.58261 | -0.28116 | 0.014488 | -0.45797 | -0.04638 | -0.44348 | 0.249268 | 0.055084 | -0.90724 | -1.0145  | -0.52174 | -0.14203 | 0.168121 |
| Control 5               | -0.29276 | -0.4     | 0.269565 | 0.22319  | 0.014488 | -0.3971  | -0.12755 | -0.03478 | -0.9971  | 0.008698 | 0.292755 | -0.32464 | -0.43768 | -0.04348 | -0.23478 | 0.663765 | 0.301453 | -0.70145 | -0.41449 | -0.30725 | 1.379715 | -0.13913 | -0.57971 | -1.18551 | -0.85507 | -0.26376 | 0.898544 |
| HCHO T1                 | 0.342026 | 0.24058  | 0        | 0.640579 | 0.852173 | 1.130432 | 0.046387 | 0.507248 | 0.753624 | -0.30725 | 0.156517 | -0.02609 | 0.573914 | 0.556519 | -0.10435 | 0.321739 | 0.344925 | 0.521739 | -0.01739 | -0.63768 | -1.44928 | 0.660873 | -4.69565 | -2.03189 | 7.36232  | 4.857971 | -11.4058 |
| HCHO T2                 | -0.6116  | -0.24348 | 0        | 0.600006 | 1.263763 | 1.255074 | -0.22899 | -0.97102 | -2.12174 | 1.31015  | 0.35363  | 0.17971  | 0.373909 | -0.09566 | -0.31884 | -0.13043 | 0.246376 | 0.176812 | 0.063768 | -0.18261 | -1.28696 | 0.475372 | -4.41739 | -2.47246 | 7.423187 | 5.243481 | -11.313  |
| HCHO T3                 | -0.5826  | 0.02319  | 0.095652 | -0.33044 | 0.075363 | -0.02318 | -0.95363 | -0.03768 | -1.61159 | -0.69276 | -0.03478 | -0.30435 | 0.27536  | 0.072464 | -0.05797 | 0.605797 | -0.16232 | -0.10725 | -0.01159 | -0.44928 | -0.95653 | -0.13333 | -5.14783 | -2.31014 | 7.950722 | 4.968117 | -10.5246 |
| HCHO T4                 | -0.28116 | -0.27247 | -0.08116 | -0.52753 | -0.47536 | -0.68406 | -2.8029  | -2.04927 | -4.04057 | 0.142029 | -0.57681 | -0.75652 | -0.19711 | -0.26087 | -0.1942  | -2.04348 | -2.28696 | -2.0087  | 0.04058  | -0.29565 | -1.73044 | 1.017395 | -1.66087 | -1.24928 | 6.973911 | 4.385509 | -9.42609 |
| HCHO T5                 | 0.240585 | 0.852173 | 0.136232 | 0.220291 | 0.663773 | -1.0029  | -0.10436 | -0.22898 | -2.33913 | 0.504349 | -0.63768 | 0.124634 | -2.32753 | 0.18261  | 0.338405 | -0.25507 | -0.03478 | -0.02609 | -0.23478 | 0.243481 | -1.40579 | 1.571014 | -3.77681 | -0.62069 | 7.742027 | 5.031883 | -9.57391 |
| Benzene T1              | 1.226082 | -0.3971  | -0.57391 | -0.26088 | -0.54784 | -0.64058 | 0.023178 | -0.25507 | -0.95943 | 0.336243 | 0.246384 | -0.11594 | 0.336227 | -0.44347 | -1.76522 | 0.536232 | 0.573914 | 0.078261 | -0.21159 | 1.489853 | 0.307236 | -0.62029 | 1.843475 | 2.11594  | -3.16811 | -0.54783 | 2.304352 |
| Benzene T2              | 1.034782 | -0.74783 | -0.47826 | -1.13913 | 0.252167 | 0.324631 | -0.77103 | -0.5739  | -1.41739 | -0.94203 | -0.41739 | 0.846375 | -0.76521 | -0.36232 | 0.263763 | -0.02029 | -0.08986 | -0.33623 | -0.35073 | 1.098549 | 1.608688 | -0.72464 | 2.782608 | 3.81739  | -4.56232 | -0.86667 | 2.857971 |
| Benzene T3              | 0.350731 | -0.65508 | -0.13623 | 0.446381 | 0.008698 | -0.03479 | -0.15073 | -0.78839 | -1.56233 | 0.579712 | -0.64928 | -0.53912 | -0.22609 | -0.76232 | 0.400002 | 0.13044  | -0.51884 | -0.08116 | 0.814491 | -0.64928 | -0.73042 | 4.521744 | 2.286957 | -3.11305 | -0.50725 | 1.371017 |          |
| Benzene T4              | 1.150726 | 0.217392 | 0.573914 | -0.24347 | -1.6145  | 0.50145  | -0.1913  | -1.24058 | -2.13335 | 0.092758 | -0.06667 | -0.68406 | -0.21159 | -0.31014 | -0.44638 | -0.52174 | -0.72463 | 0.008696 | -0.10145 | 1.573914 | 0.756516 | -1.42029 | 1.44928  | 2.602898 | -2.73913 | -0.46957 | 0.199997 |
| Benzene T5              | 1.130432 | -0.38551 | 0.330435 | 0.39711  | 1.263779 | 2.457977 | -0.12174 | 1.028984 | -0.11014 | -0.51593 | -0.38551 | -0.40579 | 0.289856 | -0.43478 | -0.49565 | -0.73043 | -0.85508 | 0.008696 | -0.07246 | 1.547825 | 0.904358 | -0.77101 | 3.565216 | 2.652172 | -3.86087 | -0.66087 | 2.434784 |
| 1,1,1 Trichloroethane 1 | -0.11884 | 0.704346 | 0.426087 | -0.54204 | -0.26376 | -1.06957 | -0.75942 | 0.504349 | -1.80289 | -1.4174  | -1.13624 | -0.72463 | -1.56522 | -1.97681 | -2.53333 | -1.55073 | 0.185501 | 0.342029 | 0.057971 | -0.97971 | -0.19421 | 0.055069 | -1.92464 | -0.6087  | 3.49855  | -0.36812 | -3.89565 |
| 1,1,1 Trichloroethane 2 | -0.42899 | 0.568119 | -0.02319 | -0.62029 | -0.0029  | -0.02898 | -0.48695 | 0.034782 | -0.89854 | -0.25798 | -1.08116 | 0.037682 | 0.199997 | 0.098557 | 0.324638 | -0.25797 | -0.88116 | 0.098955 | 0.431884 | -0.29565 | 0.347824 | 0.405792 | -0.81448 | -1.7971  | 3.582611 | -0.42319 | -2.88117 |
| 1,1,1 Trichloroethane 3 | -0.12463 | 0.237686 | 0        | -0.35652 | 0.31884  | -1.29276 | 0.646378 | 1.168114 | 1.457977 | -0.78551 | 0.286957 | -0.11305 | 0.214493 | -0.04927 | 0.124638 | -0.12753 | -0.37102 | -0.73043 | 0.197101 | -0.4087  | -0.53622 | -0.02319 | -1.07826 | -0.91884 | 3.231884 | -0.93044 | -3.87247 |
| 1,1,1 Trichloroethane 4 | 0.278259 | 0.576813 | 0.011594 | 0.089859 | -0.06087 | -0.67535 | -0.07246 | 0.486954 | -1.50725 | -0.15653 | 0.081154 | 0.397102 | 0.22319  | -0.0058  | -0.74203 | -0.31304 | 0.133339 | 0.104348 | 0.324638 | -0.1971  | 0.884064 | 0.168121 | -0.51305 | -1.71014 | 4.379711 | -0.27826 | -4.08986 |
| 1,1,1 Trichloroethane 5 | -0.37392 | 0.037682 | 0.014493 | -1.14493 | -0.29565 | -0.17102 | -0.37392 | 0.034782 | 0.50145  | -0.69276 | -0.28986 | -0.02898 | 0.028992 | -0.24348 | 0.173916 | -0.31594 | 0.402901 | 0.65797  | -0.16232 | -0.97392 | 1.455078 | -0.44638 | -0.62898 | -2.08696 | 4.496551 | -0.08696 | -4.1971  |
| p-Xylene 1              | -0.29565 | -0.72174 | -0.05217 | -2.29276 | -1.6087  | -1.6     | -1.05507 | -0.5971  | -1.53913 | -1.81449 | -1.57971 | 0.336231 | -2.46377 | -1.4058  | -0.50724 | -1.96322 | -1.18261 | -0.11304 | 0.269565 | -2.86087 | -7.1913  | 4.110153 | -27.4174 | -11.0899 | 60.5493  | 40.2960  | -90.1971 |
| p-Xylene 2              | 1.217392 | 1.959419 | 2.214493 | -0.12753 | 0.240578 | 0.098551 | -0.29855 | 0.371014 | -0.63479 | -0.35652 | 1.750725 | 1.718838 | -0.11305 | 0.605797 | 0.686954 | 1.556519 | 0.739128 | 3.22319  | 0.715942 | -0.57101 | -7.73622 | 3.255066 | -14.2985 | -12.1652 | 51.58551 | 34.20869 | -84.5768 |
| p-Xylene 3              | -0.49565 | 0.782608 | 0.585507 | 0.339142 | 0.124649 | -0.64927 | 0.84639  | 0.495651 | -0.07246 | 0.417404 | -0.33913 | 0.330433 | -0.6116  | 0.133331 | 0.759418 | -0.33913 | 0.446381 | 0.263769 | 0.098551 | -1       | -6.48695 | 2.834778 | -18.5101 | -10.9536 | 53.86667 | 36.57101 | -89.0551 |
| p-Xylene 4              | -1.61449 | -0.87536 | 1.002899 | -2.48116 | -2.50725 | -1.43478 | -3.9913  | -3.35942 | -2.42029 | -4.23189 | -0.84638 | 1.626087 | -3.77681 | -0.55942 | 0.930435 | -1.24638 | 0.321739 | 1.802898 | 0.614492 | -1.37391 | -9.18262 | 0.066681 | -16.6116 | -12.4725 | 60.0116  | 42.15653 | -89.6145 |
| p-Xylene 5              | -0.89565 | -0.16811 | 0.736229 | -0.34782 | -0.63189 | -1.47826 | -1.45218 | -1.10435 | -0.10449 | -1.50145 | -0.87827 | 0.046379 | -1.68405 | -1.49275 | -1.26086 | -0.65797 | -0.70145 | 1.289856 | 0.011594 | -1.73623 | -6.97392 | 2.339142 | -15.6348 | -12.2435 | 52.82029 | 35.87536 | -88.7478 |
| o-Xylene 1              | -0.32175 | -1.55362 | -0.35362 | -0.91884 | -0.89275 | -1.52174 | -3.11305 | -0.49276 | -3.23478 | -3.38551 | -3.16522 | -2.50435 | -3.46957 | -2.21449 | -0.75652 | -2.06377 | -1.17971 | 0.10145  | 0.443478 | -2.11884 | -6.90434 | 3.979721 | -28.1971 | -11.4261 | 63.05797 | 44.12464 | -85.9884 |
| o-Xylene 2              | 0.402893 | 5.359421 | 12.87536 | -2.06667 | -1.35652 | -2.23189 | -3.86087 | -3.00579 | -5.30434 | -0.91594 | 3.521736 | 7.373917 | -1.26378 | -1.64348 | 0.255074 | 2.718842 | 3.892754 | 9.417389 | 0.127536 | -2.33333 | -8.66957 | 0.402897 | -27.913  | -11.3971 | 64.04347 | 45.05217 | -81.6667 |
| o-Xylene 3              | -0.38261 | -0.37391 | -0.34782 | -0.57681 | 0.069565 | -0.13623 | -0.13043 | 0.26667  | -0.37102 | -0.2058  | -0.27537 | -0.04928 | -0.67825 | 0.359421 | -0.17971 | -0.46087 | 0.411598 | 0.373913 | -0.15362 | -2.45218 | -7.9884  | 4.200012 | -31.7826 | -6.9942  | 63.77681 | 44.04927 | -86.5623 |
| o-Xylene 4              | 0.953621 | 3.698555 | 5.205797 | -0.57101 | -0.4058  | -0.89275 | -0.24059 | 0.292747 | 0.371017 | 0.527542 | 1.388405 | 2.150273 | 0.472473 | 2.672462 | 3.652172 | 1.133331 | 1.750725 | 1.724636 | 0.756217 | -1.9913  | -7.83768 | 3.539124 | -29.9826 | -10.4232 | 63.31304 | 45.11305 | -81.2319 |
| o-Xylene 5              | -0.31884 | 1.142029 | 1.953621 | -0.16812 | 0.208694 | 0.156525 | -1.04927 | -0.38841 | -1.46957 | -0.72753 | 0.373913 | 0.185505 | -1.16522 | 0.014496 | 0.947826 | -0.23768 | 0.884056 | 2.249275 | 0.301449 | -1.30725 | -4.55652 | 3.13913  | -28.9304 | -10.2348 | 62.65507 | 44.9971  | -77.4406 |
| m-Xylene 1              | -3.45218 | -3.06377 | -2.49855 | -0.44059 | -3.34782 | -5.11884 | -4.74782 | -4.06377 | -6.66087 | -4.21159 | -1.10725 | 1.028984 | -2.63478 | -2.22319 | -0.98551 | -0.17681 | 0.739128 | 3.437681 | 0.075362 | -2.18551 | -9.05217 | 4.1884   | -39.7942 | -1.77101 | 50.26666 | 29.38261 | -95.8754 |
| m-Xylene 2              | -1.11594 | -0.51885 | -1.11304 | -0.95653 | 0.165215 | -0.33623 | -0.85217 | 0.150726 | -1.44058 | -1.11015 | -0.04638 | 0.713044 | -0.71015 | -0.26957 | 0.060869 | -0.13913 | 0.217392 | 0.695652 | 0.631884 | -1.94493 | -10.4696 | 3.933334 | -35.9275 | -4.43478 | 49.15363 | 28.42609 | -91.6551 |
| m-Xylene 3              | -0.48696 | 0.460869 | 2.049276 | 0.733337 | -0.03188 | 0.315941 | -0.39421 | 0.031883 | 0.295639 | -0.47246 | -0.15072 | 0.915943 | -0.44928 | -0.04927 | -1.27247 | -1.06377 | -0.4145  | -0.4058  | 0.698551 | -1.95942 | -10.1594 | 5.77681  | -42.2783 | -8.21739 | 57.46087 | 34.31884 | -96.2667 |
| m-Xylene 4              | 0.144928 | 0.402899 | 0.211594 | 0.901451 | 0.614494 | -0.06957 | 1.727539 | 0.446377 | 0.002899 | 0.898552 | 1.214493 | 0.330435 | 1.078262 | 1.727535 | 0.246378 | 0.750725 | 0.736233 | -0.18551 | 1.243478 | -1.9971  | -12.6986 | 5.991302 | -39.5072 | -4.69565 | 57.3971  | 34.24928 | -93.458  |
| m-Xylene 5              | -2.32753 | -1.68116 | 1.055073 | 0.776825 | -0.12174 | 0.081154 | -0.32463 | 0.034782 | 0.295654 | -0.25218 | -0.17101 | 0.950722 | 0.118851 | 0.623184 | -0.53043 | -0.8     | -0.16811 | -0.13333 | 0.756522 | -2.04348 | -10.0174 | 5.834778 | -        |          |          |          |          |

|                         | R10      | G10      | B10      | R11      | G11      | B11      | R12      | G12      | B12      | R13      | G13      | B13      | R14      | G14      | B14      | R15      | G15      | B15      | R16      | G16      | B16      | R17      | G17      | B17      | R18      | G18      | B18      |
|-------------------------|----------|----------|----------|----------|----------|----------|----------|----------|----------|----------|----------|----------|----------|----------|----------|----------|----------|----------|----------|----------|----------|----------|----------|----------|----------|----------|----------|
| Control 1               | 0.26087  | -0.26667 | -0.74492 | 1.417389 | 0.124641 | -2       | -0.29855 | -0.88405 | -0.10725 | 0.455078 | -0.59999 | -0.54782 | 0.495651 | 0.208702 | -1.24347 | 0.594203 | 0.417397 | -1.55072 | 1.449276 | 0.55072  | -0.67827 | 0.211594 | -0.30144 | 0.136246 | -0.46668 | -0.46087 | 0.052177 |
| Control 2               | -0.01159 | -0.16522 | 0.066666 | 1.15942  | 0.736237 | -1.96231 | -0.14493 | -0.14203 | 0.426086 | -0.75362 | 0.026093 | -1.43768 | -0.39131 | -2.24638 | -2.72754 | 0.75942  | -0.22609 | -0.77103 | 0.202898 | 0.028984 | -0.18262 | 0.176819 | -2.90146 | -1.62318 | 0.488953 | 1.49855  | 0.652176 |
| Control 3               | 0.150725 | 0.846378 | -0.55652 | 0.257973 | 0.205803 | 0.217392 | -0.25507 | -0.08116 | -1.05797 | -1.05797 | -0.37972 | -0.02899 | 0.072464 | 1.07246  | -0.08696 | 0.092751 | -0.71884 | -0.08696 | 0.321739 | 0.13623  | -0.78551 | 0.005798 | 0.110138 | 0.582596 | -0.03188 | -0.82898 |          |
| Control 4               | 0.014493 | -0.10145 | -0.74783 | 0.988405 | -0.13913 | -1.74493 | -1.2029  | -0.55362 | -1.03478 | -0.36812 | -0.22899 | -0.58841 | -0.12174 | -0.19131 | -0.91594 | -0.10725 | -0.04058 | -0.25507 | 0.223186 | -0.22029 | -0.96812 | 0.463776 | -0.42899 | -2.41449 | -0.64348 | -0.02898 | -1.47536 |
| Control 5               | -0.0058  | 0.165218 | 0.942032 | 0.130434 | 0.388412 | -1.04637 | -0.74204 | 0.284058 | -0.37971 | -0.47537 | -0.71304 | 1.142029 | -0.05219 | 0.460869 | -0.2058  | -0.07246 | 0.176811 | 0.037689 | -0.41159 | -0.08115 | 0.510132 | -0.58261 | -0.1797  | -1.70145 | -0.22609 | 0.347824 | 0.13044  |
| HCHO T1                 | 0.944927 | 1.150723 | -5.82608 | 12.49275 | 5.968109 | -9.71884 | -0.50435 | -0.26668 | 0.336231 | 1.463776 | 1.086945 | -0.54203 | 2.284058 | 1.350723 | -0.8029  | 0.405797 | 0.069565 | -0.90724 | 0.423191 | -0.33334 | -1.76521 | -0.18262 | -0.14203 | 0.211594 | -0.2058  | -0.11015 |          |
| HCHO T2                 | 0.936232 | 1.797104 | -7.53914 | 13.29855 | 6.478256 | -7.9884  | 0.481171 | 0.205795 | 0.158841 | 0.646362 | 0.67247  | 0.336235 | 1.802902 | 1.930435 | 0.026087 | 0.228986 | 0.171013 | -0.54784 | 2.031883 | 0.44928  | -0.75362 | 0.153625 | -0.43189 | 0.153625 | 0.579712 | 0.249275 | -0.04058 |
| HCHO T3                 | 0.414493 | 1.113045 | -6.22319 | 11.62899 | 5.843483 | -9.49855 | 0.782608 | -0.32465 | -0.05507 | 0.886963 | 1.136246 | -0.08406 | 1.785507 | 2.518837 | -0.6116  | 0.547826 | -0.06667 | -1.72464 | 0.602898 | 0.10144  | -2.25507 | -0.74492 | -0.08986 | 0.779709 | -0.85217 | -1.8116  | -0.75652 |
| HCHO T4                 | 0.643478 | 1.455074 | -4.15363 | 11.72174 | 6.408707 | -8.33913 | 0.472473 | 0.452179 | -0.31304 | 1.710144 | 1.101456 | 0.278259 | 2.48407  | 2.968117 | -0.6029  | 0.171015 | 0.49276  | -0.97681 | 0.930431 | 0.956512 | -1.0174  | 0.084061 | 0.002899 | -0.17102 | 0.434769 | -0.19711 | 0.234783 |
| HCHO T5                 | -1.68116 | -0.69565 | -7.59421 | 14.42899 | 5.095642 | -7.72755 | -0.22029 | 0.304444 | 0        | 0.046371 | 0.8116   | -0.87826 | 1.991302 | 4.194199 | -0.33913 | 0.385508 | 0.226082 | -0.44058 | 0.814495 | 1.344925 | -0.36232 | 0.971008 | -0.6116  | -1.17392 | -0.10725 | -0.48985 | -0.32174 |
| Benzene T1              | 1.147826 | 0.237679 | 3.191315 | -5.70725 | -1.75652 | 0.420892 | -0.57101 | 0.646378 | 3        | -0.24347 | -0.61159 | -0.00579 | -1.35652 | -1.56232 | 2.611595 | 0.118841 | 0.304352 | -0.15653 | 0.672464 | 0.402901 | -0.8145  | 0.713043 | -0.69276 | -1.18262 | -0.64058 | -0.34783 | -0.47536 |
| Benzene T2              | 0.559421 | 0.144928 | 4.405792 | -6.8     | -1.76521 | 5.452164 | -1.43768 | -0.04637 | 1.74493  | -2.14783 | -1.07246 | 1.075363 | -2.52754 | -2.52754 | 3.127537 | -0.07536 | 0.208702 | -0.34493 | -0.72754 | -0.70435 | 1.962318 | -1.58841 | -2.24347 | -0.95363 | -1.31305 | -0.71884 | -0.66666 |
| Benzene T3              | 0.884059 | -0.04927 | 0.30479  | -6       | -1.59129 | 0.498557 | -0.94202 | 0.484055 | 1.994202 | -0.46957 | -0.59711 | 1.069572 | -2.55362 | -2.40869 | 2.42609  | -0.56232 | -0.0116  | -0.04057 | 0.263769 | -0.68116 | -0.86667 | -0.41159 | -0.47826 | -1.26088 | -1.55942 | 0.023186 | -0.91304 |
| Benzene T4              | 1.295652 | -0.31595 | 2.704346 | -5.1884  | -2.34493 | 3.968109 | -2.53912 | 0.081161 | 1.400002 | -0.37392 | -0.49855 | 1.971016 | -3.47246 | -3.06377 | 1.605797 | -0.09855 | -0.19421 | -1.53044 | -0.06667 | -0.64348 | -0.05797 | -1.46088 | -2.28406 | -4.2029  | -1.60289 | -0.55073 | 0.72464  |
| Benzene T5              | 0.846376 | 0.257973 | 4.930435 | -6.04058 | -1.44058 | 4.942032 | -0.50723 | 0.382599 | 2.576809 | 0.22319  | -0.31593 | 1.776817 | -1.92464 | -1.85508 | 2.121742 | -0.18841 | -0.11015 | 0.092758 | 0.092754 | -0.41159 | -0.31015 | 0.49855  | -1.59131 | 0.315933 | -0.24637 | -0.42609 | -0.02029 |
| 1,1,1 Trichloroethane 1 | -0.54783 | -0.01739 | -0.17102 | 3.434782 | -1.49275 | -5.42609 | -1.59421 | -1.02029 | -1.45218 | 0.069565 | 1.049271 | -1.06957 | 0.794205 | 2.689857 | -2.72754 | -0.22029 | -1.48406 | -2.94782 | 0.211594 | -1.89565 | -1.6116  | -0.66666 | -0.6116  | -0.17102 | -0.71884 | -0.64066 | -0.28986 |
| 1,1,1 Trichloroethane 2 | -0.32174 | -0.01739 | 0.942032 | 3.014492 | -1.31884 | -3.53043 | 0.301453 | -1.11594 | -1.30145 | 0.576813 | 0.547821 | -0.24638 | 1.318848 | 3.898552 | -2.05507 | -0.02899 | -1.16232 | -1.51885 | 0.310144 | -2.24347 | -0.73624 | 0.098557 | -1.26088 | -1.43767 | 0.518845 | -0.08116 | -0.14493 |
| 1,1,1 Trichloroethane 3 | -0.4058  | 0.469563 | 0.878265 | 3.469566 | -0.30435 | -3.31885 | 0.828995 | -1.26088 | -0.97391 | 0.605804 | 0.243484 | -1.17971 | 1.179703 | 3.553619 | -2.35362 | 0.602899 | -1.45798 | -1.28116 | 0.733332 | -1.10146 | -0.76521 | 0.260864 | 0.26088  | -0.43189 | 0.295654 | -0.11884 | -0.47246 |
| 1,1,1 Trichloroethane 4 | -0.2058  | 0.353622 | 1.286957 | 2.968117 | -0.8174  | -5.03769 | 0.924637 | 0.081146 | -1.32464 | 1.843475 | 0.91304  | -1.21159 | 1.710159 | 5.063766 | -2.65507 | 0.107246 | -1.45798 | -1.82318 | 0.652174 | -1.59711 | -1.28116 | 0.394196 | 0.197098 | -1.02029 | 0.611588 | -0.29855 | 0.533333 |
| 1,1,1 Trichloroethane 5 | 1.478261 | 2.147827 | 1.327545 | 3.857971 | -1.08406 | -0.08115 | 0.127533 | -0.63768 | -1.66666 | 1.478271 | 1.159424 | -1.06087 | 1.159424 | 4.81739  | -2.67826 | 0.136232 | -1.33334 | -2.11304 | 0.486956 | -0.10158 | -1.62029 | -0.58841 | -0.64926 | -0.62608 | -0.13043 | -0.17391 | -0.73623 |
| p-Xylene 1              | 0.585507 | 0.604378 | -37.4377 | 78.46667 | 35.25797 | -70.9652 | 3.13913  | 1.216449 | -0.13044 | 5.321732 | 5.582596 | -1.35362 | 19.91016 | 43.57101 | -4.32174 | 2.385507 | -2.13913 | -6.45218 | 3.869565 | -5.5971  | -6.68985 | -0.28406 | 0.492752 | -0.71014 | 0.768112 | 0.614502 | 0.530434 |
| p-Xylene 2              | 0.011594 | 4.614492 | -29.0145 | 72.29855 | 33.06377 | -62.9101 | 5.092743 | 2.924637 | -0.09855 | 5.991318 | 5.785507 | -1.50725 | 21.51015 | 43.35072 | -3.72464 | 1.515942 | -1.8116  | -3.04637 | 1.127536 | -4.41449 | -5.29565 | 0.660858 | 1.466675 | -0.60579 | 1.495651 | 0.31015  | 0.121742 |
| p-Xylene 3              | 0        | 4.956522 | -30.4899 | 78.44058 | 35.08115 | -69.0058 | 3.402893 | 2.243484 | 0.037682 | 3.475357 | 3.918889 | 0.324638 | 20.10436 | 42.1797  | -3.55653 | 2.130435 | -1.78261 | -5.91885 | 2.139131 | -4.92174 | -4.84348 | 0.211594 | -0.26086 | 1.602905 | 1.057968 | 1.339127 | 3.168114 |
| p-Xylene 4              | 2.211594 | 7.211596 | -34.7594 | 87.69565 | 38.6116  | -68.229  | 4.298553 | 2.86377  | -1.44058 | 6.991302 | 5.86087  | -0.47826 | 20.88406 | 40.9855  | -3.78841 | 1.684058 | -0.27536 | -5.94204 | 2.194203 | -4.22608 | -4.92174 | 0.579712 | 1.107254 | -1.6116  | 0.947815 | 0.055084 | 1.68114  |
| p-Xylene 5              | 0.002899 | 4.788408 | -31.6087 | 76.35362 | 35.54783 | -71.3855 | 2.991302 | 1.846375 | 0.257973 | 5.484055 | 5.744934 | -1.2     | 20.92464 | 42.55362 | -5.01739 | 1.837681 | -1.68696 | -5.70435 | 2.713044 | -4.89565 | -6.8     | 0.492752 | -0.3884  | -0.19132 | 0.153625 | -0.78261 | 1.217392 |
| o-Xylene 1              | 1.246377 | 10.48406 | -51.8957 | 89.96523 | 39.16522 | -68.8812 | 2.649277 | 0.910141 | -0.85507 | 4.553619 | 4.113052 | -0.56522 | 15.26666 | 30.88985 | -4.2     | 1.663768 | -2.53043 | -0.66667 | 3.150725 | -5.2058  | -7.44348 | 0.611588 | 0.611603 | -0.83479 | 0.910141 | -0.22609 | -0.10146 |
| o-Xylene 2              | 1.71884  | 11.11305 | -50.1913 | 91.85217 | 38.77682 | -67.2841 | 1.075363 | 1.515945 | -1.34493 | 3.950729 | 3.681516 | -0.15363 | 15.27862 | 29.9942  | -3.73791 | 1.689856 | -1.95942 | -6.08406 | 2.881159 | -5.39999 | -5.97101 | 0.368118 | -0.61159 | -0.24928 | -0.88405 | -0.51883 | -1.6145  |
| o-Xylene 3              | 0.408696 | 8.2029   | -46.4754 | 89.58261 | 40.62899 | -71.7652 | 3.460876 | 1.495651 | -0.77391 | 6.194199 | 4.872467 | -2.2058  | 16.45798 | 34.66087 | -4.2058  | 2.017391 | -1.87537 | -5.45218 | 3.365217 | -4.73043 | -7.35362 | 0.101456 | 0.704346 | -1.38261 | -0.14783 | -1.04927 | -0.92464 |
| o-Xylene 4              | 0.655072 | 7.72464  | -46.4029 | 92.12754 | 41.62956 | -67.7449 | 2.571014 | 1.675369 | -0.69855 | 3.973907 | 3.339142 | 0.481155 | 14.15653 | 29.04639 | -3.29565 | 1.568116 | -2.22609 | -6.31883 | 2.872463 | -4.54493 | -6.94203 | 0.144928 | 0.831879 | -1.36812 | 0.324631 | -0.86667 | -0.33913 |
| o-Xylene 5              | 0.44058  | 8.620289 | -48.2261 | 87.47537 | 38.62029 | -67.9942 | 2.379715 | 2.147827 | 0.162319 | 4.086945 | 4.41449  | -0.03768 | 15.95653 | 30.54492 | -3.08985 | 2.092752 | -1.84058 | -5.31303 | 2.886957 | -4.12174 | -7.16522 | 1.278259 | 0.005798 | 0.571014 | 0.153625 | 0.266663 | 0.582611 |
| m-Xylene 1              | 0.211594 | 6.846378 | -55.0667 | 79.5913  | 50.10435 | -92.6464 | 3.617386 | 1.744934 | -1.36522 | 7.684067 | 6.295654 | -4.47826 | 23.05217 | 47.63768 | -5.77391 | 1.472464 | -3.53334 | -13.0319 | 0.376812 | -9.42899 | -15.4029 | -0.30725 | 0.324646 | -2.92464 | -0.11885 | 0.73333  | -0.50724 |
| m-Xylene 2              | 0.226087 | 5.005796 | -44.6203 | 83.32174 | 45.84927 | -81.2927 | 4.559481 | 2.507248 | -0.76812 | 9.359421 | 7.452179 | -1.75652 | 20.29855 | 41.27826 | -4.4058  | 1.197102 | -3.42899 | -10.5623 | 0.434783 | -7.09856 | -10.7942 | 0.959427 | 0.228989 | -0.65797 | 1.475372 | 1.202896 | 0.979713 |
| m-Xylene 3              | 0.153623 | 6.408697 | -49.8957 | 88.67826 | 49.92464 | -88.8435 | 5.286957 | 2.55072  | -0.65507 | 10.44928 | 8.608688 | 0.121742 | 23.53624 | 46.77971 | -5.23768 | 2.104348 | -3.43768 | -12.0783 | 2.765217 | -6.22029 | -9.07826 | 1.028976 | 0.318848 | -1.26668 | 0.701462 | 1.09565  | 0.605797 |
| m-Xylene 4              | 0.266667 | 8.904348 | -56.3014 | 72.86087 | 47.50435 | -87.6956 | 4.698547 | 3.234787 | 1.069565 | 7.176804 | 6.199997 | -0.70725 | 20.93623 | 43.51885 | -3.74493 | 1.73913  | -3.04638 | -11.0812 | 0.313043 | -7.42609 | -11.0377 | 1.295654 | 1.150726 | 0.452179 | 1.231888 | 1.226089 | -0.23769 |
| m-Xylene 5              | 0.171014 | 6.12174  | -50.1362 | 90.02609 | 50.07537 | -89.5391 | 5.246384 | 2.608704 | -0.54203 | 10.58551 | 8.704346 | 0.095654 | 23.70435 | 47.16232 | -4.70435 | 2.092754 | -3.26377 | -11.7507 | 0.834782 | -8.24348 |          |          |          |          |          |          |          |

|                         | R19      | G19      | B19      | R20      | G20      | B20      | R21      | G21      | B21      | R22      | G22      | B22      | R23      | G23      | B23      | R24      | G24      | B24      | R25      | G25      | B25      | R26      | G26      | B26      | R27      | G27      | B27      |
|-------------------------|----------|----------|----------|----------|----------|----------|----------|----------|----------|----------|----------|----------|----------|----------|----------|----------|----------|----------|----------|----------|----------|----------|----------|----------|----------|----------|----------|
| Control 1               | -0.11305 | 0.107246 | -0.21449 | 0.953613 | 0.162323 | -0.48985 | -0.47537 | -0.52174 | 1.156525 | 0        | -0.40869 | 0.327538 | 0.452164 | 0.110145 | 0.42029  | -0.63478 | -1.05217 | -0.4029  | -0.30435 | -0.59419 | -0.75942 | 0.257965 | -0.29565 | 0.028986 | -0.42899 | -0.3942  | -1.16521 |
| Control 2               | 0.513042 | 0.266666 | -0.51304 | -0.0174  | -1.71014 | 1.515942 | -0.28696 | -0.02029 | 1.315948 | -0.48406 | -0.57681 | 1.046379 | -0.11594 | -0.0087  | -0.4     | -0.51015 | -0.74783 | 0.626087 | -0.59131 | 0.260872 | 0.130435 | 0.408707 | 0.081158 | 0.028986 | -0.53622 | -0.0029  | -0.56813 |
| Control 3               | 0.026089 | -0.03768 | 0.002899 | -0.21159 | -0.34782 | 0.579712 | -0.74783 | 0.739136 | -0.59709 | 0.063766 | 0.185501 | 0.347828 | 0.692749 | 0.075362 | 0.463768 | 0.017395 | 0.113037 | 0.066667 | -0.52174 | -0.61739 | 0.362319 | 0.110138 | -0.15073 | 0.066667 | -0.6145  | 1.05217  | -0.31595 |
| Control 4               | 0.04348  | -0.54493 | -0.24058 | 0.005798 | -0.06957 | -0.47246 | -0.22899 | -0.54202 | 0.255081 | -0.07246 | -0.28986 | -0.91884 | 0.539124 | -0.04348 | -0.41739 | -1.14783 | -0.44638 | -0.87536 | -0.0174  | 0.066666 | 0.249276 | -0.05507 | -0.02319 | -0.15652 | 0.313049 | 0.014496 | -0.71594 |
| Control 5               | -0.22319 | 0.21739  | 0.927536 | -0.02319 | -0.10144 | -0.30145 | 0.153625 | 0.356522 | 0.13623  | -1.0058  | -0.28117 | 0.750725 | 0.718842 | 0.24058  | 0.063768 | -0.50435 | 0.231888 | 0.130435 | 0.020294 | -0.14783 | -0.11594 | 0.043472 | 0.066666 | 0.02029  | 0.260864 | -0.09564 | -0.90434 |
| HCHO T1                 | 0.289856 | 0.098551 | 0.028984 | 0.721741 | -0.06957 | -0.07536 | -0.51593 | 0.579697 | 0.159424 | -1.04927 | -0.66087 | -0.88406 | -1.23479 | -1.72174 | -0.40579 | -0.37087 | -0.33623 | -0.52174 | -0.09566 | -0.66088 | -0.45797 | -0.08695 | -0.31884 | 0.223188 | -0.76521 | -0.40871 | 1.292755 |
| HCHO T2                 | -0.73624 | -0.07536 | 0.202904 | 0.666656 | -0.04347 | 0.365219 | -0.26666 | -0.37682 | -0.7971  | 0.455078 | -0.59419 | 0.263771 | -0.15653 | -0.0145  | 1.347824 | -0.12463 | -0.74204 | 0.695652 | -1.2058  | -0.05217 | 0.362319 | -0.51885 | 0.400002 | -0.07246 | -0.13043 | 0.043488 | 0.115936 |
| HCHO T3                 | -0.17392 | -0.11884 | 0.060867 | -0.19421 | -0.24637 | -0.65508 | 0        | -0.8232  | -0.34493 | -0.87827 | -0.28406 | 0.139133 | -0.37102 | 0.759422 | -0.18261 | 0.231873 | -0.61159 | 0.37681  | -0.68117 | -0.3913  | -0.37681 | -0.79771 | -0.34783 | -0.10435 | -0.64638 | -0.50435 | -0.84058 |
| HCHO T4                 | 0.089851 | 0.121738 | -0.4087  | 0.376801 | 0.611603 | -0.87537 | 0.547836 | -0.08984 | -0.70726 | 0.814499 | 0.301437 | 0.034782 | -0.06957 | 0.168114 | 0.486954 | 0.139145 | 0.057968 | 0.031884 | -0.6261  | 0.353622 | -0.43768 | 0.081161 | 0.049278 | -0.24638 | -0.02898 | 0.020294 | 0.530441 |
| HCHO T5                 | -0.64638 | -0.05218 | 0.188408 | 0.037689 | 0.89566  | -1.40869 | 0.014496 | -0.2058  | -0.36232 | -0.53334 | -0.10724 | 0.576809 | -0.2029  | -0.0145  | -0.83478 | -1.42609 | -2.50145 | -0.86377 | 0.15361  | 0.426086 | 0.666666 | -0.35941 | 0.060871 | -0.31014 | -0.54782 | 0.162323 | -0.1971  |
| Benzene T1              | -1.77971 | -0.65217 | 0.63768  | 1.58551  | 0.249268 | -1.34783 | 0.547821 | -0.22899 | -0.68985 | -0.08984 | 0.672455 | 0.753624 | -0.83189 | -0.97392 | -0.75362 | -0.15651 | -0.23189 | -0.31015 | 1.199997 | -0.14203 | -0.34203 | 0.142029 | -0.24058 | -0.82899 | -0.44058 | 0.144928 | 0.87825  |
| Benzene T2              | -1.63478 | -0.12754 | 1.452171 | -0.05217 | 0.394196 | 0.266666 | -1.24928 | -0.1971  | -3.13913 | -0.77103 | 0.176819 | 1.466667 | -0.91304 | -0.74493 | -1.12463 | -0.26956 | -0.56232 | 0.008696 | 0.028976 | 0.611595 | -0.22899 | -1.10724 | -0.17971 | -0.12464 | -0.28116 | 0.246368 | -0.829   |
| Benzene T3              | -2.12464 | -0.97391 | 0.307243 | -0.13333 | 0.63768  | -0.58841 | 0.318848 | -0.42609 | -2.41739 | -0.0087  | -0.54782 | 0.434784 | -0.71304 | -1.12174 | -0.1942  | -0.60291 | -0.07246 | -0.55942 | -0.48407 | 0.075363 | -0.72464 | -0.90434 | -0.26667 | -0.38261 | -0.04637 | -0.3768  | -0.78551 |
| Benzene T4              | -1.91304 | -1.03478 | 1.214493 | -0.36522 | 0.153625 | 0.255074 | -0.87825 | -0.75653 | -1.8087  | -0.49855 | -0.10724 | 0.66087  | -1.06087 | -1.25797 | -0.27537 | -0.71014 | -0.30435 | 0.405796 | -0.39421 | -0.24928 | 0.794203 | -0.8058  | -0.42609 | -0.06377 | -0.60579 | -0.25508 | -0.83769 |
| Benzene T5              | -2.10145 | -0.42899 | 0.837685 | 0.742035 | 0.408707 | -0.11594 | -0.89566 | 0.49855  | -1.43768 | -0.35652 | 0.049271 | 0.382607 | 0.272461 | -0.03188 | 0.5942   | 0.286957 | -0.08116 | 0.15942  | -0.08405 | 0.257973 | 0.695652 | -0.38841 | -0.12464 | -0.72464 | -0.62898 | -0.21448 | 0.304352 |
| 1,1,1 Trichloroethane 1 | -0.0029  | -0.29855 | -0.13044 | -0.48116 | -0.44348 | -0.07826 | -0.89586 | -0.0058  | -0.37392 | -0.95361 | -1.38261 | -0.83769 | -0.58551 | 0.344927 | 0.249275 | -1.18552 | -0.44348 | -0.43488 | 0.081161 | -0.06957 | -1.15653 | 1.3652   | 0.142029 | -0.3942  | -1.54202 | -0.34204 | -0.28116 |
| 1,1,1 Trichloroethane 2 | -0.15363 | 0.356522 | -0.67246 | -0.14203 | -0.09854 | -0.42319 | -0.66666 | 0.513046 | 1.008698 | 0.034775 | -0.60869 | -0.02609 | 0.063766 | 0.420288 | -0.41449 | -0.25218 | -0.54202 | -0.22899 | 0.063766 | -0.22029 | -0.22609 | 0.05217  | 0.292755 | -0.23478 | -0.74493 | -0.44348 | 0.27536  |
| 1,1,1 Trichloroethane 3 | 0.017391 | 0.136232 | 0.289856 | -0.41449 | -0.1768  | 0.089851 | -0.10436 | 0.005798 | -0.15363 | -0.05217 | -0.65797 | -0.71594 | 0.463776 | -0.13913 | -0.16522 | 0.072464 | -0.61449 | -0.8087  | 0.147827 | -0.02899 | -0.78261 | 0.023193 | 0.113045 | -0.4     | 1.657794 | 2.324646 | 2.310135 |
| 1,1,1 Trichloroethane 4 | -0.17101 | 0.176812 | -0.72754 | -0.06667 | 0.130432 | -1.40289 | 0.168121 | 0.156525 | 0.771027 | -0.43189 | -0.40579 | -0.35652 | -0.47536 | 0.055072 | -0.28696 | -0.35652 | -0.42319 | -1.01159 | 0.046371 | -0.22029 | -0.88985 | 0.60289  | 0.614494 | -0.33913 | 0.313049 | -0.03188 | 0.837677 |
| 1,1,1 Trichloroethane 5 | -0.27536 | -0.16232 | 0.478264 | -0.83768 | -0.17102 | -0.27827 | -0.49855 | -0.64348 | 0.394211 | 0.043472 | 0.118835 | -1.24348 | -0.14783 | 0.573913 | 0.330435 | -1.23769 | -0.64638 | -0.72464 | -0.42609 | 0.289848 | -0.6087  | -0.27826 | -0.0058  | 0.49855  | -0.27536 | -0.88696 | -0.9855  |
| p-Xylene 1              | -1.12754 | -1.69565 | -1.70435 | 2.124634 | 0.652161 | -0.62899 | 0.072464 | 0.524643 | 2.428986 | 0.008698 | -0.0116  | 0.597099 | 0.576813 | 1.330437 | 0.982609 | 0.020294 | 0.037674 | 0.46087  | 0.72464  | -0.47247 | -0.2058  | 0.60289  | 0.982605 | 1.289856 | -0.10434 | -0.10724 | -0.06667 |
| p-Xylene 2              | 3.463768 | 3.672464 | 1.797096 | 3.660873 | 2.333344 | -0.95073 | 0.759415 | 0.214493 | 3.278259 | 0.460861 | 0.457977 | -0.53623 | 1.124634 | 1.078255 | -0.17392 | 1.286957 | -0.06087 | -0.0087  | 1.423187 | 0.301453 | -1.67536 | 0.104355 | 2.272461 | 2.889854 | 0.098541 | 0.289856 | 0.379715 |
| p-Xylene 3              | 1.434784 | 0.878262 | -0.25217 | 3.188408 | 1.910156 | -1.51595 | -0.42029 | 0.457962 | 2.620285 | 0.173904 | -1.12174 | 0.310143 | -0.0116  | -0.11594 | 0.031883 | 0.495667 | 0.292755 | -0.68986 | 0.350723 | 0.14782  | -0.30435 | -0.30724 | 1.39711  | 0.042029 | -0.46376 | -0.15651 | -1.95943 |
| p-Xylene 4              | 2.13913  | 1.643476 | 0.773911 | 4.455078 | 1.817398 | -1.94783 | -0.07536 | 0.315933 | 2.37536  | 0.400582 | 1.10144  | -1.70725 | -0.44638 | 0.350723 | 0.28696  | 0.394211 | 0.031876 | -0.26667 | 0.915939 | 0.185501 | -0.50145 | 0.875366 | 1.800003 | 1.866661 | 0.478256 | 0.255066 | 0.353622 |
| p-Xylene 5              | 0.591301 | -0.51015 | -0.13914 | 4.252174 | 2.359421 | -2.64928 | -0.15942 | 1.246368 | 2.095657 | -0.24927 | -0.30724 | 0.333328 | 0.452179 | 0.602898 | 0.423187 | 0.379715 | -0.41159 | 0.571014 | 0.110153 | -0.33914 | -0.72464 | 0.553619 | 1.956512 | -0.15942 | -0.13623 | 0.826096 | -0.93044 |
| o-Xylene 1              | 1.466671 | 0.037682 | -0.71594 | 0.672455 | 0.298553 | -1.33333 | -0.28986 | -0.51303 | 1.994202 | 0.452164 | -1.10434 | -0.04058 | -0.84927 | -1.21449 | -1.32464 | -0.66667 | -0.43189 | 0.208696 | -0.75653 | -0.66666 | -0.28696 | -0.88406 | 3.933334 | 1.61739  | -0.22607 | -0.72752 | -0.44348 |
| o-Xylene 2              | 5.194199 | 5.266668 | 2.101456 | 0.202911 | -0.58551 | -2.33043 | -0.62898 | -0.67247 | 1.985504 | 0.494265 | -0.14347 | 1.040581 | 0.62102  | 0.072464 | -0.14993 | -0.93913 | 0.115952 | 0.055073 | -0.77683 | -0.64638 | -0.15072 | -0.24928 | 2.252174 | -0.03478 | -0.87537 | 0.10434  |          |
| o-Xylene 3              | -0.51885 | -2.66667 | -2.45797 | 1.272461 | 1.01738  | -1.26667 | 0.05217  | -0.56522 | 2.08696  | -0.27536 | -0.72174 | -0.96522 | -0.44638 | 0.315948 | 0.333336 | -0.1768  | -0.51595 | -0.42609 | -0.04639 | -0.28986 | -0.81159 | 0.263763 | 4.420303 | 1.771015 | 0.063782 | -0.30725 | 0.36232  |
| o-Xylene 4              | 2.333328 | 1.368116 | -0.17681 | 0.828979 | 0.58551  | -1.56522 | -0.93913 | 0.25798  | 3.524628 | 0.562317 | 0.24057  | -1.89565 | -0.05507 | 0.408691 | 0.049274 | 0.428986 | 0.043472 | -0.17681 | -0.02029 | -0.06957 | -0.49855 | -0.40871 | 4.72464  | 1.147827 | -0.91014 | 0.417389 | 1.066666 |
| o-Xylene 5              | 0.45507  | -0.25797 | -0.58551 | 1.243484 | 0.576813 | -0.63188 | 1.017395 | 0.826096 | 2.411591 | -0.0116  | 0.388412 | -1.34783 | 0.553619 | -0.14783 | 0.373913 | -0.46086 | 0.13913  | -0.08116 | 0.278259 | -0.13623 | -0.2     | -0.15653 | 4.759422 | 1.875362 | 1.133331 | 0.275375 | 0.147827 |
| m-Xylene 1              | -2.50435 | -3.90725 | -4.4029  | 3.904343 | 0.588409 | -0.95942 | -1.07536 | -0.31015 | 3.715942 | 1.214493 | -0.8     | -1.90435 | -1.76523 | -0.89565 | -1.26087 | -1.25507 | -1.02899 | -0.32464 | -0.35362 | -1.46377 | -0.68406 | -0.9855  | 4.057968 | 0.898548 | -1.1739  | -0.93623 | -1.76811 |
| m-Xylene 2              | 1.768116 | 0.286956 | -0.12463 | 3.884064 | 1.58551  | -0.4058  | -0.02899 | 0.605789 | 4.539139 | -0.53622 | -0.90434 | -0.6058  | 0.269562 | 0.072464 | -0.37391 | 0.707245 | -0.1971  | -0.31884 | 0.808701 | 0.011597 | 0.321739 | -0.51015 | 4.936234 | 1.388405 | -0.60291 | 0.542038 | -0.98842 |
| m-Xylene 3              | 1.753624 | 0.472465 | 0.150726 | 2.582611 | 1.133331 | -0.74783 | -0.74202 | -0.30724 | 4.678268 | -0.29565 | -1.06087 | 0.620289 | -0.03478 | 0.260872 | -0.35072 | -0.71884 | -0.52174 | -0.55362 | -0.16522 | -0.36811 | -0.04638 | 0.107239 | 4.692764 | 1.02029  | -0.52174 | -1.10434 | 0.165207 |
| m-Xylene 4              | 2.762318 | 1.631885 | 0.994209 | 4.304352 | 1.295654 | -1.15942 | 0.1884   | 1.295654 | 4.933334 | -0.09566 | 0.020294 | -0.45218 | 0.669571 | 0.255074 | -0.24058 | 0.240585 | 0.910141 | -0.98551 | 0.918839 | -0.22029 | -0.03768 | 0.507248 | 4.968109 | 0.744926 | 0.973923 | 0.8116   | -0.09566 |
| m-Xylene 5              | 1.417393 | 0.144927 | -0.16811 | 2.591309 | 1.081161 | -0.86377 | -0.73334 | -0.42319 | 4.855072 | -0.14493 | -0.9942  | 0.379709 | -0.03188 | 0.385506 | -0.4087  | -0.82898 | -0.8058  | -0.51884 | 0.121735 | -0.03188 | -0.03478 | -0.02899 | 4.524628 | 0.997101 | -0.68405 | -        |          |

|                 | R28      | G28      | B28      | R29      | G29      | B29      | R30      | G30      | B30      | R31        | G31      | B31      | R32      | G32      | B32       | R33      | G33      | B33      | R34      | G34      | B34      | R35      | G35      | B35      | R36      | G36      | B36      |
|-----------------|----------|----------|----------|----------|----------|----------|----------|----------|----------|------------|----------|----------|----------|----------|-----------|----------|----------|----------|----------|----------|----------|----------|----------|----------|----------|----------|----------|
| Control 1       | -0.1942  | -0.67246 | 0.979706 | 0.284058 | -0.46376 | 0.388412 | -0.33623 | -1.10144 | -0.21159 | -0.94492   | -0.86087 | -0.51885 | 0.249275 | 0.179703 | -0.24348  | -0.1913  | -0.88696 | -0.06667 | -0.20001 | -0.06667 | 0.452173 | 0.347828 | -0.45217 | 0.756531 | 0.510143 | -0.63768 | -0.98552 |
| Control 2       | 0.530434 | -0.14783 | 0.921741 | 0.411606 | -0.14783 | -1.13623 | -0.68115 | 0.565216 | 0.89566  | 0.023193   | 0.68985  | -0.08986 | 0.382607 | -1.01739 | 0.597107  | 0.278275 | 0.257965 | 0.257971 | -0.62318 | -0.55364 | -0.28696 | 0.405796 | -0.4     | -2.57391 | 0.472464 | -0.51884 | -1.06377 |
| Control 3       | 0.17971  | 0.13913  | 0.020294 | -0.1913  | -0.36811 | 1.049286 | 0.156525 | -0.02318 | 0.768112 | -0.25508   | -0.92464 | 0.159424 | -2.69566 | -2.14203 | -2.64928  | -0.80289 | -0.10144 | -0.02899 | -0.2029  | -0.08406 | -0.06087 | -1.57101 | -1.45508 | 1.568115 | 0.197102 | 0.057968 | 0.388412 |
| Control 4       | -0.06377 | -0.49275 | -0.50145 | 0.547821 | -0.70725 | -1.02899 | -1.29855 | -0.42319 | -0.59709 | 0.727539   | 0.263763 | -0.46957 | 0.556526 | -0.30145 | -1.31015  | -0.32465 | -0.77681 | 0.481159 | 0.075363 | -0.08986 | 0.130435 | 0.379709 | -0.07536 | -1.08695 | 0.034782 | -0.06087 | -0.66377 |
| Control 5       | -0.43478 | 0.055073 | -0.04927 | -0.07246 | -0.13044 | -0.23477 | -0.11595 | 0.742035 | -0.71884 | 0.043472   | -0.67825 | 1.040588 | -0.03768 | -0.25218 | -1.23767  | 0.727524 | -0.64638 | 0.304347 | -1.02899 | 0.286957 | 0.052174 | 0.286957 | -0.27247 | 0.46666  | 0.200001 | 0.092751 | -0.95363 |
| Ethanol 1       | -0.70725 | -0.69565 | -0.53623 | -0.8203  | 0.04348  | -0.3826  | -1.0174  | -0.32753 | -0.66667 | 0.915939   | -0.40579 | -0.39711 | -0.49565 | -0.51595 | -0.63478  | -0.88406 | -1.05797 | 0        | -0.72464 | -0.62608 | 0.02029  | 0.269566 | -0.17681 | -0.27246 | -0.26087 | -0.47247 | -0.35942 |
| Ethanol 2       | -0.18841 | -0.11884 | -0.37681 | -0.45508 | 0.197102 | 0.168121 | 0.072464 | -0.97971 | -0.03478 | -0.23479   | 0.217392 | 0.226074 | -0.33044 | -0.37682 | -0.03188  | -0.06378 | -0.09854 | 0        | 0.260864 | -0.46086 | 0        | -0.02898 | 0.101452 | 0.037682 | -0.33623 | -0.62609 | -0.38551 |
| Ethanol 3       | 0.110146 | -0.48696 | -0.24348 | 0.043488 | 0.321739 | 0.165222 | 0.171005 | -0.0145  | 0.72464  | -0.91014   | -0.94783 | -0.76811 | -0.26086 | -0.73334 | -0.91306  | -0.34203 | -0.87247 | -0.38551 | -0.16521 | -0.02609 | 0.191305 | 0.084057 | -0.55943 | -0.04928 | -0.57391 | -0.89855 |          |
| Ethanol 4       | 0.301449 | 0.144928 | -0.30145 | -0.06957 | -0.43768 | 0.649277 | -0.35652 | 0.414505 | 0.518845 | 0.339127   | 0.36232  | -2.52463 | 0.50145  | 0.41449  | -0.30435  | 0.437668 | 0.08696  | -0.07536 | -0.25507 | -0.13043 | 0        | 0.13913  | 0.15942  | 0.463768 | -0.51884 | -0.38551 | -0.02029 |
| Ethanol 5       | -0.36811 | -0.15363 | 0.255074 | -0.64928 | -0.34203 | -1.48117 | -0.97391 | -2.54782 | -2.24637 | 1.069565   | 1.814484 | 0.420303 | 0.623192 | -0.23479 | -0.31593  | -0.30435 | -0.04639 | 1.208696 | 0.41449  | -0.47246 | -0.6029  | 0.228985 | 0.426086 | -0.87246 | -0.31304 | 0.214493 | -0.44058 |
| Ethyl acetate 1 | -0.33333 | -0.14203 | -0.1884  | -0.30145 | 1.475361 | 0.25798  | -1.03767 | -0.80869 | -1.33334 | 2.028992   | 1.226089 | 0.455078 | -2.33044 | -1.08116 | -0.91014  | -2.829   | -3.41739 | 0.005797 | 2.217392 | -0.50435 | -1.2029  | 0.263767 | 0.208694 | -0.70145 | 0.34203  | 0.217392 | 0.060867 |
| Ethyl acetate 3 | -0.44928 | 0.026089 | 0.353622 | -0.58841 | -0.06087 | -0.11014 | -0.79131 | -0.44638 | -1.12175 | -0.45796   | 0.852173 | 0.318832 | 0.09565  | -0.3768  | -0.33333  | -4.31885 | -4.30145 | 0        | -1.09564 | -0.67827 | 0.42029  | -0.11304 | -0.18551 | 0.005798 | 0        | 0.118843 | -1.51305 |
| Ethyl acetate 4 | -0.38841 | -0.5942  | -0.24638 | -0.31303 | 0.156521 | 0.672455 | -0.88696 | -0.27536 | -1.48406 | 1.823189   | 3.489853 | 2.113037 | -0.69855 | 0.391304 | -0.75362  | -2.97391 | -4.09566 | 0.026087 | 0.597107 | -1.66957 | -0.41449 | -0.3971  | -0.28696 | -0.01159 | 0.507248 | -0.21449 | -1.32464 |
| Ethyl acetate 4 | 0.04348  | -0.04927 | -0.18551 | -1.69855 | -0.68985 | -0.77391 | -1.2029  | -1.29565 | -0.23767 | -1.04637   | -1.47536 | -0.28986 | 0.066666 | -0.0087  | -0.94492  | -4.45508 | -5.53334 | 0        | -0.8029  | -1.4174  | 0.371016 | -0.29275 | 0        | -0.96522 | 0.47826  | -0.92754 | -0.10145 |
| Ethyl acetate 5 | 0.115944 | -0.15652 | -0.0029  | -0.13623 | -0.33333 | -1.24347 | -0.60289 | -0.53622 | -0.93623 | -0.95071   | -1.68117 | -1.79131 | 0.591301 | 0.307251 | -0.31883  | -3.87825 | -4.74202 | 0.197101 | -0.30724 | -0.87827 | 0.257971 | 0.347828 | 0.472466 | -0.27246 | 0.411594 | -0.30725 | -0.46957 |
| Isopropanol 1   | -0.42319 | -0.3971  | -0.81739 | -0.2058  | 0.069572 | -1.05508 | -1.13625 | -1.53044 | -1.34043 | -1.2029    | -0.64638 | -0.90724 | -0.71304 | -0.15942 | 0.318832  | -0.46088 | -0.24638 | 0.333333 | -1.72174 | -0.94203 | -1.33623 | 0.02029  | 0.191305 | 0.153625 | -0.2087  | -0.55625 | -0.5942  |
| Isopropanol 2   | 0.17971  | 0.220291 | 0.478256 | 0.008698 | -0.23188 | -0.01158 | -0.02029 | -0.20869 | -1.02899 | -0.30724   | -0.77971 | -0.21449 | -0.66666 | -0.37392 | -0.51305  | -0.13623 | -0.12174 | -0.34783 | -0.78551 | 0.031891 | 0.495653 | -0.02029 | -0.35652 | -0.16232 | -0.14203 | 0.228981 | 0.489853 |
| Isopropanol 3   | -0.04058 | 0.037682 | -0.8087  | 0.182617 | 0        | -0.24347 | -0.29565 | -0.9884  | -1.78841 | 0.608688   | 0.921738 | 0.371002 | -0.57681 | -0.13913 | -1.04347  | -0.04059 | 0.373917 | -0.46377 | 0.005798 | 0.692749 | -0.70145 | 0.103437 | -0.29565 | -0.31885 | -0.17392 | -0.08405 | -0.47247 |
| Isopropanol 4   | 0.130432 | -0.15363 | -0.26957 | 0.36232  | 0.234787 | -0.42899 | 0.089859 | -0.29276 | -0.54204 | 0.742035   | 1.121735 | -0.39131 | -0.02029 | -0.47826 | -0.65797  | -0.75073 | -1.16232 | -0.1913  | -1.42319 | -0.71594 | -0.48116 | -0.07246 | 0.240578 | -0.55942 | -0.19421 | -0.10435 | -0.11594 |
| Isopropanol 5   | -0.11015 | 0.31884  | -0.38551 | -0.44058 | -0.83479 | -0.89565 | -1.06957 | -1.14203 | -1.67247 | 1.768112   | 2.159424 | 2.605804 | -0.55362 | -0.59131 | -0.67825  | 0.028992 | -0.76231 | -1.64058 | -0.23769 | 0.391312 | 2.310144 | 0.214493 | -0.16232 | -0.31594 | 0.014492 | 0.382614 | -0.31014 |
| MEK 1           | -1.06087 | -1.06957 | -0.29276 | -0.22899 | 0.055077 | -1.70725 | -0.10724 | 0.063766 | 0.402893 | 0.605789   | 0.631882 | 0.315948 | -0.10436 | -0.31305 | 0.2011597 | 3.579712 | -0.26088 | -0.64638 | 0.640579 | -1.57971 | -1.98551 | -0.04638 | -0.3971  | -2.23188 | 1.06087  | 1.185509 | -1.35362 |
| MEK 2           | 0.689854 | 0.594204 | -0.3913  | 0.388397 | 0.962318 | -0.28696 | 1.182602 | -0.11885 | 0.040573 | 1.736237   | 1.098541 | 1.365219 | 0.762314 | 0.605789 | 1.515945  | 3.234787 | -0.05797 | 0.469574 | 1.588394 | 1.049275 | 0.518841 | 0.724637 | -1.28986 | 1.118841 | 0.886955 | -1.33623 |          |
| MEK 3           | 0.275368 | -0.09855 | -0.16232 | 0.118851 | 0.098549 | 1.147827 | 0.48407  | -0.07246 | 0.237686 | 0.107254   | 0.379715 | -0.04639 | -0.40579 | 0.179703 | -1.0058   | 0.936234 | -1.18262 | 0        | 0.593139 | -0.6058  | 0.005797 | 0.081159 | 0.37971  | -1.32464 | 0.936233 | 0.939129 | -1.3942  |
| MEK 4           | -0.65217 | 0.028984 | -0.12174 | -0.0029  | 0.081154 | 0.168121 | 0.600006 | 0.220291 | 0.191299 | 0.176804   | 0.385498 | -0.9942  | 1.023178 | -0.19711 | -0.06668  | 1.08696  | -0.44928 | 0        | 0.260864 | 0.713043 | -0.5913  | 0.162319 | 0.524637 | -1.42319 | 0.411594 | 1.046735 | -1.32754 |
| MEK 5           | 0.286957 | -0.31305 | 0.063766 | -0.13913 | -0.02898 | 0.005783 | -0.04637 | 0.234787 | 0.991302 | -0.14493   | 0.220291 | -1.22029 | -0.33043 | -0.22609 | -2.37682  | 1.75943  | -0.10144 | 0        | -1.21449 | 0.426086 | 1.333333 | 0.307246 | 0.373913 | -1.37391 | 0.797101 | 0.452175 | -0.55072 |
| Styrene 1       | -0.04928 | -0.0058  | 0.826088 | -1.40581 | -1.34493 | -1.49565 | -0.46668 | -0.83188 | -1.53622 | -0.66667   | 0.092758 | -1.02898 | -0.22029 | -0.32755 | -2.28406  | 2.060867 | -1.95943 | 0        | -0.96523 | -0.62029 | 0.895653 | -0.9942  | -1.35362 | -2.43189 | 1.237681 | 0.762318 | -1.79131 |
| Styrene 2       | 0.715942 | 0.408691 | 0.095654 | -0.45508 | -0.17391 | 0.113037 | -1.02899 | -1.0029  | -0.57681 | -1.53044   | -1.05797 | -1.16232 | 0.075363 | -0.06957 | -0.54492  | 1.663773 | -1.83769 | 0        | 0.695648 | -0.48985 | -0.85797 | 0.289855 | 0.344927 | -2.13333 | 1.202899 | 0.97971  | -2.31885 |
| Styrene 3       | -1.09565 | -0.70435 | -1.16522 | -0.02898 | -1.02319 | -1.6116  | -0.02899 | -0.27246 | 0.608688 | 0.121735   | -0.64058 | 1.263779 | -0.34782 | -0.0058  | 0.072464  | 1.721741 | -1.28696 | 0        | -1.12175 | 0.281158 | -0.28406 | 0.405797 | 0.301449 | -3.17681 | -1.16812 | -1.45507 | -4.61739 |
| Styrene 4       | 2.220291 | 1.794205 | 0.776814 | 1.156509 | -0.30724 | -1.13333 | 0.573914 | 0.452179 | -0.6203  | -0.31015   | 0.605789 | 0.252167 | -0.93623 | -0.44928 | -0.45508  | 0.646378 | -0.98842 | 0        | -0.57391 | 0.681152 | 1.113045 | 0.144928 | 0.072464 | -1.97971 | 0.50145  | 0.503439 | -2.52464 |
| Styrene 5       | 0.295654 | 0.469566 | -1.0058  | 0.107239 | 0.205795 | 0.597092 | -0.24927 | 0.147827 | 2.110138 | 0.24057    | 0.733337 | 0.773911 | 0.023186 | 0.426086 | -0.40001  | 2.968109 | -1.32753 | 0        | -0.09856 | 0.379715 | -1.43768 | -0.06087 | -0.10435 | -1.73334 | 0.631884 | 0.70435  | -0.85217 |
| Acetone 1       | -1.25507 | -0.77681 | -0.72464 | -0.35072 | -0.11884 | -1.8116  | -1.22319 | -1.6116  | -1.75362 | -0.37972   | 0.443481 | 0.359421 | -0.58551 | -1.08116 | -1.45218  | -0.26668 | -4.76521 | 0        | -2.55364 | -1.1971  | 0.133333 | -0.06087 | -0.0087  | -2.84638 | 0.075362 | 0.507248 | -3.37681 |
| Acetone 2       | -0.1913  | -0.11884 | -0.33913 | 0.333328 | 1.315941 | -0.92754 | 0.171005 | -0.07246 | -1.09854 | 0.591309   | 0.069565 | 0.063766 | 0.086952 | -0.22609 | -0.27428  | 2.226089 | -3.0087  | 0        | 0.150726 | 0.150726 | 0.02029  | 0.113043 | 0.411594 | -2.77102 | 0.37971  | 0.005798 | -2.89565 |
| Acetone 3       | -0.13334 | -0.24348 | 0.069565 | 0.356522 | 0.4058   | -2.23479 | -0.28406 | -0.51883 | -0.93044 | 0.524643   | 0.385513 | 1.797089 | 0.014496 | 0.220291 | 0.426086  | 1.507248 | -3.55072 | 0        | -0.829   | 0.246384 | 0.023188 | 0.318841 | 0.249275 | -2.92175 | 0.724638 | 0.171017 | -2.46087 |
| Acetone 4       | 0.049274 | 0.217392 | -0.27536 | 0.373917 | 0.38261  | -0.0029  | 0.530441 | 0.382599 | -0.88117 | 1.011597   | 0.889862 | 0.527527 | 0.394203 | 0.721741 | -0.29565  | 2.014496 | -5.50145 | 0        | 0.228989 | 1.371017 | 1.272464 | -0.01449 | 0.162319 | -2.33334 | 0.197101 | 0.828985 | -2.69275 |
| Acetone 5       | 0.098549 | 0.060871 | 0.301449 | 0.475357 | 0.020294 | -2.07536 | -0.86667 | -1.16232 | -1.66666 | 0.220276   | -0.02609 | 1.214493 | 0.060867 | 0.25798  | 0.44928   | 1.13913  | -3.33624 | 0        | -0.88115 | 0.1884   | 0.008696 | 0.342029 | 0.113044 | -3.11014 | 0.860869 | 0.968117 | -2.42899 |
| Chloroform 1    | 0.200001 | -0.0029  | -0.10145 | 0.886963 | 0.823189 | 2.939133 | -1.12753 | -0.76811 | -0.83188 | 0.643478</ |          |          |          |          |           |          |          |          |          |          |          |          |          |          |          |          |          |

|                     | R1       | G1       | B1       | R2       | G2       | B2       | R3       | G3       | B3        | R4       | G4       | B4       | R5       | G5       | B5       | R6        | G6       | B6       | R7       | G7       | B7       | R8       | G8       | B8       | R9       | G9       | B9       |
|---------------------|----------|----------|----------|----------|----------|----------|----------|----------|-----------|----------|----------|----------|----------|----------|----------|-----------|----------|----------|----------|----------|----------|----------|----------|----------|----------|----------|----------|
| ethyl acetate 1     | -0.64638 | 0.620289 | -0.32464 | -0.03478 | -0.35941 | 0.686951 | 0.36232  | 0.562325 | -0.56232  | -0.6261  | -0.12754 | 0.252174 | 0.84639  | 0.428986 | 0.739128 | 0.118843  | 0.04348  | 0.121738 | 0.023188 | -0.6087  | -1.1797  | 0.191299 | -1.92754 | -2.36522 | 6.588406 | 1.684059 | -30.7797 |
| ethyl acetate 2     | -0.3913  | 0.011593 | 0.168116 | -0.77681 | 0.460869 | -0.39131 | -0.08116 | 0.240578 | 1.168121  | -0.47827 | -0.35941 | 0.753624 | 0.011597 | 0.162315 | -0.15942 | 0.414947  | 0.640579 | -0.11014 | 0.023188 | -0.27536 | -2.26956 | -0.36232 | -0.82898 | -2.03478 | 4.49855  | 1.49855  | -23.258  |
| ethyl acetate 3     | -0.08116 | 0.153622 | 0.121739 | 0.095657 | 0.066666 | -1.05508 | -0.05798 | 0.257973 | -1.65797  | -0.44927 | -0.43478 | -0.22899 | -0.46668 | 0.594208 | 0.113045 | 0.446381  | 1.495651 | 1.24638  | 0.057971 | -0.67246 | -1.74783 | -0.07826 | -0.78841 | -2.75942 | 5.15942  | 1.05797  | -25.1855 |
| ethyl acetate 4     | -0.08696 | 0.205799 | 0.286956 | 0.255066 | 0.240578 | -0.23769 | -0.91306 | 0.373917 | -0.33913  | 0.228989 | -0.53333 | 0.327538 | -0.24928 | -0.22897 | -0.10725 | -0.63188  | 0.115944 | -0.01159 | 0.026087 | -0.47246 | -1.27826 | 1.046387 | -1.15942 | -1.46087 | 4.17971  | 0.904348 | -24.0928 |
| ethyl acetate 5     | -0.08847 | 0.167448 | 0.132696 | 0.104266 | 0.072666 | -1.15004 | -0.0632  | 0.281191 | -1.80719  | -0.4897  | -0.47391 | -0.2496  | -0.50868 | 0.647687 | 0.123219 | 0.486555  | 1.63026  | 1.358554 | 0.063188 | -0.73299 | -1.90514 | -0.08531 | -0.85936 | -3.00777 | 5.623768 | 1.153187 | -27.4522 |
| iso-Propanol 1      | -0.31884 | 0.446377 | -0.07826 | 0.075363 | 0.228981 | -0.15653 | -0.23189 | 0.58551  | -0.17102  | 0.611588 | -0.0029  | -0.68986 | 0.002899 | 0.588409 | -1.21449 | -0.5855   | 0.394203 | -0.00869 | 0.246377 | -0.53333 | -1.50145 | 0.159409 | -0.82318 | -2.22029 | 3.307247 | 0.086958 | -13.1826 |
| iso-Propanol 2      | 0.017395 | 1.089555 | -0.18261 | 0.701447 | 0.678261 | -1.28406 | 0.655075 | 0.831886 | -0.41159  | 1.805801 | 0.13913  | 0.211601 | 0.034775 | 0.678261 | -1.22608 | -0.35072  | 0.449272 | -0.82609 | 0.171015 | -0.53623 | -1.12753 | 1.611588 | 0.057968 | -0.20139 | 2.214493 | -0.23768 | -8.68405 |
| iso-Propanol 3      | -0.9971  | 0.54203  | -0.31014 | 0.153625 | -0.24928 | 0.191299 | 0.043488 | 0.153618 | -0.48985  | -0.26666 | -0.30724 | 0.452179 | 0.944931 | -0.07826 | -0.09565 | 0.214493  | 0.646378 | 0.947826 | 0.330435 | -1.29275 | -2.44927 | -0.27246 | -0.90146 | -1.77971 | 4.188406 | 0.521738 | -12.1015 |
| iso-Propanol 4      | -0.9855  | 0.65797  | 0.043478 | -0.22609 | 0.736229 | -1.13913 | 0.263763 | 0.165215 | -0.63768  | 0.576813 | 0.011597 | 0.402901 | -0.31883 | 0.521744 | -1.3971  | -0.23768  | 0.368111 | -0.02319 | 0.037681 | -1.08986 | -1.49855 | -0.30145 | -0.06087 | -0.61739 | 2.997101 | -0.07536 | -8.88695 |
| iso-Propanol 5      | -0.73913 | 0.26667  | 0.301449 | 0.434784 | 0.199997 | 0.037674 | 0.298538 | 0.50724  | -0.17101  | 1.536224 | -0.71594 | 0.298553 | 0.13913  | 0.527534 | -1.03478 | -0.43189  | 0.278259 | -0.49855 | 0.104348 | -1.10145 | -0.1913  | 0.924637 | 0.017395 | -0.51304 | 3.698551 | -0.03768 | -9.85219 |
| Styrene T1          | -0.42319 | 0.985504 | 0.904348 | 0.620285 | 0.872467 | 0.049271 | 0.373917 | 0.289856 | 1.089859  | -0.25508 | 0.376816 | 1.672462 | -0.88406 | 0.713043 | -3.34493 | -2.09565  | 1.605797 | -1.18841 | 0.556522 | -2.87536 | -5.53914 | 4.588409 | -15.1826 | -21.4261 | 71.15652 | 54.91015 | -103.229 |
| Styrene T2          | -2.08986 | 1.524639 | 1.34203  | 0.376816 | 0.524643 | 0.376816 | 0.34494  | 0.533333 | 0.382599  | -0.30144 | 0.45507  | 0.602898 | -1.29854 | 0.976807 | -6.25797 | -2.12754  | 2.171021 | -0.35073 | 0.585507 | -1.63189 | -5.29565 | 3.794205 | -16.5884 | -18.4058 | 72.76521 | 56.17101 | -107.078 |
| Styrene T3          | -2.74493 | 1.524635 | 0.855072 | -0.57681 | 0.089859 | -0.0029  | -0.53912 | 0.057968 | -0.22029  | -0.73914 | -1.10725 | 0.110146 | -1.79131 | -0.10725 | -5.82029 | -1.63188  | 0.652176 | -0.62898 | 0.605797 | -1.7942  | -7.67825 | 2.765228 | -19.3971 | -17.8696 | 68.76232 | 53.25797 | -98.7826 |
| Styrene T4          | -2.26666 | 0.698551 | 1.171015 | 0.110138 | -0.18262 | -0.29565 | -0.49855 | 0.165215 | 0.50145   | 0.420288 | -0.05797 | 0.173912 | -0.95363 | 0.434784 | -4.65508 | -1.75073  | 1.73333  | -0.38551 | 0.915942 | -1.73333 | -6.32175 | 4.286942 | -20.1855 | -19.1768 | 69.26666 | 54.58841 | -98.2145 |
| Styrene T5          | -1.64928 | 1.52174  | 1.171014 | -0.26666 | 0.704346 | -0.69566 | -0.22899 | -0.21159 | 1.513046  | 0.081161 | -0.11305 | 0.684059 | -0.75942 | 0.359421 | -6.82609 | -1.64593  | 1.289856 | -0.51594 | 1.191304 | -2.02898 | -7.1942  | 3.915955 | -20.5797 | -19.3304 | 78.32465 | 62.9855  | -102.907 |
| p-Dichlorobenzene 1 | -0.35942 | 0.194202 | -0.01449 | -0.30435 | 0.095642 | 0.211594 | 0.272461 | 0.278259 | 1.202896  | -0.55362 | -0.6087  | -0.44927 | -0.69275 | 0.84639  | -0.04347 | -0.174536 | 0.118835 | -0.15073 | 0.113043 | -0.68116 | -2.40001 | -0.11595 | -1.65797 | -1.75652 | 5.626087 | 1.779709 | -13.3652 |
| p-Dichlorobenzene 2 | -0.55362 | 0.098553 | 0.646377 | 0.176804 | 0.304337 | 1.457977 | -0.11885 | 0.269562 | 0.495651  | -0.35942 | 0.521736 | -0.24348 | -0.82898 | 0.50145  | -0.6087  | -0.96522  | -0.33913 | -0.34203 | 0.315942 | -1.17681 | -5.74782 | 0.434784 | -1.66956 | -3.54493 | 6.513042 | 2.573914 | -14.571  |
| p-Dichlorobenzene 3 | -1.06667 | 0.657974 | 0.626087 | -0.13045 | 0.162323 | -0.37682 | -0.22319 | 0.113045 | 1.399994  | 0.226089 | -0.57681 | -1.03188 | 0.072464 | 0        | -2.88406 | -0.29565  | 0.608696 | -0.37681 | 0.17971  | -0.86956 | -2.3826  | -0.12174 | -0.96231 | -3.28696 | 5.97681  | 1.527534 | -15.4319 |
| p-Dichlorobenzene 4 | -1.24059 | 0.315941 | -0.06377 | -0.52174 | -0.31885 | -0.11014 | -0.58841 | 0        | 0.968109  | -0.73334 | 0.13913  | 0.063766 | -0.39421 | -0.18552 | 0.214493 | -0.41449  | 0.310143 | 0.455072 | 0.150725 | -0.63189 | -2.06087 | 0.292755 | -1.79131 | -2.01739 | 5.133331 | 1.84058  | -13.4377 |
| p-Dichlorobenzene 5 | -1.42899 | 0.991306 | 0.33913  | 0.579712 | -0.57681 | 1.223175 | 0.098557 | 0.886955 | 1.443481  | -0.22899 | -0.24348 | 0.159416 | -0.86667 | -0.0029  | -5.5884  | -0.22029  | 0.562317 | -0.04638 | 0.655072 | -1.30145 | -2.90434 | 0.773926 | -2.01738 | -2.07536 | 6.631882 | 2.4058   | -14.6985 |
| Acetone 1           | -1.42899 | 0.82029  | 0.173913 | -0.06957 | 0.602905 | -0.44928 | -1.52754 | 0.550728 | -0.79421  | -0.15071 | -0.12174 | 0.284058 | -0.44348 | -0.56522 | 1.144928 | -0.4      | 0.715942 | -0.13044 | 0.110145 | -1.22029 | 1.220291 | 0.965225 | -1.82318 | -4.11304 | 8.901451 | 3.614491 | -23.1275 |
| Acetone 2           | -0.69856 | 0.228985 | 0.202898 | -1.11015 | -0.05797 | -0.31015 | 0.037674 | 0.368111 | 0.084061  | -0.66667 | -0.4     | -0.17391 | 0.040573 | -0.2     | -0.10145 | -0.87826  | -0.01739 | -0.53333 | 1.437681 | 0.118843 | -2.15073 | -0.07825 | -2.08116 | -4.10145 | 9.127537 | 3.991306 | -23.6725 |
| Acetone 3           | -1.22029 | 0.347824 | -0.04638 | 0.008698 | -0.26376 | 0.049271 | 0.214493 | 0.185501 | 0.53624   | -0.09566 | -0.36232 | -0.70145 | 3        | 2.649277 | 0.066666 | -0.3971   | -0.31884 | -0.10145 | 0.075362 | -1.02319 | -0.21159 | 1.037674 | -1.55362 | -5.43768 | 7.846378 | 3.185509 | -20.5391 |
| Acetone 4           | -0.95943 | 0.878262 | -0.11304 | -0.40159 | -0.46086 | 0.026093 | -0.45798 | 0.197098 | 0.626099  | -0.85507 | 0.591309 | -0.24928 | -0.02319 | -0.47247 | -0.18551 | 0.237679  | 1.115944 | 0.373913 | 0.075362 | -1.17391 | -0.11595 | 0.298553 | -1.42609 | -3.30435 | 10.0029  | 4.802898 | -25.5015 |
| Acetone 5           | -1.15653 | 0.718842 | -0.64058 | 0.150726 | 0.124634 | -0.68985 | -0.26086 | 0.347832 | -0.36232  | -0.16811 | -0.08405 | 0.246376 | 0.373917 | 0.008698 | 0.965218 | -0.17392  | -0.15653 | 0.446377 | 0.185507 | -0.87536 | -0.15073 | 0.771027 | -1.87827 | -3.44638 | 7.965218 | 3.237682 | -19.2667 |
| MEK T1              | 0.18261  | 0.133335 | 0.385507 | 1.075363 | 0.278259 | 0.391312 | 0.420303 | 0.252174 | -0.74204  | 0.228989 | -0.81449 | 0.507248 | 1.171021 | 0.513046 | 1.220291 | -0.55653  | 0.081161 | 0.646378 | 0.185507 | -0.65507 | 0.031891 | 2.014481 | -2.93913 | -6.55942 | 21.34493 | 12.74493 | -49.2087 |
| MEK T2              | -0.52753 | 0.284058 | -0.02029 | -0.22609 | 0.130432 | 0.385513 | -1.44058 | 0.985504 | -0.37972  | -0.16521 | 0.057968 | -1.15072 | -0.55652 | 0.489853 | -0.13623 | 0.069565  | 0.020294 | 0.460869 | 0.2      | -1.15073 | -1.74783 | 1.701447 | -3.05508 | -7.46667 | 24       | 14.62029 | -52.6058 |
| MEK T3              | -0.59711 | 0.455074 | 0.565218 | -0.36232 | -0.08695 | -1.05217 | -0.40871 | 0.286957 | 1.12175   | 0.304352 | -0.25507 | 0.466667 | 0.437683 | 0.089844 | 0.707253 | -0.52753  | 0.437683 | -0.24348 | 0.252174 | -1.24928 | -1.06957 | 1.399994 | -3.0058  | -6.2087  | 22.68985 | 13.12754 | -50.3478 |
| MEK T4              | -0.46956 | 0.330433 | 0.771014 | 0.182602 | -0.3913  | 0.32753  | 0.657974 | 0.411591 | -0.25217  | 0.698547 | 0.234779 | 0.620285 | 0.788406 | -0.48695 | 1.202896 | -0.3913   | 0.423187 | 0.298552 | 0.313043 | -1.10145 | 0.489853 | -0.21449 | -2.33334 | -5.50145 | 19.82898 | 11.42029 | -47.3391 |
| MEK T5              | -0.84638 | 0.260872 | -0.22029 | 0.249268 | 0.692764 | -0.09276 | 0.237671 | 0.26667  | 0.26088   | 0.043488 | 0.376816 | -0.23188 | -0.2     | -0.08696 | 0.513046 | -0.52464  | 0.605797 | -0.41159 | 0.275362 | -1.0058  | -1.53622 | 1.44928  | -3.55652 | -6.90145 | 26.16522 | 15.81739 | -55.9623 |
| Limonene 1          | -0.94782 | -0.62029 | -0.75942 | -1.69565 | -2.37392 | -2.83189 | 2.875366 | 2.669571 | 4.437675  | -0.36522 | -0.6058  | 0.281158 | -0.16232 | -0.06957 | -0.09565 | -1.12753  | 0.046379 | -0.74493 | -0.02899 | -0.88696 | -0.69565 | 1.495651 | -3.51885 | -3.31884 | 5.417389 | 2.205799 | -12.6551 |
| Limonene 2          | 0.460876 | 0.834785 | 0.13913  | 0.547821 | 0.347824 | 0.484062 | 0.269562 | 0.724632 | -0.8029   | 0.214493 | -0.15653 | 0.165218 | -2.9913  | 1.031883 | -3.74493 | -0.63479  | 0.13913  | -1.13333 | -0.1913  | -1.42609 | -0.1797  | 1.144928 | -2.75652 | -3.43189 | 6.208698 | 3.02319  | -14.7768 |
| Limonene 3          | 0.159416 | 0.837677 | -0.02609 | 1.057968 | 1.420288 | 2.417397 | 2.875366 | 3.263763 | 0.4040581 | -1.08985 | -0.9942  | -0.22319 | 2.507248 | 1.959423 | 0.330435 | 1.481159  | 0.84058  | -0.08986 | -0.58551 | -1.82319 | -1.49565 | 0.924652 | -3.17972 | -3.13913 | 5.428986 | 1.994202 | -16.0087 |
| Limonene 4          | -0.68696 | 0.243477 | -0.32754 | 0.469574 | 0.205795 | -0.21739 | 1.008698 | 1.191299 | 0.026077  | 0.057968 | -0.62609 | 0.886959 | 0        | 0.643478 | 1.185505 | -0.44927  | 0.527534 | 0.008696 | -0.05507 | -0.9971  | -0.14493 | 1.101456 | -3.44348 | -3.14783 | 5.489855 | 2.249275 | -15.2493 |
| Limonene 5          | -1.89565 | -0.29565 | 0.2      | -1.64928 | -2.05797 | -2.26667 | -1.02608 | 0.342033 | -1.02609  | 0.884064 | 1.084061 | 1.197102 | -0.14783 | 0.008698 | 0.107246 | -0.46377  | 0.014496 | -0.22899 | -0.47536 | -1.7913  | -1.23189 | 1.904343 | -3.94782 |          |          |          |          |

|                     | R10      | G10      | B10      | R11      | G11      | B11      | R12      | G12      | B12      | R13      | G13      | B13      | R14      | G14      | B14      | R15      | G15      | B15      | R16      | G16      | B16      | R17      | G17      | B17      | R18      | G18      | B18      |
|---------------------|----------|----------|----------|----------|----------|----------|----------|----------|----------|----------|----------|----------|----------|----------|----------|----------|----------|----------|----------|----------|----------|----------|----------|----------|----------|----------|----------|
| ethyl acetate 1     | -0.01739 | -2.85217 | -0.15362 | 3.77971  | 1.950722 | -27.3855 | 5.881165 | 2.449265 | -0.55362 | 18.66377 | 14.24057 | -5.90145 | 9.431885 | 7.45507  | -3.09275 | 0.014493 | -1.07246 | -3.829   | 0        | -1.68115 | -3.82608 | 0.489853 | 0.255081 | 0.066666 | -0.56522 | -0.29855 | 3.701447 |
| ethyl acetate 2     | 0.046377 | -2.18551 | 0.373917 | 0.133333 | 1.136238 | -21.4377 | 6.199997 | 2.608704 | -1.73043 | 18.52173 | 13.04639 | -5.27247 | 8.162315 | 7.176811 | -2.73334 | -0.0029  | -1.04927 | -1.64348 | 0        | -1.83189 | -2.59419 | 0.249283 | 0.049271 | -0.06957 | -0.6348  | -0.03478 | 2.866669 |
| ethyl acetate 3     | 0.113043 | -1.9884  | 0.269569 | 3.228985 | 0.834778 | -22.6841 | 5.562317 | 2.599991 | -1.32464 | 16.47827 | 12.3855  | -5.17681 | 8.252174 | 6.672466 | -0.06667 | 0.04058  | -1.53043 | -3.61159 | 0        | -2.13913 | -3.19421 | -0.17101 | 0.507248 | -1.32753 | -0.09854 | 1.252174 | 2.379707 |
| ethyl acetate 4     | -0.13623 | -3.14783 | 0.913048 | 3.994203 | 1.055609 | -23.2087 | 5.504349 | 2.292755 | -1.93044 | 17.73624 | 14.12175 | -5.9971  | 9.014488 | 7.052174 | -2.42319 | 0.008696 | -1.01739 | -1.76231 | 0        | -1.88696 | -1.08986 | 0.1884   | 0.371002 | 1.617386 | -1.32463 | 0.315941 | 3.684059 |
| ethyl acetate 5     | 0.123217 | -2.16736 | 0.29383  | 3.519594 | 0.909908 | -24.7256 | 6.062926 | 2.83399  | -1.44385 | 17.96132 | 13.50019 | -5.64272 | 8.99487  | 7.272988 | -3.34267 | 0.044232 | -1.66817 | -3.93663 | 0        | -2.33165 | -3.48169 | -0.1864  | 0.5529   | -1.44701 | -0.10741 | 1.36487  | 2.593881 |
| iso-Propanol 1      | -1.08696 | -3.35942 | 0.162323 | 1.142029 | -1.02898 | -13.8899 | 4.113037 | 1.530426 | -1.22899 | 9.005798 | 6.573914 | -3.67247 | 6.466667 | 5.124641 | -2.10435 | 0        | -1.17101 | -2.40001 | 0        | -2.4058  | -2.6956  | 0.162308 | 0.582596 | -1.44638 | -0.33334 | -1.03188 | 3.515942 |
| iso-Propanol 2      | -0.09565 | -3.49855 | 1.782608 | -0.01739 | -3.72464 | -8.66376 | 2.539139 | 1.58551  | -0.97971 | 7.304352 | 5.805801 | -3.67826 | 6.443481 | 4.431885 | -2.77971 | 0.121739 | -1.17101 | -1.73044 | 0        | -1.66087 | -1.93044 | 0.698563 | 0.747833 | 0.371002 | -1.71304 | -2.65797 | 3.211594 |
| iso-Propanol 3      | -0.24348 | -2.61159 | 2.324638 | 0.333333 | -1.6     | -9.89856 | 2.423187 | 0.084061 | -0.83768 | 6.347824 | 5.197098 | -4.08985 | 6.591301 | 4.881157 | -1.73913 | 0.04058  | -1.59131 | -2.96811 | 0        | -1.77971 | -0.22609 | 0.791306 | 0.614487 | 1.568115 | -0.90434 | 0.478264 | 4.423191 |
| iso-Propanol 4      | -0.0058  | -3.2     | 2.110146 | 0        | -2.95073 | -6.32173 | 2.278259 | 0.368118 | -1.83189 | 5.382614 | 4.744934 | -3.09855 | 5.90435  | 4.472466 | -1.4087  | 0.014493 | -1.66377 | -3.03189 | 0.008696 | -1.71304 | -1.14783 | 1.037689 | 1.22319  | 0.985504 | -1.50145 | -0.53913 | 2.646378 |
| iso-Propanol 5      | -0.06087 | -3.43768 | 2.269569 | 0.026087 | -1.83188 | -9.10724 | 2.889862 | 0.652176 | -0.68986 | 8.13913  | 6.655075 | -3.14493 | 6.124634 | 4.54493  | -1.8029  | 0.02029  | -1.90725 | -1.93913 | 0.017391 | -2.09565 | -2.28406 | 0.785507 | 0.89566  | -0.46957 | -0.87827 | -0.84348 | 3.765217 |
| Styrene T1          | 4.672463 | 10.46667 | -53.9623 | 125.2638 | 45.18261 | -99.5275 | 2.86087  | 2.733322 | 0.675362 | 9.67247  | 9.605804 | -1.50145 | 21.71304 | 21.67246 | -6.55942 | 0.617391 | -0.57681 | -20.2145 | 3.97971  | -4.58551 | -11.3739 | 0.689865 | 1.046371 | -0.17102 | 0.579712 | 0.008698 | 0.89856  |
| Styrene T2          | 2.771014 | 9.452171 | -56.7217 | 99.4174  | 44.92175 | -104.429 | 2.936234 | 3.55072  | -0.03768 | 11.1797  | 9.82608  | -3       | 18.18841 | 18.56812 | -6.50145 | 0.176812 | -1.33913 | -20.0783 | 0.005797 | -4.32464 | -11.8    | 1.773911 | 0.756531 | 0.466675 | 0.075363 | 0.971012 | 2.634785 |
| Styrene T3          | 1.527536 | 6.460869 | -53.2406 | 99.23769 | 42.22028 | -96.4609 | 3.878265 | 2.739136 | -1.32753 | 6.594208 | 6.962311 | -3.42899 | 16.68116 | 17.54203 | -6.02319 | 0.103438 | -1.55072 | -22.5449 | 0.110145 | -5.49275 | -13.3188 | -0.32753 | -1.20001 | -1.8058  | 0.828979 | 0.536232 | 3.043476 |
| Styrene T4          | 1.901449 | 7.15942  | -52.913  | 124.1391 | 50.68115 | -102.377 | 2.73912  | 3.872467 | -2.15942 | 7.414505 | 6.788406 | -1.51014 | 17.0029  | 18.1942  | -4.47537 | 0.295652 | -0.83768 | -23.5826 | 0.692754 | -4.64638 | -13.8493 | 0.985504 | 0.353622 | -0.83768 | 0.542038 | 1.23188  | 2.684055 |
| Styrene T5          | 4.828985 | 11.63189 | -62.229  | 108.7681 | 46.16522 | -98.8812 | 4.249283 | 3.750717 | -1.62609 | 9.518829 | 6.94783  | -2.75073 | 19.67825 | 21.46377 | -5.12174 | 0.426087 | -0.62609 | -23.4696 | 0.205797 | -5.15942 | -12.9246 | 1.368118 | 1.055084 | -0.72464 | 1.249268 | -0.61449 | 1.840584 |
| p-Dichlorobenzene 1 | -0.11884 | -3.04927 | -2.84927 | 6.704348 | 1.394203 | -17.2348 | -0.22319 | 0.223175 | 1.646378 | 2.857971 | 2.617386 | -2.84348 | 8.524635 | 9.171013 | -0.68116 | 0.115942 | -1.2029  | -3.05799 | 0.113043 | -1.88406 | -3.33623 | -0.39131 | 1.698547 | -0.53914 | -1.83478 | 0.831886 | 4.626091 |
| p-Dichlorobenzene 2 | -0.15073 | -1.89565 | -8.12174 | 7.130435 | 1.336235 | -20.7971 | -0.07536 | 0.153625 | -1.35942 | 3.652176 | 2.933334 | -2.04927 | 9.571014 | 9.504349 | 0.968117 | 0.118841 | -0.74493 | -2.97102 | 0.118841 | -1.29565 | -1.93913 | 0.373917 | 0.420288 | 1.266678 | 0.457977 | 0.571014 | 0.284058 |
| p-Dichlorobenzene 3 | -0.0087  | -2.64348 | -3.42899 | 6.936233 | 0.571014 | -15.629  | 0.107254 | 0.272461 | 0.269562 | 3.600006 | 2.910141 | -1.96522 | 7.571014 | 6.965528 | -0.98841 | 0.011594 | -1.18261 | -3.04057 | 0.005797 | -1.70145 | -1.73622 | 1.098541 | -0.17101 | 0.315933 | -1.06377 | 0.631882 | 4.313046 |
| p-Dichlorobenzene 4 | -0.08986 | -2.75362 | -1.24348 | 5.973913 | -0.25507 | -13.7275 | -0.44058 | -0.0174  | 0.837681 | 2.304352 | 1.660858 | -1.13623 | 6.802895 | 5.968117 | -1.16811 | -0.04058 | -1.45507 | -3.20001 | -0.01739 | -2.24348 | -1.73042 | -0.52754 | 0.202896 | -0.29565 | -0.92464 | 0.321739 | 4.550724 |
| p-Dichlorobenzene 5 | -0.17101 | -1.82029 | -5.50725 | 6.397101 | 0.823189 | -21.4522 | 0.115936 | -0.88405 | 0.075363 | 2.576813 | 1.953629 | -1.74783 | 8.591309 | 7.556526 | -0.77681 | 0.017391 | -1.57101 | -3.42609 | 0.46087  | -1.74493 | -2.62898 | -0.03188 | -0.21739 | -2.08116 | -0.55653 | 1.226089 | 3.86087  |
| Acetone 1           | -0.10725 | -2.62319 | -4.89565 | 8.388406 | 1.721733 | -24.6696 | 0.823181 | -0.09856 | -1.72464 | 2.524643 | 1.669571 | -4.57971 | 8.915939 | 7.881157 | -3.24058 | 0.028986 | -1.68116 | -4.18552 | 0        | -2.17971 | -2.78841 | 0.356522 | 0.350723 | -1.28986 | -0.09566 | 2.518845 | 2.078262 |
| Acetone 2           | -0.15942 | -2.31305 | -4.6058  | 7.208696 | 1.655067 | -24.6435 | 1.031876 | -0.48117 | -1.66667 | 4.211594 | 2.973907 | -2.95942 | 8.002899 | 7.484055 | -2.78551 | 0.031884 | -1.2     | -1.8058  | 0.023188 | -2.55362 | -3.1826  | -0.14203 | 0.069565 | -1.31885 | -0.10434 | 2.747826 | 2.41449  |
| Acetone 3           | -0.0058  | -2.72464 | -4.86667 | 7.655073 | 1.315941 | -19.4551 | 0.515945 | 0.089859 | -1.25217 | 3.110153 | 2.797104 | -1.25797 | 7.052177 | 6.973915 | -3.36522 | 0.008696 | -1.2087  | -2.06957 | -0.25797 | -2.25797 | -2.25797 | -0.69275 | -0.23769 | -0.86377 | -0.2058  | 2.385513 | 1.107246 |
| Acetone 4           | -0.23768 | -2.95652 | -5.8841  | 11.33623 | 1.942032 | -26.8725 | 0.782608 | 0.191299 | -0.20869 | 3.74202  | 3.524628 | -2.23478 | 8.713043 | 7.907242 | -2.4     | 0.06377  | -0.27826 | -3.3942  | 0.104348 | -1.37102 | -3.12463 | 0.402908 | -1.11015 | -0.94203 | -0.0058  | 1.057968 | 3.31884  |
| Acetone 5           | -0.36522 | -2.82898 | -3.79131 | 5.313044 | 1.881165 | -21.3565 | 1.678268 | 0.588409 | 0.130436 | 4.092758 | 2.692749 | -2.86377 | 7.771019 | 7.689857 | -2.15942 | 0.02029  | -1.6     | -2.69275 | 0.011594 | -1.85507 | -1.77101 | 0.031876 | 0.269562 | 0.472458 | -0.24347 | 0.860863 | 4.463768 |
| MEK T1              | -0.17681 | -1.64637 | -9.77391 | 23.25507 | 8.942032 | -44.5884 | 1.443466 | 1.168121 | -0.12464 | 5.289856 | 3.884048 | -2.51015 | 8.41449  | 7.101448 | -5.73333 | 0.005797 | -1.37101 | -4.50435 | 0.863768 | -2.35942 | -1.9855  | 1.063766 | -0.55072 | 0.788406 | 1.072464 | 0.988403 | 2.556519 |
| MEK T2              | -0.15652 | -1.29275 | -13.1797 | 29.27826 | 10.94782 | -48.2319 | 0.600006 | 1.307251 | -0.33913 | 5.869553 | 4.649277 | -3.92175 | 11.86087 | 11.77971 | -3.36812 | 0.107246 | -1.23478 | -5.06957 | 0.428985 | -2.28986 | -3.51305 | -0.65506 | 1.260864 | -0.52174 | -0.20869 | 0.133331 | 1.834785 |
| MEK T3              | 0.002899 | -1.81449 | -10.4087 | 19.08986 | 8.417397 | -46.9681 | 1.492752 | 2.055069 | -0.16522 | 5.901443 | 5.886948 | -1.76811 | 12.50725 | 13.14783 | -4.24348 | -0.01159 | -1.6116  | -4.39131 | -0.05217 | -3.26667 | -3.829   | 1.342026 | -0.11015 | 0.36232  | 0.350723 | 0.599998 | 3.631882 |
| MEK T4              | -0.07826 | -1.18551 | -8.65217 | 24.76232 | 8.927536 | -41.4203 | 2.107254 | 1.452179 | -0.76812 | 5.678253 | 4.971008 | -2.28406 | 11.34782 | 11.49855 | -3.01739 | 0.04058  | -1.37681 | -5.0116  | 1.217391 | -1.79131 | -2.42319 | 0.846375 | 0.336243 | 0.568115 | -0.33624 | 0.518837 | 2.402901 |
| MEK T5              | -0.05507 | -0.49565 | -11.3536 | 20.42319 | 9.301445 | -50.3072 | 1.53334  | 1.249283 | -1.36522 | 4.599991 | 0.084061 | -1.08986 | 11.22319 | 11.93333 | -3.99131 | 0.04058  | -1.67246 | -4.95073 | 0.533333 | -2.0058  | -3.49855 | 0.231888 | 0.388412 | 0.159409 | 0.36232  | 0.255066 | 2.565216 |
| Limonene 1          | 0        | 0.45797  | 0.313049 | 8.275364 | 2.533333 | -12.4232 | 2.269562 | 1.84639  | -2.37971 | 3.649277 | 3.17392  | -1.11305 | 9.44783  | 9.049286 | -2.0087  | 0.695653 | -1.02319 | -0.0116  | 0.924638 | -1.46956 | -0.70725 | 0.942032 | 0.22319  | 1.008698 | -0.25797 | 1.313049 | -1.05797 |
| Limonene 2          | -0.04348 | 0.811596 | -0.43189 | 10.57391 | 3.272469 | -15.5159 | 1.559433 | 0.049271 | -1.26377 | 3.733337 | 1.568115 | -1.54493 | 5.202896 | 10.75362 | -2.42029 | 0.405797 | -1.11594 | -0.98262 | 1.678261 | -1.42319 | -3.84638 | 1.176819 | 0.663757 | 0.710144 | 0.214493 | -0.36812 | -0.50435 |
| Limonene 3          | 0        | 1.802898 | 0.162323 | 6.550724 | 2.069565 | -12.713  | 2.008698 | 0.075363 | -1.22029 | 2.037674 | 2.298553 | -0.82609 | 4.460876 | 10.16232 | -2.96812 | -0.04638 | -1       | -2.47536 | 0.066667 | -1.24928 | -1.74783 | -0.36232 | -0.79421 | -1.50145 | -1.2058  | -5.53912 | -7.94493 |
| Limonene 4          | 0.017391 | 0.568115 | 0.727539 | 7.962318 | 2.657967 | -10.8551 | 1.507248 | 0.72464  | -1.95073 | 3.698563 | 2.628983 | 0.411591 | 5.608688 | 9.800003 | -1.87827 | 0.718841 | -1.2029  | 0.046387 | 0.544928 | -0.85217 | -0.09274 | -0.45508 | -0.65797 | 0.223175 | -0.4203  | 1.171021 | 0.831879 |
| Limonene 5          | 0.014493 | 0.782608 | -0.49275 | 8.220291 | 3.127541 | -11.6406 | 3.226089 | 1.936234 | -1.55072 | 1.808685 | 2.353622 | -2.15652 | 5.098557 | 9.884064 | -1.82899 | 0.414493 | -1.08985 | 0.608688 | 0.344928 | -1.27827 | -0.66957 | -0.47826 | 0.124634 | 0.162323 |          |          |          |

|                     | R19      | G19      | B19      | R20      | G20      | B20      | R21      | G21      | B21      | R22      | G22      | B22      | R23      | G23      | B23      | R24      | G24      | B24       | R25      | G25      | B25      | R26      | G26      | B26      | R27      | G27      | B27      |
|---------------------|----------|----------|----------|----------|----------|----------|----------|----------|----------|----------|----------|----------|----------|----------|----------|----------|----------|-----------|----------|----------|----------|----------|----------|----------|----------|----------|----------|
| ethyl acetate 1     | 0.672462 | 0.489855 | -0.35652 | -0.26956 | -1.0087  | 0.585506 | 0.342026 | 0.382599 | 0.747833 | -0.50433 | -0.89854 | -1.9913  | 0.365219 | 0.075362 | -0.02609 | 0.147827 | -0.54202 | -1.15652  | -0.62029 | -0.23189 | -0.90145 | -0.02899 | -0.1826  | 0.269566 | 0.176819 | -0.64058 | -0.06957 |
| ethyl acetate 2     | 0.47826  | 0.744927 | -0.44927 | -1.04637 | 0.347824 | -0.37391 | 0.142029 | 0.002899 | 2.371017 | -0.26086 | -0.34782 | -0.84348 | 0.492752 | 0        | -0.34203 | 0.237671 | -0.83189 | -1.31884  | -0.52754 | -0.44928 | -0.42319 | -0.25797 | 0.034782 | 0.298551 | 0.736237 | -0.15073 | 1.846375 |
| ethyl acetate 3     | 0.347824 | 0.359421 | -0.56232 | -0.77681 | 0.098557 | -0.66667 | 0.617401 | -0.56232 | 0.142029 | 0.27536  | -1.26376 | -1.23768 | -0.0058  | -0.01449 | -0.4     | 0.055069 | -1.0029  | -1.32464  | 0.489853 | -0.22899 | -0.91304 | 0.13913  | 0.243477 | -0.67246 | -0.68985 | -0.91596 | -1.23769 |
| ethyl acetate 4     | 0.831882 | 0.518841 | -0.31884 | -0.34203 | -0.40289 | -0.24638 | -0.0174  | 0.162323 | 0.704346 | 0.840576 | -0.91594 | -0.32464 | 0.243477 | 0.002899 | -0.15073 | -0.19132 | 0.072464 | -1.35942  | 1.130447 | -0.04058 | -0.84058 | 0.286957 | 0.104347 | 0.165217 | -0.05217 | -0.24059 | -0.1971  |
| ethyl acetate 5     | 0.379128 | 0.391769 | -0.61293 | -0.84672 | 0.107427 | -0.72667 | 0.672967 | -0.61293 | 0.154812 | 0.300142 | -1.3775  | -1.34907 | -0.00632 | -0.0158  | -0.436   | 0.060025 | -1.09316 | -1.44386  | 0.53394  | -0.2496  | -0.99522 | 0.151652 | 0.26539  | -0.73298 | -0.75194 | -0.99839 | -1.34908 |
| iso-Propanol 1      | 0.281158 | 0.402899 | -1.07536 | -0.03769 | -0.3884  | -1.04058 | -0.32755 | -0.23769 | 1.098541 | 0.576813 | -1.20869 | -0.03478 | 0.742027 | 0        | 0.049275 | 0.27536  | -1.33624 | 0.611595  | -0.23769 | -0.69566 | -0.68695 | 0.820282 | 0.208694 | -0.09275 | 0.214493 | -0.62029 | 0.884048 |
| iso-Propanol 2      | 0.794201 | -0.11884 | -0.83769 | 0.715942 | 0.121735 | -1.53333 | 0.831894 | 1.736221 | 1.011581 | 1.576813 | 0.252182 | -0.8058  | 0.715942 | 0        | -0.45217 | 0.208694 | -0.75652 | -0.48116  | 1.356522 | -0.68986 | -0.74493 | 1.472473 | 0.649277 | -0.62609 | 0.953629 | 0.434784 | -0.11594 |
| iso-Propanol 3      | 0.857971 | 0.527535 | -0.69566 | -0.41159 | -0.60291 | -0.47826 | 0.185516 | -0.35072 | 2.568115 | -0.57681 | -0.47246 | -0.08985 | 1.226082 | 0        | -0.16232 | -0.45796 | -0.62029 | -0.2087   | 0.173904 | 0.568123 | -1.19131 | 1.017395 | -0.55073 | 0.284058 | 0.031891 | -0.63768 | -0.25217 |
| iso-Propanol 4      | 0.643478 | 0.608696 | -0.3913  | 0.066666 | -0.13043 | -0.54783 | -0.40869 | -0.14493 | 0.933334 | -0.11884 | 0.710144 | -0.5884  | 1.04348  | 0        | -0.08406 | -0.92174 | -1.1913  | -0.95652  | 0.44928  | -1.0087  | -0.26087 | 0.197113 | 0.391304 | 0.269566 | -0.46086 | 0.26088  | -0.68405 |
| iso-Propanol 5      | 0.524639 | 0.324638 | -0.43768 | -0.25508 | 0.391312 | -0.0058  | 1.162323 | 0.298553 | 1.597107 | 1.431885 | -0.17392 | -0.25797 | 1.452171 | 0        | 0.257971 | -0.54782 | -0.83478 | -0.49565  | 0.504349 | -0.6     | -0.07826 | 0.195939 | 0.002892 | 0.402899 | 0.356522 | 0.234787 | -0.25798 |
| Styrene T1          | 0.724632 | 1.336233 | 0.086952 | 1.802902 | 0.142029 | 0.046379 | 0.579712 | 0.55072  | 1.220291 | -0.0174  | 0.272476 | -0.62318 | 1.127533 | 0.237681 | 0.040579 | 0.460876 | 0.347839 | -1.17391  | 1.214493 | 0.324638 | -0.28116 | 0.98262  | -0.30145 | 0.599999 | 0.736237 | 0.12175  | 0.857971 |
| Styrene T2          | 0.515945 | 1.176812 | -0.07246 | 0.878265 | 1.142029 | -1.11884 | 0.553619 | -0.09564 | -0.29276 | 0.27536  | 0.342026 | -1.37681 | 0.194206 | -0.32754 | -0.10725 | 0.310135 | -1.0058  | -1.81739  | 0.756531 | 0.156525 | -0.82608 | 0.391296 | -0.12463 | -0.48696 | 0.805801 | -0.48117 | 0.269569 |
| Styrene T3          | 0.376816 | 0.686956 | -1.8029  | 1.25798  | -0.13623 | -2.72754 | -0.22319 | -1.9971  | 0.417389 | -0.75073 | -1.27246 | -1.79421 | -0.73913 | -0.13913 | 0.165217 | -0.99422 | -2.31595 | -2.53913  | -1.11014 | -0.69856 | -2.24348 | -0.8145  | -0.03768 | -0.11304 | -0.88986 | -1.29855 | -0.19421 |
| Styrene T4          | 0.423187 | 0.304348 | -1.71014 | 1.504349 | 0.631882 | -1.82029 | -0.36232 | 0.249283 | 0.73912  | -0.11594 | -0.26666 | -1.55363 | -0.17681 | -0.08406 | -0.06667 | -0.57101 | -0.21449 | -1.4      | -0.75362 | 0.084053 | -2.2029  | -0.46378 | 0.040581 | 0.397101 | -1.0029  | -0.07536 | -1.17392 |
| Styrene T5          | 1.103437 | 0.791304 | -0.15942 | 1.669571 | 1.017395 | -1.6     | -0.1739  | 0.295654 | 0.602095 | 0.211594 | -0.44928 | -0.87827 | -0.09856 | 0.234783 | 0.562319 | 0.698653 | -0.91884 | -1.06667  | 0.113052 | 0.165222 | -0.53623 | -0.48695 | 0.597099 | 0.191305 | -0.27246 | -1.21449 | -0.03479 |
| p-Dichlorobenzene 1 | 0.843475 | 0.907246 | -0.85797 | -0.8145  | -0.41159 | -0.6     | -0.02898 | -0.30725 | 0.681152 | -0.3942  | -0.64638 | -1.18551 | -0.41159 | 0.449275 | -0.13623 | -0.64348 | -0.35362 | -1.91015  | -0.13913 | -0.30434 | -1.49276 | -0.51595 | -0.52464 | 0.045796 | -0.03479 | -0.66377 | 0.078262 |
| p-Dichlorobenzene 2 | 1.365219 | 0.426088 | -0.84927 | 0.084045 | 0.22319  | -0.03478 | 0.94783  | 1.817398 | -0.1855  | 1.220291 | 0.205795 | -0.6     | 0.304337 | 0.150725 | -0.17101 | 0.144928 | 0.13623  | -0.208986 | 0.855072 | -0.28986 | -1.0058  | 0.289856 | 0.365219 | 0.307246 | 0.260864 | 0.199997 | -0.64058 |
| p-Dichlorobenzene 3 | 0.365219 | 0.707247 | 0.353622 | 0.837677 | 0.527542 | -0.86087 | -0.21449 | -0.65218 | 1.397095 | 0.414505 | -0.59421 | -0.28116 | 0.252167 | -0.02319 | 0.214493 | 0.373917 | -1.06377 | -0.91594  | -0.59131 | -0.58261 | -0.46667 | -0.04347 | -0.13623 | -0.87246 | -0.88985 | -0.2058  | -1.35362 |
| p-Dichlorobenzene 4 | 0.655075 | 0.692755 | -1.24058 | -0.17102 | -0.8145  | -1.48696 | -0.30145 | -0.31015 | -0.06087 | -0.8232  | -0.95361 | 0.075363 | 0.571014 | 0.423189 | -0.0087  | -0.37682 | -0.84638 | -2.27536  | -0.40869 | -0.28406 | -0.84348 | 0.48407  | -0.45217 | 0.28116  | -0.09564 | 0.220291 | 1.040573 |
| p-Dichlorobenzene 5 | 1.086952 | 0.750723 | -0.08986 | 2.495667 | 0.356522 | -0.87826 | 0.211594 | -0.47537 | 0.014496 | -0.00578 | 0.237686 | -0.62608 | -0.28986 | 0.246377 | -0.08116 | 0.057968 | -1.07826 | -1.13043  | 0.095657 | -0.55362 | 0.066666 | 0.072464 | 0.005798 | -0.08116 | -0.1855  | -0.3942  | 0.330429 |
| Acetone 1           | 0.452171 | 1.037682 | -1.49855 | -2.35652 | -0.93333 | -0.1913  | -1.0087  | -0.40581 | 0.768112 | -0.36522 | -0.34782 | -2.29565 | 0.852173 | 0.17971  | -0.04348 | -1.17972 | -1.42609 | -2.18261  | 0.400009 | -0.64058 | -1.62029 | 0.379715 | 0.303444 | 0.423188 | -1.34204 | -1.15363 | -0.48695 |
| Acetone 2           | 0.605804 | 1.44348  | -0.35652 | -1.72752 | -1.63478 | -0.0029  | -0.66666 | -0.40579 | 1.721741 | -0.48695 | -1.06378 | -1.6116  | 0.107239 | 0.197101 | -0.4     | -0.54782 | -1.2058  | -2.6087   | -0.33914 | -0.95362 | -0.87536 | -0.0058  | -0.04058 | 0.356522 | -0.88696 | -1.15653 | 1.084045 |
| Acetone 3           | 0.342026 | 0.878262 | -0.74204 | -0.40869 | -0.37392 | 0.063766 | 0.36232  | -0.31595 | 1.944931 | -0.22029 | 0.055069 | -1.8116  | 0.631882 | 0.35942  | -0.04928 | -0.63188 | -0.28406 | -1.65797  | -0.71594 | -0.46957 | -0.47826 | 0.417389 | 0.133331 | 0.18261  | 0.979721 | -0.03767 | 1.057968 |
| Acetone 4           | 0.704346 | 1.055073 | -1.01739 | -0.86667 | 0.02319  | 0.153625 | -0.46376 | 0.228989 | 0.936234 | -1.64348 | 0.400009 | 0.197102 | -0.23478 | 0.944931 | -0.50435 | -1.71304 | -0.45218 | -0.04927  | -0.54783 | -0.28696 | 0.031883 | 0.443478 | -0.09564 | 0.159424 | -1.0087  |          |          |
| Acetone 5           | 0.620285 | 0.89855  | -0.72754 | -0.70145 | -1.1855  | -0.71014 | -1.2029  | 0.147827 | 0.495651 | 0.492752 | -0.97101 | -1.25217 | 0.544937 | -0.17681 | -0.10725 | -0.24927 | -1.36522 | -0.73913  | -0.68407 | -0.43768 | -1.24638 | -0.02609 | -0.15942 | 0.391306 | -0.82608 | -0.87247 | -0.67827 |
| MEK T1              | 0.828979 | 0.6      | -0.33623 | -1.14493 | -0.36232 | 1.484058 | 0.43189  | -0.33333 | 0.747833 | 0.431885 | 0.011597 | -0.97971 | 0.86087  | -0.0058  | -0.06377 | 0.298553 | -0.35652 | -0.70435  | -0.20869 | -0.62899 | -1.13913 | -0.04929 | -0.33624 | 0.481159 | -0.70725 | -0.70725 | 1.272461 |
| MEK T2              | 0.388405 | 0.953623 | -0.31304 | -0.27246 | -1.12463 | -0.46087 | -1.02319 | 0.368118 | 0.852173 | -0.45216 | -0.04349 | -0.81739 | 0.269562 | 0.182609 | -0.22609 | -0.12753 | -0.73624 | -0.24348  | -0.3768  | -0.22899 | -0.84638 | -0.13043 | 0.153625 | -0.14783 | -0.88115 | 0.055069 | -0.13913 |
| MEK T3              | -0.02899 | 0.921738 | 0.188408 | -0.77971 | -0.59131 | 0.165218 | -0.18262 | -0.12174 | 1.895645 | 0.286957 | 0.113037 | -1       | 1.069565 | 0.153624 | -0.3971  | -0.09276 | 0.078262 | -1.4087   | -0.10434 | -0.32174 | -1.14203 | -0.13623 | 0.211594 | 0.321739 | -0.42609 | -1.32173 | -0.38841 |
| MEK T4              | -0.15073 | 1.078262 | -1.35072 | -0.68407 | -0.65797 | -0.03478 | 0.402908 | 0.040573 | 0.626083 | 0.518829 | 0.197113 | -0.86377 | 0.495651 | 0.005797 | 0.347826 | -0.49855 | -0.21159 | -1.56232  | -0.15363 | -0.77971 | -0.97681 | 0.368103 | 0.257965 | -0.24348 | 0.542023 | -0.16522 | 0.107254 |
| MEK T5              | -0.05797 | 0.704348 | -0.53333 | -0.28696 | -0.71884 | -0.47826 | -0.13623 | -0.24348 | 0.028976 | 0.571014 | -0.05219 | -1.48696 | 0.921753 | 0.17971  | 0.301449 | -0.26376 | -0.46666 | -1.92174  | 0.428986 | -0.86957 | -0.13913 | -0.09566 | -0.25217 | 0.23768  | -0.28696 | -0.69855 | 0.078262 |
| Limonene 1          | 0.828987 | -0.58841 | -1.65508 | -1.15942 | -0.59419 | 0.304352 | -0.28696 | 0.640579 | 4.521744 | 0.199997 | 0.481155 | 1.168114 | 0.17392  | -0.37102 | -0.27246 | -0.24638 | 1.188416 | -1.06087  | -0.22899 | 0.159424 | -0.29565 | -0.14783 | 7.220291 | 0.568119 | -0.12174 | 0.162323 | 0.91304  |
| Limonene 2          | 0.084061 | -0.22899 | 0.765213 | 4.878265 | 1.44928  | -1.21159 | 0.246384 | 0.794205 | 4.544922 | 0.962311 | -0.76811 | -0.74783 | 0.663773 | -0.49565 | -0.17594 | 0.002899 | -0.27536 | -0.53333  | 1.086945 | 1.402908 | 2.669567 | -0.60001 | 7.388405 | 1.191303 | 0.86377  | 0.933334 | -0.84638 |
| Limonene 3          | 1.017395 | 1.397102 | 0.35363  | -1.91594 | -0.75362 | 0.350723 | -1.59421 | 0.110138 | 3.402893 | -0.89276 | -0.47536 | -0.21449 | -0.58841 | 0.231888 | -0.14203 | -0.64058 | -1.30725 | 0.121738  | -1.23189 | -0.30725 | 0.628986 | -1.12463 | 6.260864 | 0.715942 | -0.91304 | -0.02029 | -0.93623 |
| Limonene 4          | 0.289856 | -0.34493 | -0.47826 | -0.56522 | 0.011597 | 0.197102 | 0.046371 | -0.6232  | 4.58551  | -0.29565 | 0.249283 | 0.472466 | -0.42899 | 0.31884  | 0.231884 | -0.55653 | -0.61449 | -0.37681  | 0.513046 | 0.031876 | -0.17971 | -0.05797 | 7.234787 | 1.420288 | -0.47246 | 0.075348 | 0.892761 |
| Limonene 5          | 0.484062 | -0.28696 | -0.14203 | -0.95653 | -0.6116  | 0.747826 | -0.52464 | 1.121735 | 3.805801 | -0.26088 | 0.394196 | -0.97102 | -0.40289 | -0.06957 | -1.27536 | 0.631882 | 0.191299 | -0.8116   | 0.301453 | 0.199997 | 0.933334 | -0.25217 | 6.571014 | 0.333332 | -0.22609 | 0.084061 | -0.02028 |
| Camphene T1         | 0.22029  |          |          |          |          |          |          |          |          |          |          |          |          |          |          |          |          |           |          |          |          |          |          |          |          |          |          |

|                      | R28      | G28      | B28      | R29      | G29      | B29      | R30      | G30      | B30      | R31      | G31      | B31      | R32      | G32       | B32      | R33      | G33      | B33      | R34      | G34      | B34      | R35      | G35      | B35      | R36      | G36      | B36      |
|----------------------|----------|----------|----------|----------|----------|----------|----------|----------|----------|----------|----------|----------|----------|-----------|----------|----------|----------|----------|----------|----------|----------|----------|----------|----------|----------|----------|----------|
| Benzene 1            | -0.45797 | -0.38551 | -1.21159 | 1.063766 | 0.095654 | 0.542023 | -0.22029 | -0.2     | 0.292755 | -0.14783 | -0.15653 | 0.63768  | -0.70435 | -0.3826   | 0.173904 | 3.25798  | 0.55072  | 0        | -0.86087 | 0.704346 | 0        | 0.014494 | -0.94783 | -2.11304 | -0.01739 | -1.62319 | -1.68115 |
| Benzene 2            | -0.41159 | -0.21449 | -0.71304 | 0.339127 | -0.03188 | -0.03188 | 0.440567 | -0.91304 | -1.35072 | -0.06957 | 0.852173 | -0.64058 | -0.56522 | -0.3913   | 0.118835 | 1.715942 | 0.124649 | 0        | -0.35652 | -0.2029  | -0.14203 | -0.8058  | -2.45217 | -5.1768  | 0.626087 | -1.02609 | -2.53623 |
| Benzene 3            | -0.47246 | -0.35362 | -0.98551 | -0.03478 | -0.17971 | -0.15883 | 0.617386 | 0.304352 | 0.927536 | -0.61739 | -0.71594 | -0.90726 | -0.32175 | 0.234787  | -1.28406 | 0.924637 | 0.782608 | -0.04638 | 0.324631 | -0.2029  | -0.10145 | 0.168114 | -1.51594 | -2.93044 | -0.22609 | -1.99131 | -1.92754 |
| Benzene 4            | -0.3942  | -0.35362 | -0.56812 | 1.144928 | 0.481159 | -0.28696 | 0.028992 | 0.150726 | -0.14493 | 1.014496 | -0.54204 | 0.391296 | 0.611603 | -0.0087   | 1.150726 | 3.342026 | 0.608688 | 0        | 1.017395 | 0.159424 | -0.26377 | 0.226088 | -1.26377 | -2.8087  | 0.057972 | -1.82898 | -1.90725 |
| Benzene 5            | -0.51499 | -0.38545 | -1.0742  | -0.0379  | -0.19588 | -0.56552 | 0.672951 | 0.331744 | 1.011014 | -0.67295 | -0.78038 | -0.98891 | -0.3507  | 0.255918  | -1.39962 | 3.187854 | 0.853043 | -0.05055 | 0.353848 | -0.22116 | -0.11058 | 0.183244 | -1.65237 | -3.19417 | -0.24644 | -2.17053 | -2.10101 |
| Toluene 1            | 0.086957 | -0.41159 | -0.71015 | 0.634781 | -0.06087 | -0.49275 | -0.87537 | -1.11014 | -0.34493 | -0.3913  | -0.42609 | 0.417389 | -0.22609 | -0.22609  | -1.34493 | 1.730438 | -0.56812 | 0        | 0.223175 | 0.092743 | 0        | -0.0029  | -1.36812 | -3.50145 | -0.7884  | -2.40579 | -1.33913 |
| Toluene 2            | -0.24058 | -0.55362 | -1.25797 | 0.437668 | -0.49855 | -1.25508 | 0.643478 | 1.182602 | -0.629   | 0        | 0        | 0.542038 | 0.460876 | -0.45798  | 3.110153 | 0.628983 | -0.07826 | 0.133347 | 0.576813 | -0.06087 | 0.046377 | -1.58551 | -2.75943 | -1.38261 | -1.9913  | -1.09276 |          |
| Toluene 3            | -0.23478 | -0.07536 | 0.246376 | 0.846375 | -0.12174 | 0.794205 | 0.063766 | 0.318848 | -0.41451 | -0.51303 | 0.295654 | -1.1971  | 0.057983 | -0.30145  | -0.00868 | 3.620285 | -0.21159 | -0.28116 | -0.05798 | 0.275362 | -0.02029 | 0.275362 | -1.44058 | -2.04637 | 0.052174 | -1.55362 | -1.25217 |
| Toluene 4            | -0.11884 | -0.06957 | -0.93333 | 1.089859 | 0.246376 | -0.50435 | -0.30725 | -0.25507 | -2.1826  | 0.107254 | -0.97681 | 0.550735 | -0.44058 | -0.01738  | -0.25798 | 3.10144  | -0.03479 | -0.44058 | -0.25797 | 0.831879 | 0        | 0.28116  | -1.14203 | -3.08695 | 0.104349 | -1.52754 | -2.22319 |
| Toluene 5            | 0.008696 | -0.22609 | -0.29565 | 1.008698 | 0.449276 | -0.76521 | 0.060867 | 0.026093 | 0.205795 | 1.371017 | -0.1768  | -0.69855 | 0.200012 | 0.373917  | 1.533325 | 5.788406 | 1.153625 | 0        | 0.875366 | 0.884048 | 0.008696 | -0.07536 | -1.61739 | -3.25797 | -0.43189 | -1.95362 | -1.64638 |
| HCHO 1               | -0.43768 | -0.15942 | 0.031891 | 0.652176 | 0.536232 | 0.431885 | 1.211594 | 0.402893 | 0.962326 | 1.353622 | 0.657974 | -0.38551 | 1.014496 | 0.46666   | 0.428986 | 8.03479  | 0.182617 | -0.02609 | -0.2     | 1.237686 | -0.22319 | 1.034782 | -0.8029  | -9.33623 | 0.939129 | -0.98261 | -4.1768  |
| HCHO 2               | -0.36812 | -0.1971  | -1.09856 | 1.115952 | 0.095654 | 0.434784 | 0.110153 | 0.168121 | -0.48695 | 0.515945 | -0.15653 | 0.197098 | 0.113045 | 0.718842  | -0.56522 | 6.605789 | -1.67247 | -0.0058  | 0.263763 | 0.855072 | -0.2029  | 0.762321 | -1.26087 | -7.74204 | 0.663769 | -1.10145 | -4.75942 |
| HCHO 3               | -0.50435 | -0.85217 | -1.33624 | -0.85217 | -0.13044 | -1.28986 | -2.06957 | -1.57681 | 0.524628 | -0.31305 | 0.026093 | -1.05508 | -0.65797 | -0.64058  | -2.1913  | 4.936234 | -2.34493 | 0        | -2.42899 | -0.50725 | -0.56812 | 0.799999 | -3.37971 | -20.3159 | 0.611595 | -2.76811 | -8.08985 |
| HCHO 4               | -0.34783 | -0.12754 | -0.83769 | 0.562317 | -0.11594 | -1.68407 | -1.40579 | 0.385513 | -0.1768  | -0.24927 | -0.58261 | -0.8116  | -0.69565 | 0.426086  | 0.226074 | 3.481155 | -1.36522 | 0        | -0.19421 | 0.608704 | 0.014493 | 0.869568 | -1.48406 | -11.1797 | 0.113041 | -2.74783 | -8.36232 |
| HCHO 5               | -0.1913  | -0.42609 | -1.1884  | -0.11015 | -0.24638 | -0.22319 | 0.156525 | -0.86087 | -0.91014 | -1.28116 | -0.60001 | 1.469574 | -0.84348 | -0.217392 | -0.46957 | 5.092743 | -1.66376 | 0        | -4.78227 | -0.09274 | -0.26957 | 0.846375 | -2.30725 | -15.1826 | 0.698551 | -1.65218 | -6.89565 |
| 1,1,1 Tchlroethane 1 | -0.44058 | -0.35362 | -1.37681 | -0.3681  | -0.08406 | -1.67535 | -0.86377 | -0.57681 | -0.24347 | -0.78551 | -2.27536 | -2.97972 | -0.8058  | -1.11595  | -0.47536 | 2.571014 | 0.078262 | 0        | -1.57971 | -1.1971  | -0.17101 | -0.51884 | -2.55652 | -12.7362 | -0.69855 | -1.86667 | -5.75942 |
| 1,1,1 Tchlroethane 2 | -0.2087  | -0.1971  | -1.11015 | -0.21159 | 0.495651 | 0.710144 | 0.252182 | 0.475357 | -0.07536 | 0.078262 | -2.90726 | -1.75363 | -0.58839 | -0.18552  | -0.21159 | 3.492752 | 2.44928  | 0        | 1.066681 | 1.973923 | -0.28696 | 0.008694 | -2.8     | -13.3507 | 0.101448 | -2.13913 | -6.40869 |
| 1,1,1 Tchlroethane 3 | -0.5942  | -0.58551 | -1.65507 | 0.408707 | 0.553623 | -0.84927 | -0.42319 | -0.28986 | -0.25797 | -1.7972  | -1.30435 | -2.14493 | -0.90146 | 0.342041  | -1.16231 | 3.559418 | 1.428986 | -0.35942 | -0.59711 | 0.785507 | -0.91304 | 0.255074 | -2.56812 | -11.1478 | 0.446377 | -2.0058  | -5.87827 |
| 1,1,1 Tchlroethane 4 | -0.91594 | -0.68116 | -0.57681 | -0.21159 | 0.101448 | -0.11594 | 0.382599 | 1.32753  | 1.371017 | -1.05217 | -2.55072 | -2.8058  | -1.15653 | -0.50725  | -0.97391 | 4.246368 | 1.892746 | -0.15942 | -1.66667 | 0.194199 | 0.156522 | -0.62899 | -2.57391 | -12.6522 | -0.02609 | -1.79421 | -5.74493 |
| 1,1,1 Tchlroethane 5 | -0.51884 | -0.15942 | -0.35942 | -0.95073 | -0.11884 | -1.17102 | 0.8116   | 1.397095 | 1.597092 | -1.53912 | -4.30144 | -3.68697 | -0.24927 | -0.28116  | -0.50725 | 5.417389 | 1.86377  | -0.17391 | -1.35362 | -0.0116  | -0.02609 | -0.0058  | -2.17101 | -13.287  | 0.144928 | -2.1913  | -6.18261 |
| p-Xylene 1           | -0.98261 | -0.43189 | -0.97971 | 0.904343 | -0.08696 | -0.93623 | -1.29274 | -0.72754 | 0.133347 | 0.623184 | 1.269562 | 0.944916 | -0.77391 | 0.646378  | -1.08696 | 3.881165 | 0.608704 | 0        | -0.66377 | 0.171005 | -0.07536 | -0.57391 | -3.44058 | -14.2985 | -0.68985 | -3.89565 | -8.55363 |
| p-Xylene 2           | -0.4087  | -0.37391 | -0.94493 | -0.24927 | -0.15942 | -1.49855 | -0.07246 | 0.753616 | -0.42319 | -2.31305 | -2.34203 | -0.16232 | -0.50145 | -0.44927  | 0.252182 | 2.805801 | 0.405807 | 0        | -0.11304 | 0.895645 | -0.53623 | -0.23478 | -2.66087 | -14.8058 | -0.55652 | -3.02029 | -9.95363 |
| p-Xylene 3           | -0.58841 | -0.4058  | -0.68406 | 0.098557 | 0.199997 | -0.43768 | 0.507248 | 0.918854 | 0.373917 | -1.62898 | -0.26086 | 0.785507 | -0.75363 | -0.53622  | -1.04637 | 3.32753  | 1.107254 | 0        | 0.255081 | 0.768127 | -0.86377 | -0.54203 | -2.72174 | -14.8986 | -0.24058 | -2.66087 | -7.43768 |
| p-Xylene 4           | -0.72754 | -0.23478 | -0.96232 | 1        | -0.27536 | -0.09276 | 1.979721 | 0.179703 | 1.124634 | -1.04639 | -0.46666 | -0.42029 | 0.217392 | 0.023193  | 0.907422 | 3.228989 | 1.057968 | -0.06957 | 0.214493 | 1.692749 | -0.72464 | -0.37681 | -3.63769 | -14.7263 | -2.60328 | -2.92175 | -7.2029  |
| p-Xylene 5           | -0.52174 | -0.47826 | -0.77681 | 0.828995 | -0.18551 | 0.698563 | -0.88696 | -1.29276 | 0.831894 | -0.03189 | 0.246384 | -0.03767 | -0.34782 | -0.46957  | 0.257965 | 2.089859 | 0.834793 | -0.01159 | -0.71594 | 0.394211 | 0.669565 | 0.223186 | -2.36811 | -12.742  | 0.489857 | -2.67826 | -4.97102 |
| p-dichlorobenzene T1 | -0.45217 | -0.28986 | -0.34203 | 0.405792 | -0.26377 | -0.94783 | 0.295654 | -0.50145 | -0.08696 | -0.12175 | -0.72464 | 0.492752 | -0.68985 | -1.37682  | 0.73912  | 3.440582 | 1.205795 | 0        | -0.88985 | 0.805801 | -0.54203 | -0.50725 | -3.8     | -15.5217 | -0.24928 | -3.20869 | -9.30434 |
| p-dichlorobenzene T2 | -0.61449 | -0.03189 | -1.37392 | 0.057968 | 0.324638 | -0.57391 | -0.67827 | -0.78551 | 0.440582 | 0.455078 | 0.950729 | -0.76233 | 0.017395 | 0.249268  | 0.095657 | 3.568115 | 1.805786 | 0        | -0.17392 | 0.718842 | -0.10725 | -0.51304 | -3.12753 | -16.0986 | -0.30145 | -3.68696 | -8.46667 |
| p-dichlorobenzene T3 | -0.93333 | -0.52174 | -1.25797 | -0.0145  | -0.44058 | -1.33333 | -0.62029 | -0.35942 | -0.17682 | -0.10724 | -0.55072 | -0.3826  | -0.35362 | -0.08986  | 0.910156 | 3.365219 | 0.72464  | -0.34203 | -0.27536 | 0.773911 | 0.136232 | 0.040581 | -1.33623 | -11.4058 | 0.344929 | -1.9942  | -7.69855 |
| p-dichlorobenzene T4 | -0.8029  | -0.01449 | -1.35362 | 0.579712 | -0.08696 | -0.8     | 0.005798 | -0.83189 | 0.791306 | 0.020294 | 0.559418 | 0.385498 | 0.657974 | -0.0145   | 1        | 4.298553 | 0.86377  | -0.91304 | 1.356522 | 0.484055 | 0.240582 | -0.1942  | -2.81739 | -11.8638 | -0.22029 | -2.84638 | -6.35652 |
| p-dichlorobenzene T5 | -0.36522 | -0.37101 | -0.72174 | 0.562317 | 0.31015  | -0.54204 | -1.16232 | 0.002899 | -0.65508 | -0.43768 | -0.68695 | -1.59131 | -0.51305 | -0.68987  | -0.42319 | 4.298553 | 1.321747 | 0        | -0.21739 | -0.03767 | -0.48116 | 0.330437 | -1.95942 | -10.2348 | -0.00869 | -2.83769 | -9.28696 |
| Limonene T1          | 0.124641 | 0.037682 | 0.031883 | 0.605789 | -0.0174  | -0.07826 | 0.36232  | 1.188416 | -0.24347 | -0.75652 | 0.301437 | -1.81448 | 1.382614 | 0.536224  | 0.623199 | 1.075363 | -0.74782 | 0        | -0.05507 | 0.202896 | 0.414492 | 0.275362 | -0.04348 | -0.97102 | 0.014492 | 0.721741 | -0.47246 |
| Limonene T2          | -0.18261 | -0.53623 | 0.023186 | 0.591309 | -0.33913 | 0.318832 | -0.47246 | -1.40579 | -2.22029 | 0.124634 | -0.72464 | 0.081161 | -0.84638 | -1.2      | 0.791306 | 1.933334 | -0.70435 | 0        | -0.12463 | -0.23767 | 0.153622 | 0.292754 | 0.333334 | -1.76231 | 0.678262 | 0.947826 | -2.0058  |
| Limonene T3          | -0.45507 | 0.266663 | -0.26087 | -0.30724 | -0.06087 | -0.58551 | -0.3971  | -0.64348 | 0.014496 | -0.62898 | -0.48117 | -1.40871 | -0.8     | -0.3913   | -1.06087 | 0.86377  | 0.43187  | 0        | -0.22897 | -0.54492 | 0.028988 | -0.44638 | 0.002899 | -0.6029  | -0.11884 | 0.014492 | -0.69565 |
| Limonene T4          | -0.19131 | 0.597099 | -0.27247 | -0.09276 | 0.118843 | 0.808701 | -0.50145 | -0.70435 | 1.05217  | 0.249283 | -0.53044 | -0.51015 | -0.05217 | 0.202896  | 1.399994 | 0.968124 | -0.66376 | 0        | -0.9971  | 0.782608 | 0.686954 | 0.252174 | -0.2     | -0.11594 | -0.08696 | 0.321739 | -0.35072 |
| Limonene T5          | -0.46957 | 0.13913  | -0.65218 | -0.10725 | 0.524635 | 1        | 0.005798 | 0.50145  | 0.527542 | -0.96523 | 0.730438 | 3.591293 | -0.50725 | -0.35362  | 0.626083 | 0.214493 | -0.62608 | 0        | -0.52174 | 0.892746 | 1.710146 | -0.28696 | 0.118839 | 0.005791 | -0.24928 | 0.072464 | -0.26377 |
| Camphene 1           | -0.05507 | -0.27246 | 0.168118 | 0.27536  | -0.28986 | 0.199997 | -0.17972 | -0.47536 | 0.460861 | -0.08986 | -0.64348 | 0.823196 | -0.67537 | -0.34493  | 0.698547 | 0.8492   |          |          |          |          |          |          |          |          |          |          |          |
